# Supplementary material for: Consensus guidelines on managing Rett syndrome across the lifespan
Source: PubMed Central journal article supplement — BMJ Paediatr Open. 2020 Sep 13;4(1):e000717. doi: 10.1136/bmjpo-2020-000717 (PMC7488790; doi:10.1136/bmjpo-2020-000717), 2020-09-13
Supplement: bmjpo-2020-000717.draft_revisions.pdf [file bmjpo-2020-000717.draft_revisions.pdf]

# BMJ Paediatrics Open

BMJ Paediatrics Open is committed to open peer review. As part of this commitment we make the peer review history of every article we publish publicly available.

When an article is published we post the peer reviewers' comments and the authors' responses online. We also post the versions of the paper that were used during peer review. These are the versions that the peer review comments apply to.

The versions of the paper that follow are the versions that were submitted during the peer review process. They are not the versions of record or the final published versions. They should not be cited or distributed as the published version of this manuscript.

BMJ Paediatrics Open is an open access journal and the full, final, typeset and author-corrected version of record of the manuscript is available on our site with no access controls, subscription charges or pay-per-view fees (<http://bmjpaedsopen.bmj.com>).

If you have any questions on BMJ Paediatrics Open's open peer review process please email [info.bmjpo@bmj.com](mailto:info.bmjpo@bmj.com)

# BMJ Paediatrics Open

## Guidance for Primary Care Providers in Rett Syndrome

|                               |                                                                                                                                                                                                                                                                                                                                                                                                                                                                                                                                                                                                                                                                                                         |
|-------------------------------|---------------------------------------------------------------------------------------------------------------------------------------------------------------------------------------------------------------------------------------------------------------------------------------------------------------------------------------------------------------------------------------------------------------------------------------------------------------------------------------------------------------------------------------------------------------------------------------------------------------------------------------------------------------------------------------------------------|
| Journal:                      | <i>BMJ Paediatrics Open</i>                                                                                                                                                                                                                                                                                                                                                                                                                                                                                                                                                                                                                                                                             |
| Manuscript ID                 | bmjpo-2020-000717                                                                                                                                                                                                                                                                                                                                                                                                                                                                                                                                                                                                                                                                                       |
| Article Type:                 | Original research                                                                                                                                                                                                                                                                                                                                                                                                                                                                                                                                                                                                                                                                                       |
| Date Submitted by the Author: | 28-Apr-2020                                                                                                                                                                                                                                                                                                                                                                                                                                                                                                                                                                                                                                                                                             |
| Complete List of Authors:     | <p>Fu, Cary<br/>         Armstrong, Dallas<br/>         Marsh, Eric<br/>         Lieberman, David<br/>         Motil, Kay<br/>         Witt, Rochelle<br/>         Standridge, Shannon<br/>         Nues, Paige<br/>         Lane, Jane<br/>         Dinkel, Tristen<br/>         Coenraads, Monica<br/>         von Hehn, Jana<br/>         Jones, Mary<br/>         Hale, Katie<br/>         Suter, Bernhard<br/>         Glaze, Daniel<br/>         Neul, Jeffrey<br/>         Percy, Alan<br/>         Benke, Timothy; University of Colorado Denver School of Medicine,<br/>         Pediatrics, Pharmacology, Neurology, Otolaryngology; Children's Hospital<br/>         Colorado, Neurology</p> |
| Keywords:                     | Neurology, Genetics, Syndrome, Rehabilitation, Gastroenterology                                                                                                                                                                                                                                                                                                                                                                                                                                                                                                                                                                                                                                         |
|                               |                                                                                                                                                                                                                                                                                                                                                                                                                                                                                                                                                                                                                                                                                                         |

SCHOLARONE™  
 Manuscripts

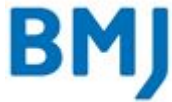

I, the Submitting Author has the right to grant and does grant on behalf of all authors of the Work (as defined in the below author licence), an exclusive licence and/or a non-exclusive licence for contributions from authors who are: i) UK Crown employees; ii) where BMJ has agreed a CC-BY licence shall apply, and/or iii) in accordance with the terms applicable for US Federal Government officers or employees acting as part of their official duties; on a worldwide, perpetual, irrevocable, royalty-free basis to BMJ Publishing Group Ltd ("BMJ") its licensees and where the relevant Journal is co-owned by BMJ to the co-owners of the Journal, to publish the Work in this journal and any other BMJ products and to exploit all rights, as set out in our [licence](#).

The Submitting Author accepts and understands that any supply made under these terms is made by BMJ to the Submitting Author unless you are acting as an employee on behalf of your employer or a postgraduate student of an affiliated institution which is paying any applicable article publishing charge ("APC") for Open Access articles. Where the Submitting Author wishes to make the Work available on an Open Access basis (and intends to pay the relevant APC), the terms of reuse of such Open Access shall be governed by a Creative Commons licence – details of these licences and which [Creative Commons](#) licence will apply to this Work are set out in our licence referred to above.

Other than as permitted in any relevant BMJ Author's Self Archiving Policies, I confirm this Work has not been accepted for publication elsewhere, is not being considered for publication elsewhere and does not duplicate material already published. I confirm all authors consent to publication of this Work and authorise the granting of this licence.

## Guidance for Primary Care Providers in Rett Syndrome

Cary Fu MD<sup>a</sup>, Dallas Armstrong MD<sup>b</sup>, Eric D. Marsh MD PhD<sup>b</sup>, David N. Lieberman MD PhD<sup>c</sup>, Kathleen J. Motil MD PhD<sup>d</sup>, Rochelle Witt MD PhD<sup>c</sup>, Shannon Standridge DO MPH<sup>e</sup>, Paige Nues<sup>f</sup>, Jane Lane RN BSN<sup>g</sup>, Tristen Dinkel CNRN CPN RN BSN<sup>h</sup>, Monica Coenraads<sup>i</sup>, Jana von Hehn PhD<sup>i</sup>, Mary Jones MD MPH<sup>j</sup>, Katie Hale RN MS PNP<sup>j</sup>, Bernhard Suter MD<sup>k</sup>, Daniel G. Glaze MD<sup>k</sup>, Jeffrey L. Neul MD PhD<sup>l</sup>, Alan Percy, MD<sup>g,m</sup>, Tim A. Benke, MD PhD<sup>h,n</sup>

### Affiliations:

<sup>a</sup>Department of Pediatrics and Neurology, Vanderbilt University Medical Center, Nashville, TN;

<sup>b</sup>Division of Neurology, Children's Hospital of Philadelphia and the Department of Neurology, Perelman School of Medicine at the University of Pennsylvania, Philadelphia PA; <sup>c</sup>Department of Neurology,

Boston Children's Hospital; <sup>d</sup>Baylor College of Medicine, Department of Pediatrics, USDA/ARS

Children's Nutrition Research Center, Houston, TX; <sup>e</sup>Department of Pediatrics, University of Cincinnati College of Medicine, Cincinnati, OH and Division of Neurology, Cincinnati Children's Hospital Medical

Center, Cincinnati, OH; <sup>f</sup>International Rett Syndrome Foundation; <sup>g</sup>University of Alabama at

Birmingham, School of Medicine, Civitan International Research Center, Birmingham, AL; <sup>h</sup>Children's Hospital Colorado, Department of Neurology, Aurora, CO; <sup>i</sup>Rett Syndrome Research Trust; <sup>j</sup>UCSF

Benioff Children's Hospital Oakland, Department of Pediatric Medicine, Oakland, CA; <sup>k</sup>Baylor College of Medicine, Departments of Pediatrics and Neurology and Texas Children's Hospital, Houston, TX;

<sup>l</sup>Vanderbilt Kennedy Center, Vanderbilt University Medical Center, Department of Pediatrics,

Pharmacology, and Special Education, Nashville, TN; <sup>m</sup>University of Alabama at Birmingham, School of Medicine, Department of Pediatrics, Neurology, Neurobiology, Genetics, and Psychology, Birmingham,

AL; <sup>n</sup>University of Colorado School of Medicine, Departments of Pediatrics, Pharmacology, Neurology, and Otolaryngology, Aurora, CO.

**Corresponding author:** Tim A. Benke, MD PhD

Address: Children's Hospital Colorado, 13123 E 16<sup>th</sup>, Box B155/Neurology, Aurora, CO 80045, USA

Telephone: 303 724 3568

Email: tim.benke@cuanschutz.edu

**Short title:** Health guidance for Rett Syndrome

**Word Count:**

**Abstract: 189/300**

**Introduction: 528**

**Methods: 551**

**Results: 775**

**Discussion: 504**

**Total: 2358/2500**

**Tables: 7**

**Figures: 0**

**References: 106**

**Supplementary Tables: 2**

**Key words:** Rett syndrome, MECP2, primary care guidelines

**Funding Statement:** Cary Fu: International Rett Syndrome Foundation; Dallas Armstrong: Rett Syndrome Research Trust; Eric D. Marsh: NIH U54 HD061222, Rett Syndrome Research Trust; Rochelle M. Witt: Rett Syndrome Research Trust; David N. Lieberman: Rett Syndrome Research Trust, NIH U54 HD061222; Jane Lane: NIH U54 HD061222, Rett Syndrome Research Trust, International Rett Syndrome Foundation; Paige Nues: International Rett Syndrome Foundation; Kathleen J. Motil: International Rett Syndrome Foundation; Bernhard Suter: Blue Bird Circle, NIH U54 HD061222; Daniel G. Glaze: Blue Bird Circle, NIH U54 HD061222; Jeffery L. Neul: NIH U54 HD061222, U54 HD461222, Rett Syndrome Research Trust; Alan K. Percy: NIH U54 HD061222, Rett Syndrome Research Trust; Tim A. Benke: International Rett Syndrome Foundation, Rett Syndrome Research Trust, NIH U54 HD061222, Children's Hospital Colorado Foundation Ponzio Family Chair in Neurology Research.

**Competing Interest Statement:** Eric D. Marsh: Funding from the NIH and International Rett Syndrome Foundation; clinical trials with GW Pharmaceuticals, Zogenix, Marinus; Consultancy to Stoke therapeutics. David N. Lieberman: Consultancy for AveXis, clinical trials with Acadia, Anavex, GW Pharmaceuticals,. Shannon Standridge: Speaker Bureau for GW Pharmaceuticals. Bernhard Suter: Funding from the NIH and Blue Bird Circle; clinical trials with Acadia. Daniel G. Glaze: Funding from the NIH and Blue Bird Circle; clinical trials with GW Pharmaceuticals, Acadia, Anavex, Newron; Consultancy for Acadia and Trend Community Pharmaceuticals. Jeffery L. Neul: Funding from the NIH; Consultancy with Acadia, AveXis, Biohaven, GW Pharmaceuticals, Kurro, Neuren, Newron, Ovid, Takeda, and Teva. Jane Lane: Funding from NIH; Consultancy from International Rett Syndrome Foundation and GW Pharmaceuticals. Alan K. Percy: Funding from the NIH; Consultancy for Anavex, AveXis, Acadia, and GW Pharmaceuticals; Clinical Trials with Anavex, Acadia, GW Pharmaceuticals, and RSRT; Tim A. Benke: Funding from the NIH, International Foundation for CDKL5 Research, and Loulou Foundation. Consultancy for AveXis, Ovid, GW Pharmaceuticals, International Rett Syndrome Foundation, Takeda, and Marinus; Clinical Trials with Acadia, Ovid, GW Pharmaceuticals, Marinus and RSRT; All remuneration has been made to his department. The other authors have indicated they have no financial relationships relevant to this article to disclose.

**Abbreviations:**

ABR: auditory brainstem response

AAC: augmentative and alternative communication

CVI: cortical visual impairment

DMV: department of motor vehicle

EI: Early Intervention

ICF: International Classification of Functioning, Disability and Health

IEP: Individualized Education Program

NHS: NIH-funded Natural History Study of Rett and related disorders

PCP: primary care provider

RTT: Rett Syndrome

TVI: teacher of the visually impaired

**Summary Box:**

**What is known:** Rett syndrome (RTT) is a multi-system and rare genetic disorder with similarities to other developmental encephalopathies. No randomized phase three clinical trials have assessed

therapeutics in RTT. There are no peer-reviewed consensus-based therapeutic guidance to care in RTT.

**What this study adds:** The primary care provider plays a key role in recognizing, treating and directing care of patients with RTT. A consensus on guidance for the primary care provider was developed based on literature review and expert opinion. This guidance is applicable to other rare and often severe neurodevelopmental disorders.

## Abstract

Background: Rett syndrome (RTT) is a severe neurodevelopmental disorder with complex medical comorbidities extending beyond the nervous system requiring the attention of primary care providers. No randomized phase three clinical trials have assessed therapeutics in RTT. There are no peer-reviewed consensus-based therapeutic guidance to care in RTT. The objective was to provide consensus on guidance of best practice for addressing these concerns.

Methods: Informed by the literature and using a modified Delphi approach, a consensus process was utilized to develop guidance for care in RTT by primary care providers.

Results: Typical RTT presents early in childhood in a clinically recognizable fashion. Multisystem comorbidities evolve throughout the lifespan requiring coordination of care between primary care and often multiple subspecialty providers. To assist primary care providers and families in seeking best practice, a checklist and detailed references for guidance were developed by consensus.

Conclusions: The overall multisystem issues of RTT require the primary care provider to oversee and manage the whole individual and family. Given the median life expectancy well into the 6<sup>th</sup> decade, guidance is provided to primary care providers to achieve current best possible outcomes for these special-needs individuals.

## Introduction

Rett syndrome (RTT)<sup>1</sup> is a severe neurodevelopmental disorder with an estimated worldwide prevalence of between 1 in 20,000 to 40,000 people. The vast majority of individuals with RTT are female with up to 1 in 10,000 girls under the age of 12 affected<sup>2</sup>, making it one of the most common genetic causes of developmental and intellectual impairment in females<sup>3</sup>. RTT is considered a progressive disorder involving multisystem symptom evolution over time but, contrary to a long-held misconception, is not a neurodegenerative condition<sup>4</sup>. Research into the molecular pathogenesis has progressed rapidly, symptoms of the disorder have been reversed in mouse models<sup>5,6</sup>, and there is burgeoning hope for significant disease modifying therapies in the near future.

Nearly all individuals with RTT have one of >300 distinct loss-of-function mutations in the *MECP2* gene on the X-chromosome<sup>7</sup>. This gene encodes methyl-CpG binding protein-2, an essential transcriptional regulator in the brain required for normal neurodevelopment<sup>8</sup>. Complete genetic testing involves sequencing and methods to detect larger deletions (e.g. multiplex ligation-dependent probe amplification (MLPA)) of the *MECP2* gene. Likely owing to the random nature of X-chromosome inactivation<sup>9</sup> and other genetic modifiers<sup>10-12</sup>, genotype-phenotype correlations are imprecise. However, a general pattern exists with some mutations (early truncating mutations such as R168X, R255X, R270X, large deletions and specific point mutations such as R106W) associated with increased severity compared to other mutation groups (R133C, R294X, R306X, and C-terminal truncations)<sup>13</sup>. *MECP2* mutations causing RTT are almost always *de novo* (spontaneous) and as such are not expected to recur in families.

The presentation is initially subtle in the first two years of life involving developmental delays and hypotonia on exam, but subsequent symptom evolution between 18-30 months of age with developmental regression and onset of repetitive, purposeless hand movements is striking<sup>14</sup>. The core clinical diagnostic features of RTT (Table 1)<sup>1</sup> include a period of normal (or near normal) development followed by developmental regression with loss of language and hand function skills, impaired gait, and development of hand stereotypies causing life-long dependence<sup>15,16</sup>. The average age at diagnosis of 2.5 years has been trending downward with increasing availability of diagnostic genetic testing<sup>2</sup>. The



1  
2  
3 multisystem nature of the disorder has been documented within multiple observational studies with  
4 symptom risk evolving across the lifespan. Neurodevelopmental concerns are central in all patients,  
5 requiring education and management of: periodic breathing(95%<sup>17</sup>), epilepsy (90%<sup>18</sup>), tone/movement  
6 (63-84%<sup>19-21</sup>), sleep (80%<sup>22</sup>), and behavior (14%<sup>23</sup>). Additional clinical domains of relevance to the PCP  
7 include gastrointestinal (90%<sup>24</sup>), orthopedic (85%<sup>25-27</sup>), nutritional (40%<sup>24</sup>), endocrine (30%<sup>28,29</sup>), and  
8 cardiac (10-18%<sup>30,31</sup>) issues (Supplemental Table 1).

9  
10  
11  
12  
13  
14  
15  
16 In the past two decades the natural history of RTT has been extensively studied<sup>32</sup>. Perhaps most  
17 important to the primary care provider (PCP) is the knowledge that with appropriate care, children with  
18 RTT will become adults with RTT; 70% live to at least 50 years of age<sup>15,33</sup>. As such, the PCP is often  
19 presented with the daunting task of effectively coordinating attention to the evolving medical  
20 comorbidities of the disorder throughout a patient's lifespan. To help address this challenge, based on a  
21 review of published literature regarding Rett syndrome symptomatology that identified the concerns most  
22 relevant to the PCP, through a modified Delphi consensus approach we developed recommendations  
23 regarding guidance for best practice.  
24  
25  
26  
27  
28  
29  
30  
31  
32  
33  
34

### 35 **Methods**

36 Draft guidance was developed (MJ, KH and PN) and presented and discussed at bimonthly  
37 International Rett Syndrome Foundation sponsored North American Rett Syndrome Clinics Network  
38 conference calls between January 2016 through September 2018 with input obtained from 22 clinical  
39 sites. An initial draft was presented January 2017 for external review by the Network through September  
40 2018; additional public input was obtained from January 2019 to May 2019 through placement on the  
41 RettSyndrome.org website. With supervision by the group leader, the guidance was further refined  
42 substantially by eight Rett Centers (University of Alabama Birmingham, Vanderbilt University,  
43 Children's Hospital Colorado, Children's Hospital of Philadelphia, Cincinnati Children's Hospital,  
44 Boston Children's Hospital, UCSF Benioff Children's Hospital Oakland, and Texas Children's Hospital)  
45 providing multidisciplinary care for individuals with RTT, in partnership with the NIH-funded Natural  
46  
47  
48  
49  
50  
51  
52  
53  
54  
55  
56  
57  
58  
59  
60

1  
2  
3 History Study of Rett and related disorders (NHS, U54 HD061222; **ClinicalTrials.gov:**  
4 **NCT00299312/NCT02738281**) and two patient advocacy groups, Rett Syndrome Research Trust and the  
5 International Rett Syndrome Foundation. This consensus approach followed a modified Delphi process  
6 employed by members of this group previously<sup>34</sup>. The partners were chosen based on clinical experience  
7 across primary care, multiple subspecialties, health care delivery, and, importantly, patient-family  
8 experience with RTT. Conflicts of interest were vetted by the group leader with full knowledge by the  
9 group. A consensus led by the group leader surrounding guidance that should be intended for primary  
10 care providers based on published data and clinical opinion was developed through six further rounds of  
11 modifications. Search of Pubmed from 2000 to present was performed using the search terms (Rett and  
12 *MECP2* AND patient) OR (Rett and *MECP2* AND cohort). Articles related to prevalence of clinical  
13 findings were assessed with respect to the size and nature of the cohorts interrogated (Level 3) and their  
14 impact on clinical care (Supplemental Table 1). A qualitative review of 104 articles, which included  
15 small case series, the experience of the panel (each often with 100s of patients and subjects) informed the  
16 guidance (Level 4-5). The following recommendations were created based on an age-dependent health  
17 supervision approach to assist primary care providers in fulfilling the goal of effective and meaningful  
18 care for individuals with RTT across all ages (Tables 2 and 3). Items are organized by prevalence at each  
19 age group. Consistent with International Classification of Functioning, Disability and Health (ICF)  
20 guidelines (WHO , 2001)<sup>35</sup>, this guidance recognize the inter-relatedness of body function/structure,  
21 environment and personal factors to maximize activities and participation (Supplemental Table 2). Thus,  
22 in addition to routine assessment of medical issues (body function), several psychosocial, environmental,  
23 and educational concerns need to be assessed frequently to achieve the goal of family-centered service:  
24  
25  
26  
27  
28  
29  
30  
31  
32  
33  
34  
35  
36  
37  
38  
39  
40  
41  
42  
43  
44  
45  
46  
47  
48  
49  
50  
51  
52  
53  
54  
55  
56  
57  
58  
59  
60

- The financial, emotional and physical impact on the family as a whole: sibling well-being, parent physical and mental health (sleep, grief, anxiety, depression), quality of life, and marital impacts<sup>36,37</sup>.
- Vigilance regarding signs and symptoms of abuse and neglect of an at-risk individual.
- Educational support programs for which the individual may be eligible.

- Supplemental Security Income benefits.
- Personal financial, community, and emotional support available to the family.

### **Patient involvement**

Patients family groups (International Rett Syndrome Foundation and Rett Syndrome Research Trust), represented by parents of individuals with RTT (Ms. Nues and Ms. Coenraads), were involved in the development of the patient care guidance and writing of this manuscript. Their organizations will assist with dissemination of the guidance.

### **Results**

A previously employed modified Delphi approach<sup>34</sup> was utilized to obtain consensus regarding guidance for primary care providers. This was formulated into a checklist (Table 2) with further details and references (Tables 3-7) that informed the checklist and the consensus process. The guidance for management by primary care providers was grouped by relevant features and therapeutic approaches at different ages. The checklist (Table 2) is suitable for use by both the primary care provider and the family as part of their health care records with Tables 3-7 providing further detailed guidance.

*Diagnosis to 5 years old--Early Childhood:* Most features of RTT may emerge during this age period. Feeding difficulties and growth failure<sup>24,38,39</sup> begin during this age. Additional treatable gastrointestinal issues including dysmotility, gastroesophageal reflux, constipation, gas bloating, often presenting as irritability or apparent discomfort manifest commonly at this age<sup>24,40</sup>. The development of microcephaly or head growth stagnation (as early as 1.5 months)<sup>39</sup> is a common feature, though macrocephaly has also been seen<sup>41</sup>. Tone issues at this age are typically characterized by hypotonia<sup>42</sup>; early referral to therapists (physical, occupational, speech language including augmentative communication<sup>43</sup>) and establishment of an IEP<sup>44</sup> are necessary. Severe hearing loss is uncommon in RTT<sup>45</sup> but there may be delayed auditory processing<sup>46,47</sup> that mimics hearing impairment. There is increased risk of cortical visual impairment (CVI) and ocular apraxia in RTT<sup>48</sup>. There is evidence suggesting increased risk for prolonged QTc interval that may be present from a young age<sup>30,31,49</sup> and may

1  
2  
3 develop with time<sup>50</sup>. The frequency of epileptic and non-epileptic spells<sup>51,52</sup> wax and wane throughout the  
4 course<sup>18,51</sup>. Individuals with RTT generally respond to anticonvulsants<sup>18,51,53</sup> but there have been no  
5 randomized, controlled trials of specific anticonvulsants for RTT. If hospitalized, it is important to  
6 inform hospital staff that RTT individuals may need lower doses of anesthetics or analgesics<sup>54,55</sup> and may  
7 take longer to awaken from anesthesia<sup>56</sup>, and potentially confounding baseline issues: cold extremities<sup>57</sup>,  
8 irregular and disordered breathing with oxygen desaturations<sup>17,58</sup>, impaired proprioception, lack of hand  
9 use, inability to change position, and increased fall risk.

10  
11  
12  
13  
14  
15  
16  
17  
18 *5 years to the Pre-pubescent Stage--Late Childhood:* During the early school years, children with  
19 RTT typically have stabilized developmentally; the regression phase has ended<sup>39</sup>. Overall, many of the  
20 multisystem issues that arose during the first 5 years of life persist. Preventing undernutrition and  
21 maintaining a healthy BMI is important, as this has been associated with better functioning<sup>38,59</sup>.  
22 Surveillance for scoliosis becomes an important preventive measure; some children (~20%) ultimately  
23 require spinal surgery for this comorbidity<sup>60</sup>. Longitudinal assessment of pubertal development indicates  
24 an increased prevalence of early thelarche and adrenarche but delayed menarche<sup>28</sup>. Difficulties with  
25 abnormal tone in this age range typically are characterized by hypotonia evolving to rigidity<sup>19,21</sup>.

26  
27  
28  
29  
30  
31  
32  
33  
34  
35 *Post-puberty to the end of school (~21 years old)--Post-puberty:* Surveillance for scoliosis  
36 continues to be an important preventive measure though this lessens with completion of puberty<sup>28</sup>.  
37 Surveillance for urinary retention is important<sup>61,62</sup>. Biliary tract disease is seen in young adulthood at  
38 rates similar to the general population but due to communication impairment in RTT the presenting  
39 symptoms may be limited to irritability, weight loss and vomiting<sup>63,64</sup>. Studies of longevity in RTT  
40 demonstrate survival of many into middle age, underscoring the need for the early development of a  
41 comprehensive, thoughtful plan for transitioning to adulthood<sup>65</sup>. Longitudinal supervision is required in  
42 RTT as physical, behavioral and cognitive limitations will not allow for independent living<sup>15,16</sup>. This may  
43 include day programs and respite care.

44  
45  
46  
47  
48  
49  
50  
51  
52  
53  
54 *21 years and older--Adulthood:* Overall, individuals with RTT tend to stabilize clinically in  
55 young adulthood<sup>66-68</sup>. Frequent causes of hospitalization for women with RTT include pneumonia,

1  
2  
3 respiratory distress, status epilepticus, rectal bleeding, decline in ambulation, or refusal/inability to eat or  
4 drink<sup>16</sup>. While one-third of individuals may have a gastrostomy tube, half of these continue to have some  
5 oral intake<sup>33</sup>. With age, concern for low bone mineral mass coupled with long-term use of particular  
6 anticonvulsants, raises the risks for osteoporosis and bone fractures<sup>27,69,70</sup> necessitating continued  
7 supplementation and monitoring of 25-OH Vitamin D status<sup>71,72</sup>. Musculoskeletal problems and gross  
8 motor function may worsen overall<sup>67</sup> possibly due to more parkinsonian features<sup>19</sup> but with overall  
9 preservation of intellect and memory<sup>16</sup>; additional study is needed due to relatively low numbers studied.  
10 Physical limitations, parkinsonian features, and high prevalence of social withdrawal behaviors lead to  
11 abnormal or decreased social interactions consistent with anxiety or depression<sup>23</sup>. Although the majority  
12 of women with RTT in the US live at home<sup>15</sup>, in other countries only about one-third of women over age  
13 16 with RTT live at home (either full or part-time) with the majority living in a residential facility<sup>16</sup>.  
14 Long-term and individually-tailored care that provides social interactions and physical activity should be  
15 provided at all ages to reduce age-related deterioration<sup>73</sup>.

## 31 32 33 **Discussion**

34 Management of RTT requires input or expertise related to multiple specialties, often necessitating  
35 referrals to many providers in addition to the primary care provider. The above health guidance will  
36 evolve with further research into the longitudinal course of RTT by the NHS and others. However, there  
37 are limitations to the current proposed health guidance, specifically with respect to the lack of needed  
38 randomized clinical trials in a rare condition where interventions, such as physical and other therapies, are  
39 rarely standardized. At this time, longitudinal prognostic details are not well understood in certain areas  
40 of evaluation such as affect, displayed emotion and its meaning, the most appropriate manner to assess  
41 intelligence and how it evolves, or the life span of gynecologic concerns. With the relative paucity of  
42 older individuals in the NHS and related studies, further study into the care of older individuals is needed  
43 to better address guidance more extensively for both older RTT women and for those more severely  
44 affected who are not routinely captured in most studies<sup>68</sup>. Additional studies should also address the role  
45  
46  
47  
48  
49  
50  
51  
52  
53  
54  
55  
56  
57  
58  
59  
60

1  
2  
3 and utility of palliative care and banking of post-mortem tissue. From this breadth of information, quality  
4 metrics with benchmarks can be defined to ensure standards of care with best outcomes for individuals  
5 with RTT.  
6  
7  
8

9  
10 Additionally, with current and future clinical trials, the disease course for individuals with RTT  
11 may be more modifiable with severity of symptoms and disease progression very different from our  
12 current understanding. There is considerable ongoing research in the field of specific RTT therapeutics<sup>74</sup>.  
13  
14 It is therefore important for families, caregivers and primary care providers to reach out to Rett Centers  
15 and family support group resources to stay up to date on clinical trials, drug approvals, and how this  
16 impacts these current care guidance. While the primary care provider may not be able to counsel on the  
17 suitability of different clinical trials, actively engaging RTT individuals and families and referring to  
18 clinical trials at specialty centers is necessary for the development of improved therapeutics.  
19  
20  
21  
22  
23  
24  
25

26  
27 With the advances in healthcare and technology, improved and earlier genetic testing, robust  
28 research in RTT, and active patient advocacy from families and clinicians, individuals with RTT are  
29 surviving well into adulthood while living more healthy and meaningful lives. With the vast amount of  
30 medical knowledge emerging from research in RTT today and knowing the complexity of care RTT often  
31 requires, this proposed guidance can facilitate the primary care provider in delivering more thorough and  
32 well-rounded management and comprehensive surveillance. Importantly, the guidance also help to  
33 outline considerations in which the primary provider may want to refer the individual with RTT for more  
34 specialized management.  
35  
36  
37  
38  
39  
40  
41  
42

43  
44 In conclusion, Rett syndrome is a medically complex neurodevelopmental disorder impacting  
45 multiple organ systems in an evolving fashion from childhood through the 6<sup>th</sup> decade of adulthood.  
46  
47 Primary care providers are uniquely positioned to most effectively manage the individual and family to  
48 coordinate the multidisciplinary requirements of the disorder by drawing on the accumulating knowledge  
49 regarding the natural history of the disorder to anticipate these requirements.  
50  
51  
52  
53  
54  
55  
56  
57  
58  
59  
60

### Web-links for primary care providers to regional RTT clinics

<https://www.rettsyndrome.org/about-rett-syndrome/clinics>

<https://reverserett.org/newly-diagnosed/#clinics-map>

### Useful web-links for families

<https://www.rettsyndrome.org/>

<https://reverserett.org/>

<https://www.rettsyndrome.org/for-families/resources-for-families>

**Contribution Statement:** Ms. Nues, Drs. Marsh, Jones, Neul, Percy and Benke conceptualized and designed the literature search and guidance. Ms. Nues and Dr. Jones initiated a first draft of Tables 2 and 3. Drs. Fu, Armstrong, Lieberman, Marsh and Witt initiated the search and a first draft of the guidance. All authors contributed to subsequent drafts of the figure and guidance as described. Dr. Benke, as group leader, supervised and moderated the search and consensus process, initial drafts, the overall collation of the figure, tables, manuscript, and guidance. All authors approved the final manuscript as submitted and agree to be accountable for all aspects of the work.

### Acknowledgements:

We sincerely thank all of the individuals and families that have participated in this research. Thanks to Dr. Walter Kaufmann for comments on a later stage of this manuscript.

Table 1. Classic (or Typical RTT) and Atypical RTT diagnostic criteria<sup>1</sup>.

|                                                                                                                                                                                                                                                                                                                                                                                                                                                                                                                                                                                                                                                                                                                                             |
|---------------------------------------------------------------------------------------------------------------------------------------------------------------------------------------------------------------------------------------------------------------------------------------------------------------------------------------------------------------------------------------------------------------------------------------------------------------------------------------------------------------------------------------------------------------------------------------------------------------------------------------------------------------------------------------------------------------------------------------------|
| <p><b>Classic or Typical RTT diagnostic criteria</b></p> <p>A period of regression followed by recovery or stabilization</p> <ol style="list-style-type: none"> <li>1. Partial or complete loss of acquired purposeful hand skills</li> <li>2. Partial or complete loss of spoken language</li> <li>3. Gait abnormalities: impaired or absence of ability</li> <li>4. Stereotypic hand movements such as hand wringing/squeezing, clapping/tapping, mouthing and washing/rubbing automatisms.</li> </ol>                                                                                                                                                                                                                                    |
| <p><b>Atypical RTT diagnostic criteria</b></p> <p>A period of regression followed by recovery or stabilization</p> <ol style="list-style-type: none"> <li>1. At least 2 of the 4 main criteria</li> <li>2. 5 of 11 supportive criteria <ol style="list-style-type: none"> <li>a) Breathing disturbances while awake</li> <li>b) Bruxism while awake</li> <li>c) Impaired sleep</li> <li>d) Abnormal muscle tone</li> <li>e) Peripheral vasomotor disturbances</li> <li>f) Scoliosis/kyphosis</li> <li>g) Growth retardation</li> <li>h) Small cold hands and feet</li> <li>i) Inappropriate laughing/screaming spells</li> <li>j) Diminished response to pain</li> <li>k) Intense eye communication – “eye pointing”</li> </ol> </li> </ol> |



**Table 2.** Health Supervision guidance as a checklist for individuals and PCP.

| <ul style="list-style-type: none"> <li>• <b>Individuals with Rett syndrome should be seen for regular wellness checkups, screenings and immunizations (especially influenza vaccinations)*.</b></li> <li>• <b>Inform staff that extra time will be needed for visit, especially to inspecting the individual without braces, shoes and outer clothing.</b></li> <li>• <b>Parents and care-givers should keep a binder of health records to include: genetic testing results, summaries of all doctor visits (including specialist referrals), summaries of hospital admissions, laboratory studies, ECG, x-ray reports and other imaging results.</b></li> </ul> |                                                                                                                                                                                                                                                                                                                                                           |                       |                              |          |
|------------------------------------------------------------------------------------------------------------------------------------------------------------------------------------------------------------------------------------------------------------------------------------------------------------------------------------------------------------------------------------------------------------------------------------------------------------------------------------------------------------------------------------------------------------------------------------------------------------------------------------------------------------------|-----------------------------------------------------------------------------------------------------------------------------------------------------------------------------------------------------------------------------------------------------------------------------------------------------------------------------------------------------------|-----------------------|------------------------------|----------|
| Areas of Assessment                                                                                                                                                                                                                                                                                                                                                                                                                                                                                                                                                                                                                                              | Assessment Details                                                                                                                                                                                                                                                                                                                                        | Yearly Wellness Visit | Primary Care every 6 months* | Baseline |
| <b>Genetics/<br/>MECP2 Testing Results</b>                                                                                                                                                                                                                                                                                                                                                                                                                                                                                                                                                                                                                       | Counsel family on genetic test results and refer to genetic counselor if appropriate for additional counsel or explanation. Family and PCP to keep a copy of genetic results.                                                                                                                                                                             |                       |                              | ✓        |
| <b>General</b>                                                                                                                                                                                                                                                                                                                                                                                                                                                                                                                                                                                                                                                   | Update current medications and allergies                                                                                                                                                                                                                                                                                                                  |                       | At every visit               |          |
|                                                                                                                                                                                                                                                                                                                                                                                                                                                                                                                                                                                                                                                                  | Weight                                                                                                                                                                                                                                                                                                                                                    |                       | At every visit               |          |
|                                                                                                                                                                                                                                                                                                                                                                                                                                                                                                                                                                                                                                                                  | Height or body length                                                                                                                                                                                                                                                                                                                                     |                       | At every visit               |          |
|                                                                                                                                                                                                                                                                                                                                                                                                                                                                                                                                                                                                                                                                  | Body mass index                                                                                                                                                                                                                                                                                                                                           |                       | At every visit               |          |
|                                                                                                                                                                                                                                                                                                                                                                                                                                                                                                                                                                                                                                                                  | Head circumference <sup>1</sup>                                                                                                                                                                                                                                                                                                                           |                       | At every visit               |          |
|                                                                                                                                                                                                                                                                                                                                                                                                                                                                                                                                                                                                                                                                  | Tanner Stage                                                                                                                                                                                                                                                                                                                                              |                       | At yearly wellness           |          |
|                                                                                                                                                                                                                                                                                                                                                                                                                                                                                                                                                                                                                                                                  | <b>Laboratory evaluations</b> (see below)                                                                                                                                                                                                                                                                                                                 |                       | (see below)                  |          |
| <b>Gastrointestinal</b>                                                                                                                                                                                                                                                                                                                                                                                                                                                                                                                                                                                                                                          | Review: feeding methods, appetite, chewing ability, choking and length of feeding time.                                                                                                                                                                                                                                                                   | ✓                     | ✓                            |          |
|                                                                                                                                                                                                                                                                                                                                                                                                                                                                                                                                                                                                                                                                  | Screen for GE reflux, gas bloating, biliary tract disease, constipation and hemorrhoids, skin tags, or fissures.                                                                                                                                                                                                                                          | ✓                     | ✓                            |          |
| <b>Nutrition</b>                                                                                                                                                                                                                                                                                                                                                                                                                                                                                                                                                                                                                                                 | Review nutritional and herbal supplements<br>Nutrition screening <sup>2</sup> : energy, protein, fluids, sodium, potassium, calcium, and vitamin D intake.                                                                                                                                                                                                | ✓                     | ✓                            |          |
| <b>Respiratory</b>                                                                                                                                                                                                                                                                                                                                                                                                                                                                                                                                                                                                                                               | Screen for awake disordered breathing (hyperventilating, breath-holding, color change), and air swallowing.                                                                                                                                                                                                                                               | ✓                     |                              |          |
| <b>Neurology</b>                                                                                                                                                                                                                                                                                                                                                                                                                                                                                                                                                                                                                                                 | Screen for presence of seizures and spells suspicious for seizures. Record description and frequency of seizures. Encourage individual to follow-up with neurologist routinely; every 6 months if treated for seizures. If individual's weight fluctuates (more than 10-20%), request neurologist to consider adjusting anticonvulsant doses accordingly. | ✓                     | ✓                            | ✓        |
|                                                                                                                                                                                                                                                                                                                                                                                                                                                                                                                                                                                                                                                                  | Screen for abnormal movements (stereotypies and dystonia).                                                                                                                                                                                                                                                                                                | ✓                     |                              | ✓        |
| <b>Cardiology</b>                                                                                                                                                                                                                                                                                                                                                                                                                                                                                                                                                                                                                                                | Check QTc interval with ECG; if abnormal, refer to Cardiology.                                                                                                                                                                                                                                                                                            | ✓                     |                              | ✓        |
| <b>Skin</b>                                                                                                                                                                                                                                                                                                                                                                                                                                                                                                                                                                                                                                                      | Document temperature and color of hands and feet. Screen for skin breakdown from hand-mouthing or ill-fitting braces. Screen for pressure ulcers.                                                                                                                                                                                                         | ✓                     | ✓                            |          |
| <b>Orthopedics<br/>Rehabilitation</b>                                                                                                                                                                                                                                                                                                                                                                                                                                                                                                                                                                                                                            | Estimate curvature of spine. Recheck every 6 months if scoliosis present; refer to Orthopedics if > 20 degrees.                                                                                                                                                                                                                                           | ✓                     | (if scoliosis present✓)      |          |
|                                                                                                                                                                                                                                                                                                                                                                                                                                                                                                                                                                                                                                                                  | Screen for abnormal hip abduction, range of motion and leg length.                                                                                                                                                                                                                                                                                        | ✓                     | ✓                            |          |

|                            |                                                                                                                                                                                                                                                                 |   |   |   |
|----------------------------|-----------------------------------------------------------------------------------------------------------------------------------------------------------------------------------------------------------------------------------------------------------------|---|---|---|
|                            | Screen for contractures and use or need of devices to prevent them (ankle-foot orthoses and splints).                                                                                                                                                           | ✓ |   |   |
|                            | Discuss risk of fractures due to osteopenia.                                                                                                                                                                                                                    | ✓ |   |   |
|                            | Screen for needs and use of mobility aids.                                                                                                                                                                                                                      | ✓ |   |   |
| <b>Urology</b>             | Review toilet training, frequency and infrequency of urination, and urinary tract infections. Refer to urology for frequent urinary tract infections or overflow incontinence.                                                                                  | ✓ |   |   |
| <b>Development</b>         | Documentation of baseline, gains and losses of milestones. Fine motor: hand use: raking grasp, pincer grasp, rake, holding cup or spoon.<br>Gross motor: sitting, standing, and walking.<br>Language: coo, babble, laugh, words.                                | ✓ |   | ✓ |
| <b>Communication</b>       | Screen communication methods used by family and school: eye pointing, vocalizations, switches, ipad, eye-gaze device.                                                                                                                                           | ✓ |   | ✓ |
| <b>Behavioral</b>          | Screen for symptoms of anxiety and depression, such as withdrawal, screaming and irritability. Inquire about sensory processing difficulties.                                                                                                                   | ✓ | ✓ | ✓ |
| <b>Sleep</b>               | Review sleep initiation, staying asleep, snoring or coughing, and frequency of nocturnal interventions by caregivers. Review safety of bed and bedroom.                                                                                                         | ✓ | ✓ | ✓ |
| <b>Pain</b>                | Discuss delayed pain response and describe individual's response to pain.                                                                                                                                                                                       | ✓ |   |   |
| <b>Extremities</b>         | Temperature dysregulation. Review environmental factors that might impact comfort.                                                                                                                                                                              | ✓ |   |   |
| <b>Screenings</b>          | Vision screening including acuity, spatial, depth, visual fields and cortical visual impairment. Review results with parents.                                                                                                                                   | ✓ |   |   |
|                            | Audiology ABR at birth, PRN if chronic otitis media, consider evaluation for auditory processing delay <input type="checkbox"/>                                                                                                                                 | ✓ |   | ✓ |
|                            | Annual dental health screening; refer for cleaning every 6 months.                                                                                                                                                                                              | ✓ |   |   |
| <b>Education/therapies</b> | Review for presence of current IEP (see info on RettSyndrome.org)<br>Documentation of therapies (type and frequency).                                                                                                                                           | ✓ |   | ✓ |
| <b>Family/Social</b>       | Assess for family stress (financial, social, fatigue)                                                                                                                                                                                                           | ✓ | ✓ | ✓ |
| <b>Resources</b>           | Review available community, insurance resources (DMV permit, respite care etc.)<br>In adolescent individuals review plans for obtaining guardianship. PCP may be required to write Letters of Medical Necessity for equipment and sign school medication forms. |   | ✓ |   |

\*6month follow-up visit is medically necessary to screen for issues that can appear quickly, progress rapidly and require intervention

<sup>1</sup>Please see CDC or Nellhaus head circumference chart for age 0-18 years

<sup>2</sup>Please see **Food and Drink Log** (<https://www.rettsyndrome.org/pcg>) to ensure adequate calcium, vitamin D, calories and fluid intake

**LABORATORY EVALUATIONS:** CBC, chemistry panel, 25-OH-vitamin D (yearly), baseline lipid screen (fasting if possible), UA (every 2 years). If disrupted sleep or concern with restless leg syndrome, consider ferritin, serum iron, TIBC, transferrin.

**Tables 3-7. Detailed approaches to management and therapy for RTT.** References not specific to RTT noted as “See:”.

| <b>Table 3: Genetics, Neurology, Cardiology, Respiratory, and Urology</b> |                                                                       |                                                                                                                                                                                                                                                                                                                                                                                                                                                                                                                                                                                                                                                                                  |                   |
|---------------------------------------------------------------------------|-----------------------------------------------------------------------|----------------------------------------------------------------------------------------------------------------------------------------------------------------------------------------------------------------------------------------------------------------------------------------------------------------------------------------------------------------------------------------------------------------------------------------------------------------------------------------------------------------------------------------------------------------------------------------------------------------------------------------------------------------------------------|-------------------|
| <b>System/Area</b>                                                        | <b>Common concerns and questions</b>                                  | <b>Details and suggested approach</b>                                                                                                                                                                                                                                                                                                                                                                                                                                                                                                                                                                                                                                            | <b>References</b> |
| <b>Genetics</b>                                                           | <i>MECP2</i> gene                                                     | For suspicion of Rett syndrome, <i>MECP2</i> gene sequencing and MLPA testing is recommended. MLPA testing is needed to detect deletions otherwise missed by sequencing; this test is necessary if no abnormalities are found by sequencing. Referral to a geneticist or genetic counselor is recommended to review recurrence risks and answer related questions. Genetic testing results are essential for enrollment in clinical trials. Referral to a Rett Center if feasible may be useful to provide multidisciplinary care and access to clinical trials.                                                                                                                 | 2,75,76           |
| <b>Neurology</b>                                                          | Seizures and Spells                                                   | Refer to neurologist for seizures and spells suspicious for seizures with follow-up every 6 months if treated with an anticonvulsant. It is difficult to differentiate between a non-epileptic Rett Spell and a seizure (both may be present). Individuals can have multiple types of seizures. Seizure logs by the family are needed with careful description of events that includes frequency and duration. Videos of events are helpful to the neurologist. The neurologist may order a video EEG to accurately characterize whether a type of event is a seizure or not. An overnight EEG may be necessary to capture sleep; an EEG is incomplete if sleep is not captured. | 18,51-53          |
|                                                                           | Abnormal movements                                                    | Ataxic gait and an impaired spatial awareness (proprioception) are common. Stereotypical hand movements (hand-wringing, mouthing, etc) are typical. These are often disruptive to hand use. Use of splints to elbows or hand guards, which may be prescribed by an OT, may be helpful to improve hand use. Initially, most individuals have low tone that progresses over years to high tone and dystonia. Neurologist or physiatrist may prescribe neuromuscular blockade or other medications to reduce tone to maintain function and prevent contractures.                                                                                                                    | 19-21,77          |
| <b>Cardiology</b>                                                         | Abnormal ECG                                                          | Yearly ECG to check for prolonged QTc interval which can develop at any time. Referral to cardiologist if the ECG is abnormal, who may consider further studies (Holter monitor, echocardiogram) or treatment. Avoid prescription of medications that can prolong QTc interval (i.e. fluoxetine). A current ECG is needed before anesthesia.                                                                                                                                                                                                                                                                                                                                     | 30,31,49,50       |
|                                                                           | Poor circulation                                                      | Distal temperature asymmetries are common and thought to be autonomic in origin; no specific therapy is recommended.                                                                                                                                                                                                                                                                                                                                                                                                                                                                                                                                                             | 57,78,79          |
| <b>Respiratory</b>                                                        | Hyperventilation, air swallowing, breath holding, blowing raspberries | Due to autonomic dysregulation, these may occur during the day. While not purposeful, they may be triggered by anxiety. Currently, there are no medications or treatments for this. If night time apneas are present, check tonsils and consider ordering a comprehensive sleep study and related specialist referral. Breathing abnormalities may disrupt feeding.                                                                                                                                                                                                                                                                                                              | 17,58,80-82       |
| <b>Urology</b>                                                            | Urine retention                                                       | Autonomic dysfunction can lead to delayed bladder emptying and bladder distension. If present, referral to urology may be needed. Constipation can increase risk of UTIs. Toilet training can be achieved in some cases. Certain medications or poor fluid intake can cause increase risk of kidney stones.                                                                                                                                                                                                                                                                                                                                                                      | 61,62 See: 83     |

**Table 4: Gastroenterology and Nutrition**

| <b>System/Area</b>                    | <b>Common concerns and questions</b> | <b>Details and suggested approach</b>                                                                                                                                                                                                                                                                                                                                                                                                                                                                                                                                                                                                      | <b>References</b> |
|---------------------------------------|--------------------------------------|--------------------------------------------------------------------------------------------------------------------------------------------------------------------------------------------------------------------------------------------------------------------------------------------------------------------------------------------------------------------------------------------------------------------------------------------------------------------------------------------------------------------------------------------------------------------------------------------------------------------------------------------|-------------------|
| <b>Gastroenterology and Nutrition</b> | Dysmotility                          | Abdominal pain and discomfort typically are caused by reflux, gas bloating, delayed stomach emptying, biliary tract disease, or constipation; these can be empirically diagnosed and managed (see below). These will present with abdominal fullness (gas or constipation), irritability (reflux or constipation), nocturnal arousals (reflux or constipation), arching (reflux), overt reflux or emesis, burping (reflux or air swallowing). Gall bladder dysfunction, screened by abdominal ultrasound, should be considered. Referral to surgery for cholecystectomy may be necessary for symptomatic gallstones or biliary dyskinesia. | 24,38,40,64       |
|                                       | Constipation                         | This is a very common problem. Laxatives (polyethylene glycol, magnesium hydroxide, glycerin or bisacodyl suppositories) are often a part of long-term treatment with a goal of one soft bowel movement per day.                                                                                                                                                                                                                                                                                                                                                                                                                           | 24,40             |
|                                       | Reflux                               | This is a very common problem. PPI or H2 blockers are used empirically. Referral to gastroenterologist may be necessary to rule out complications such as esophagitis, ulcer, strictures, or Barrett's esophagus.                                                                                                                                                                                                                                                                                                                                                                                                                          | 24,40             |
|                                       | Poor weight gain                     | Fatigue and irritability may be signs that dietary requirements are not being met; consider energy dense foods (oils, syrups, avocado), gastroenterologist, and nutrition consults. Gastrostomy-button may be needed to maintain growth; counsel families that use of a gastrostomy button does not preclude oral feeding as long as oral feeding is safe. Use CDC/WHO growth charts to track growth and try to keep at same BMI percentile on growth curve through adolescent growth spurt. RTT-specific growth charts are also available.                                                                                                | 24,38,39,84,85    |
|                                       | Calcium/Vitamin D                    | Ensure supplemental Vitamin D intake: 600-1000 IU or more daily. Target serum levels of 25-OH-Vitamin D greater than 30-40 ng/ml. Ensure milk and dairy products to provide age-appropriate dietary calcium intakes: 1-3 y, 700 mg/d; 4-8 y, 1000 mg/d; 9-18 y, 1300 mg/d; 19 y and older, 1000 mg/d. One 8-oz glass of milk or 8-oz cup of yogurt contains 300 mg of calcium.                                                                                                                                                                                                                                                             | 27,69,70 See: 86  |
|                                       | Prolonged feeding times              | Long feeding times (more than 30 minutes) can affect quality of life for patient and family; this may be an indication that a gastrostomy button is needed.                                                                                                                                                                                                                                                                                                                                                                                                                                                                                | 59,85 See: 87     |
|                                       | Chewing/swallowing difficulties      | Referral to appropriate therapist or gastroenterologist to assess if there is concern for aspiration (coughing, choking, gagging with feeding or aspiration or unexplained pneumonia). In some cases, thickeners for liquids may be helpful to prevent aspiration versus need for a gastrostomy button.                                                                                                                                                                                                                                                                                                                                    | 24,38             |

| <b>Table 5: Orthopedics, Rehabilitation, Skin, Endocrine, and Hospitalization</b> |                                                                |                                                                                                                                                                                                                                                                                                                                                                                                                                                                                                                                                                                                                                                                                                                                                    |                          |
|-----------------------------------------------------------------------------------|----------------------------------------------------------------|----------------------------------------------------------------------------------------------------------------------------------------------------------------------------------------------------------------------------------------------------------------------------------------------------------------------------------------------------------------------------------------------------------------------------------------------------------------------------------------------------------------------------------------------------------------------------------------------------------------------------------------------------------------------------------------------------------------------------------------------------|--------------------------|
| <b>System/Area</b>                                                                | <b>Common concerns and questions</b>                           | <b>Details and suggested approach</b>                                                                                                                                                                                                                                                                                                                                                                                                                                                                                                                                                                                                                                                                                                              | <b>References</b>        |
| <b>Orthopedics, Rehabilitation</b>                                                | Scoliosis                                                      | Increased risk of neuromuscular scoliosis after age 6; risk typically abates after puberty. This can progress rapidly if present, necessitating re-observation every 6 months if present. Supine x-ray and orthopedic referral when scoliotic curvature greater than 20 degrees; correction may be indicated when greater than 40 degrees. Kyphosis is more common in ambulatory individuals.                                                                                                                                                                                                                                                                                                                                                      | 25,60,88-90              |
|                                                                                   | Increased risk of hip subluxation                              | Examine hip range of motion due to high risk for hip subluxation and contractures, as either may be source of pain and cause for irritability. X-ray-AP views of pelvis may be needed to evaluate femoral head coverage.                                                                                                                                                                                                                                                                                                                                                                                                                                                                                                                           | 91                       |
|                                                                                   | Contractures                                                   | Encourage families and caregivers to inspect all joints and practice daily range of motion, especially if mobility is reduced in an acute setting (illness or hospitalization). Consider OT and PT consults for bracing and splinting. Consider neurology and physiatry consults for neuromuscular blockade or other medications to improve tone.                                                                                                                                                                                                                                                                                                                                                                                                  | 92,93                    |
|                                                                                   | Osteopenia and fractures                                       | There is higher risk of fracture due to immobility and use of anticonvulsants. If fracture occurs, consider DEXA scan and referral to endocrine specialist (in addition to aggressive screen of calcium, vitamin D intake and 25-OH-vitamin D levels). Cause for fractures beyond osteopenia needs investigation in order to eliminate other preventable causes, such as falling out of bed (needs rails), falling at home (needs assessment of home) or non-accidental trauma.                                                                                                                                                                                                                                                                    | 26,27,69-72,84,86,94     |
|                                                                                   | Equipment                                                      | There is risks of injury due to outgrown equipment (See Skin above). Family and caregivers may need lifts, shower accommodations, bed-side toilets, etc.; these needs may be best assessed by a physiatry referral.                                                                                                                                                                                                                                                                                                                                                                                                                                                                                                                                | See: <sup>95</sup>       |
| <b>Skin</b>                                                                       | Breakdown from mouthing or equipment or lack of re-positioning | Redness persisting longer than 20 min after equipment (such as a splint) is removed is of concern for development of pressure ulcers; return to PT to re-fit equipment. OT or PT may prescribe splints on elbows or hands to prevent skin breakdown from mouthing. Decubitus ulcer may need consultation with wound specialist and equipment specialist.                                                                                                                                                                                                                                                                                                                                                                                           | 93                       |
| <b>Endocrinology, Gynecology</b>                                                  | Premature adrenarche                                           | Menarche comes later, but breast buds and pubic hair may begin earlier than in typically developing children. Periods may be irregular due to low body weight or stress; T4, TSH should be checked if periods are irregular. Counsel family to notice whether or not seizure frequency corresponds with menstrual cycle and alert neurologist. Consideration of menses suppression should be considered, especially if it disrupts the interactions with caregivers and family or hormonal fluctuations correspond with increased seizure activity. The impact of menses suppression on bone health should be considered; IUD is a consideration. Avoidance of DEPO-provera is a consideration. Well-woman examination should include breast exam. | 28,29 See: <sup>96</sup> |
| <b>Hospitalization</b>                                                            | Anesthesia sensitivity, impaired proprioception                | Individuals may need lower doses of anesthetics or analgesics. They may take longer to awaken from anesthesia. It is important to ensure anesthesiologist is aware of current medications (especially anticonvulsants and cannabis preparations), type and description of seizures, breathing abnormalities and risk of presence of prolonged QTc; a recent EKG is essential. Hospital needs to be aware of impaired proprioception, lack of hand use, inability to change position and increased fall risk. If hospitalized, family or hospital should perform daily ROM to prevent contractures.                                                                                                                                                 | 17,30,31,49,54-56,58     |

**Table 6: Psychological, Behavioral, Sleep, Pain, and Screenings**

| <b>System/Area</b>               | <b>Common concerns and questions</b>     | <b>Details and suggested approach</b>                                                                                                                                                                                                                                                                                                                                                                                                                                                                      | <b>References</b> |
|----------------------------------|------------------------------------------|------------------------------------------------------------------------------------------------------------------------------------------------------------------------------------------------------------------------------------------------------------------------------------------------------------------------------------------------------------------------------------------------------------------------------------------------------------------------------------------------------------|-------------------|
| <b>Psychological, Behavioral</b> | Issues with inattention/anxiety          | Auditory processing is delayed and may be misinterpreted as disinterest; allow for this delay when assessing non-verbal language by allowing additional time for responses to questions or commands. Behavioral inconsistency is typical and may be affected by physical factors such as sleep or environment. Assess for intolerance of excessive stimuli (i.e. bright lights, loud noises).                                                                                                              | 46,47             |
|                                  | Externalizing/internalizing behaviors    | Screen for caregiver impressions of anxiety and depression, such as withdrawal; these may become more prominent with age or in individuals with milder clinical presentations. Identify possible contributors (e.g., sedating medications, decreased social interaction, limited access to engaging activities). Consider treatment with an SSRI such as escitalopram which may have a lower risk of inducing a prolonged QTc interval.                                                                    | 16,23,68,97       |
| <b>Sleep</b>                     | Disrupted sleep                          | Circadian rhythm is often disrupted; consider melatonin to initiate sleep and trazodone or clonidine to maintain asleep. Patient may be getting out of bed, which could be unsafe; consider a tent-style bed or similar engineering controls to keep child in bed and safe. Consider ferritin, serum iron, TIBC and transferrin levels if there is disrupted sleep or concerns for restless leg syndrome and need for iron replacement. Consider overnight sleep study for snoring or pauses in breathing. | 22,98 See: 99-101 |
| <b>Pain</b>                      | Pain assessment and sensitivity          | Individuals have an atypical pain response, with higher thresholds and variable indications of pain (i.e. grimace, crying, increase in repetitive movements); typical pain scales may be difficult to interpret or apply                                                                                                                                                                                                                                                                                   | 102               |
|                                  | Increased risk of chronic pain           | Often due to GI problems (see above), dental problems, immobility and positioning. Always consider hip subluxation, vertebral compression fractures or other fractures as cause of pain.                                                                                                                                                                                                                                                                                                                   | 24,40,63,64       |
| <b>Screening: Ophthalmology</b>  | Difficult vision assessment              | Since eye gaze is the main way of communicating, assessment by practitioner familiar with special needs individuals is needed. Practitioner familiar with cortical visual impairment and ocular apraxia is needed.                                                                                                                                                                                                                                                                                         | 48,92             |
| <b>Screening: Auditory</b>       | Auditory processing delay                | Hearing is typically normal and assessments are often difficult to obtain but if chronic otitis media is present, these are needed.                                                                                                                                                                                                                                                                                                                                                                        | 45                |
| <b>Screening: Dental</b>         | Teeth grinding, increased risk of caries | Routine cleanings needed and may require anesthesia. Dental work under anesthesia should be done with proper anesthesia support at major medical institutions. Regular dental care is required to avoid tooth extraction; tooth extraction significantly interferes with oral function and is to therefore be avoided if at all possible.                                                                                                                                                                  | 77,103            |



| <b>Table 7: Development, Education, Therapies, Social, and Alternative Medications</b> |                                      |                                                                                                                                                                                                                                                                                                                                                                                                                                                                                                                                                                                                                                                                                                                                                                                                                                                                                                                                                                                                                                                                                                                                                                                                                                                                                                            |                   |
|----------------------------------------------------------------------------------------|--------------------------------------|------------------------------------------------------------------------------------------------------------------------------------------------------------------------------------------------------------------------------------------------------------------------------------------------------------------------------------------------------------------------------------------------------------------------------------------------------------------------------------------------------------------------------------------------------------------------------------------------------------------------------------------------------------------------------------------------------------------------------------------------------------------------------------------------------------------------------------------------------------------------------------------------------------------------------------------------------------------------------------------------------------------------------------------------------------------------------------------------------------------------------------------------------------------------------------------------------------------------------------------------------------------------------------------------------------|-------------------|
| <b>System/Area</b>                                                                     | <b>Common concerns and questions</b> | <b>Details and suggested approach</b>                                                                                                                                                                                                                                                                                                                                                                                                                                                                                                                                                                                                                                                                                                                                                                                                                                                                                                                                                                                                                                                                                                                                                                                                                                                                      | <b>References</b> |
| <b>Development, Education and Therapies</b>                                            | Developmental Milestones             | Developmental regression (reduced hand use and language) typically stops between 2-3 years. Skills can be maintained and possibly regained with vigorous therapies. Therapies to consider: speech therapy (ST), feeding therapy (FT), occupational therapy (OT), augmentative communication therapy (AAC), vision therapy (VT), hippotherapy (horse) and swim/pool therapy.                                                                                                                                                                                                                                                                                                                                                                                                                                                                                                                                                                                                                                                                                                                                                                                                                                                                                                                                | 43,44,48,92,104   |
|                                                                                        | IEP and therapy challenges           | Educators may not have experience with Rett syndrome. Request they focus on communication, mobility, and socialization with attention to apraxia. Educators and therapists need to be informed that the approach to therapy in Rett syndrome is different: it is about maintaining skills as well as recovery. Therapies for Rett syndrome should include occupational, physical, speech, swallow and augmentative communication. Therapy that maximizes physical activities should be life-long, as these will minimize long-term complications and maximize long-term potentials. Educational opportunities that provide intensive physical, occupational and speech therapy, especially those that provide augmentative communication, allow individuals to learn and make the best progress. If CVI is present, then a Teacher of the Visually Impaired (TVI) should be included in the IEP. This is in accordance with Free Appropriate Public Education (FAPE), an educational right of all students in the United States that is guaranteed by the Rehabilitation Act of 1973 and the Individuals with Disabilities Education Act (IDEA). Families should work with schools to develop an IEP that recognizes this; referral to a Rett Specialist may provide additional assistance in this regard. | 43,44             |
|                                                                                        | Non-verbal communication             | Alternative and augmentative communication assessments are needed. While this can be done by some speech therapists, a specific referral may be needed. Since eye gaze is typically the most effective form of communication, special eye gaze devices can give individuals a voice. These referrals should be made as early as possible to coincide with typical language development. Devices should be made available to individuals at both home and school. Home use is to be encouraged as this setting may be the longest after the child graduates from the school system.                                                                                                                                                                                                                                                                                                                                                                                                                                                                                                                                                                                                                                                                                                                         | 43,92             |
| <b>Social Concerns</b>                                                                 | Increased family stress              | Family may need respite care. Sibling reactions and their adjustment should be considered; families could provide education for extended family and friends to understand Rett syndrome through patient advocacy group websites. When appropriate, discussion of Rett genetics with older siblings of child-bearing age should be considered by referral to a genetic counselor.                                                                                                                                                                                                                                                                                                                                                                                                                                                                                                                                                                                                                                                                                                                                                                                                                                                                                                                           | 36,37,105,106     |
| <b>Alternative medications</b>                                                         | Cannabis, St John's wort, etc.       | Families should be encouraged to disclose use of alternative medications (cannabis, oils etc) to all specialists.                                                                                                                                                                                                                                                                                                                                                                                                                                                                                                                                                                                                                                                                                                                                                                                                                                                                                                                                                                                                                                                                                                                                                                                          |                   |

## References

1. Neul JL, Kaufmann WE, Glaze DG, et al. Rett syndrome: revised diagnostic criteria and nomenclature. *AnnNeurol*. 2010;68(6):944-950.
2. Fehr S, Bebbington A, Nassar N, et al. Trends in the diagnosis of Rett syndrome in Australia. *Pediatr Res*. 2011;70(3):313-319.
3. Hagberg B. Rett's syndrome: prevalence and impact on progressive severe mental retardation in girls. *Acta Paediatr Scand*. 1985;74(3):405-408.
4. Armstrong DD. Rett syndrome neuropathology review 2000. *Brain Dev*. 2001;23 Suppl 1:S72-76.
5. Guy J, Gan J, Selfridge J, Cobb S, Bird A. Reversal of neurological defects in a mouse model of Rett syndrome. *Science*. 2007;315(5815):1143-1147.
6. Sinnott SE, Hector RD, Gadalla KKE, et al. Improved MECP2 Gene Therapy Extends the Survival of MeCP2-Null Mice without Apparent Toxicity after Intracisternal Delivery. *Mol Ther Methods Clin Dev*. 2017;5:106-115.
7. Neul JL, Fang P, Barrish J, et al. Specific mutations in methyl-CpG-binding protein 2 confer different severity in Rett syndrome. *Neurology*. 2008;70(16):1313-1321.
8. Tillotson R, Bird A. The Molecular Basis of MeCP2 Function in the Brain. *J Mol Biol*. 2019.
9. Archer H, Evans J, Leonard H, et al. Correlation between clinical severity in patients with Rett syndrome with a p.R168X or p.T158M MECP2 mutation, and the direction and degree of skewing of X-chromosome inactivation. *J Med Genet*. 2007;44(2):148-152.
10. Grillo E, Lo RC, Bianciardi L, et al. Revealing the complexity of a monogenic disease: rett syndrome exome sequencing. *PLoSOne*. 2013;8(2):e56599.
11. Artuso R, Papa FT, Grillo E, et al. Investigation of modifier genes within copy number variations in Rett syndrome. *J Hum Genet*. 2011;56(7):508-515.
12. Zeev BB, Bebbington A, Ho G, et al. The common BDNF polymorphism may be a modifier of disease severity in Rett syndrome. *Neurology*. 2009;72(14):1242-1247.
13. Cuddapah VA, Pillai RB, Shekar KV, et al. Methyl-CpG-binding protein 2 (MECP2) mutation type is associated with disease severity in Rett syndrome. *J MedGenet*. 2014;51(3):152-158.
14. Hagberg B, Goutieres F, Hanefeld F, Rett A, Wilson J. Rett syndrome: criteria for inclusion and exclusion. *Brain Dev*. 1985;7(3):372-373.
15. Tarquinio DC, Hou W, Neul JL, et al. The Changing Face of Survival in Rett Syndrome and MECP2-Related Disorders. *Pediatr Neurol*. 2015;53(5):402-411.
16. Halbach N, Smeets E, Steinbusch C, Maaskant M, van WD, Curfs L. Aging in Rett syndrome: a longitudinal study. *ClinGenet*. 2012.
17. Tarquinio DC, Hou W, Neul JL, et al. The course of awake breathing disturbances across the lifespan in Rett syndrome. *Brain Dev*. 2018;40(7):515-529.
18. Tarquinio DC, Hou W, Berg A, et al. Longitudinal course of epilepsy in Rett syndrome and related disorders. *Brain*. 2017;140(2):306-318.
19. Humphreys P, Barrowman N. The Incidence and Evolution of Parkinsonian Rigidity in Rett Syndrome: A Pilot Study. *Can J Neurol Sci*. 2016;43(4):567-573.
20. Temudo T, Ramos E, Dias K, et al. Movement disorders in Rett syndrome: an analysis of 60 patients with detected MECP2 mutation and correlation with mutation type. *Mov Disord*. 2008;23(10):1384-1390.
21. FitzGerald PM, Jankovic J, Percy AK. Rett syndrome and associated movement disorders. *Mov Disord*. 1990;5(3):195-202.
22. Wong K, Leonard H, Jacoby P, Ellaway C, Downs J. The trajectories of sleep disturbances in Rett syndrome. *J Sleep Res*. 2015;24(2):223-233.
23. Buchanan CB, Stallworth JL, Scott AE, et al. Behavioral profiles in Rett syndrome: Data from the natural history study. *Brain Dev*. 2019;41(2):123-134.



24. Motil KJ, Caeg E, Barrish JO, et al. Gastrointestinal and nutritional problems occur frequently throughout life in girls and women with Rett syndrome. *J Pediatr Gastroenterol Nutr.* 2012;55(3):292-298.
25. Percy AK, Lee HS, Neul JL, et al. Profiling scoliosis in Rett syndrome. *Pediatr Res.* 2010;67(4):435-439.
26. Jefferson AL, Woodhead HJ, Fyfe S, et al. Bone mineral content and density in Rett syndrome and their contributing factors. *Pediatr Res.* 2011;69(4):293-298.
27. Motil KJ, Ellis KJ, Barrish JO, Caeg E, Glaze DG. Bone mineral content and bone mineral density are lower in older than in younger females with Rett syndrome. *Pediatr Res.* 2008;64(4):435-439.
28. Killian JT, Lane JB, Cutter GR, et al. Pubertal development in Rett syndrome deviates from typical females. *Pediatr Neurol.* 2014;51(6):769-775.
29. Stagi S, Cavalli L, Congiu L, et al. Thyroid function in Rett syndrome. *Horm Res Paediatr.* 2015;83(2):118-125.
30. Crosson J, Srivastava S, Bibat GM, et al. Evaluation of QTc in Rett syndrome: Correlation with age, severity, and genotype. *Am J Med Genet A.* 2017;173(6):1495-1501.
31. McCauley MD, Wang T, Mike E, et al. Pathogenesis of lethal cardiac arrhythmias in Mecp2 mutant mice: implication for therapy in Rett syndrome. *Sci Transl Med.* 2011;3(113):113ra125.
32. Percy AK, Neul JL, Glaze DG, et al. Rett syndrome diagnostic criteria: lessons from the Natural History Study. *Ann Neurol.* 2010;68(6):951-955.
33. Anderson A, Wong K, Jacoby P, Downs J, Leonard H. Twenty years of surveillance in Rett syndrome: what does this tell us? *Orphanet J Rare Dis.* 2014;9:87.
34. Demarest S, Pestana-Knight EM, Olson HE, et al. Severity Assessment in CDKL5 Deficiency Disorder. *Pediatr Neurol.* 2019;97:38-42.
35. Dahl TH. International classification of functioning, disability and health: an introduction and discussion of its potential impact on rehabilitation services and research. *J Rehabil Med.* 2002;34(5):201-204.
36. Killian JT, Jr., Lane JB, Lee HS, et al. Caretaker Quality of Life in Rett Syndrome: Disorder Features and Psychological Predictors. *Pediatr Neurol.* 2016;58:67-74.
37. Lane JB, Salter AR, Jones NE, et al. Assessment of Caregiver Inventory for Rett Syndrome. *J Autism Dev Disord.* 2017;47(4):1102-1112.
38. Motil KJ, Schultz RJ, Browning K, Trautwein L, Glaze DG. Oropharyngeal dysfunction and gastroesophageal dysmotility are present in girls and women with Rett syndrome. *J Pediatr Gastroenterol Nutr.* 1999;29(1):31-37.
39. Tarquinio DC, Motil KJ, Hou W, et al. Growth failure and outcome in Rett syndrome: specific growth references. *Neurology.* 2012;79(16):1653-1661.
40. Baikie G, Ravikumara M, Downs J, et al. Gastrointestinal dysmotility in Rett syndrome. *J Pediatr Gastroenterol Nutr.* 2014;58(2):237-244.
41. Sheen V, Valencia IM, Torres AR. Atypical features in MECP2 P152R-associated Rett syndrome. *Pediatr Neurol.* 2013;49(2):124-126.
42. Hollander E, Kolevzon A, Coyle JT. *Textbook of autism spectrum disorders.* 1st ed. Washington, DC: American Psychiatric Pub.; 2011.
43. Didden R, Korzilius H, Smeets E, et al. Communication in Individuals with Rett Syndrome: an Assessment of Forms and Functions. *J Dev Phys Disabil.* 2010;22(2):105-118.
44. Downs J, Rodger J, Li C, et al. Environmental enrichment intervention for Rett syndrome: an individually randomised stepped wedge trial. *Orphanet J Rare Dis.* 2018;13(1):3.
45. Pillion JP, Rawool VW, Bibat G, Naidu S. Prevalence of hearing loss in Rett syndrome. *Dev Med Child Neurol.* 2003;45(5):338-343.
46. Lenn NJ, Olsho LW, Turk WR. Auditory processing deficit in a patient with Rett syndrome. *Am J Med Genet Suppl.* 1986;1:153-156.

- 1
- 2
- 3
- 4 47. Stauder JE, Smeets EE, van Mil SG, Curfs LG. The development of visual- and auditory
- 5 processing in Rett syndrome: an ERP study. *Brain Dev.* 2006;28(8):487-494.
- 6 48. LeBlanc JJ, DeGregorio G, Centofante E, et al. Visual evoked potentials detect cortical
- 7 processing deficits in Rett syndrome. *Ann Neurol.* 2015;78(5):775-786.
- 8 49. Kerr AM, Armstrong DD, Prescott RJ, Doyle D, Kearney DL. Rett syndrome: analysis of deaths
- 9 in the British survey. *Eur Child Adolesc Psychiatry.* 1997;6 Suppl 1:71-74.
- 10 50. Clark BC, Kopp A, Morey W, Djukic A. Serial follow-up of corrected QT interval in Rett
- 11 syndrome. *Dev Med Child Neurol.* 2019.
- 12 51. Glaze DG, Percy AK, Skinner S, et al. Epilepsy and the natural history of Rett syndrome.
- 13 *Neurology.* 2010;74(11):909-912.
- 14 52. Glaze DG, Schultz RJ, Frost JD. Rett syndrome: characterization of seizures versus non-seizures.
- 15 *Electroencephalogr Clin Neurophysiol.* 1998;106(1):79-83.
- 16 53. Henriksen MW, Breck H, von Tetzchner S, Paus B, Skjeldal OH, Brodtkorb E. Epilepsy in
- 17 classic Rett syndrome: Course and characteristics in adult age. *Epilepsy Res.* 2018;145:134-139.
- 18 54. Kako H, Martin DP, Cartabuke R, Beebe A, Klamar J, Tobias JD. Perioperative management of a
- 19 patient with Rett syndrome. *Int J Clin Exp Med.* 2013;6(5):393-403.
- 20 55. Tofil NM, Buckmaster MA, Winkler MK, Callans BH, Islam MP, Percy AK. Deep sedation with
- 21 propofol in patients with Rett syndrome. *J Child Neurol.* 2006;21(3):210-213.
- 22 56. Konarzewski WH, Misso S. Rett syndrome and delayed recovery from anaesthesia. *Anaesthesia.*
- 23 1994;49(4):357.
- 24 57. Hagberg B, Aicardi J, Dias K, Ramos O. A progressive syndrome of autism, dementia, ataxia,
- 25 and loss of purposeful hand use in girls: Rett's syndrome: report of 35 cases. *Ann Neurol.*
- 26 1983;14(4):471-479.
- 27 58. Glaze DG, Frost JD, Jr., Zoghbi HY, Percy AK. Rett's syndrome: characterization of respiratory
- 28 patterns and sleep. *Ann Neurol.* 1987;21(4):377-382.
- 29 59. Motil KJ, Morrissey M, Caeg E, Barrish JO, Glaze DG. Gastrostomy placement improves height
- 30 and weight gain in girls with Rett syndrome. *J Pediatr Gastroenterol Nutr.* 2009;49(2):237-242.
- 31 60. Downs J, Torode I, Wong K, et al. The Natural History of Scoliosis in Females With Rett
- 32 Syndrome. *Spine (Phila Pa 1976).* 2016;41(10):856-863.
- 33 61. Roth JD, Pariser JJ, Stout TE, Misseri R, Elliott SP. Presentation and Management Patterns of
- 34 Lower Urinary Tract Symptoms in Adults Due to Rare Inherited Neuromuscular Diseases.
- 35 *Urology.* 2020;135:165-170.
- 36 62. Ward CS, Huang TW, Herrera JA, et al. Loss of MeCP2 Causes Urological Dysfunction and
- 37 Contributes to Death by Kidney Failure in Mouse Models of Rett Syndrome. *PLoS One.*
- 38 2016;11(11):e0165550.
- 39 63. Freilinger M, Bohm M, Lanator I, et al. Prevalence, clinical investigation, and management of
- 40 gallbladder disease in Rett syndrome. *Dev Med Child Neurol.* 2014;56(8):756-762.
- 41 64. Motil KJ, Lane JB, Barrish JO, et al. Biliary Tract Disease in Girls and Young Women with Rett
- 42 Syndrome. *J Pediatr Gastroenterol Nutr.* 2019.
- 43 65. Kirby RS, Lane JB, Childers J, et al. Longevity in Rett syndrome: analysis of the North American
- 44 Database. *J Pediatr.* 2010;156(1):135-138 e131.
- 45 66. Halbach NS, Smeets EE, Schrandner-Stumpel CT, van Schrojenstein Lantman de Valk HH,
- 46 Maaskant MA, Curfs LM. Aging in people with specific genetic syndromes: Rett syndrome. *Am J*
- 47 *MedGenetA.* 2008;146A(15):1925-1932.
- 48 67. Vignoli A, La Briola F, Peron A, et al. Medical care of adolescents and women with Rett
- 49 syndrome: an Italian study. *Am J Med Genet A.* 2012;158A(1):13-18.
- 50 68. Cianfaglione R, Clarke A, Kerr M, Hastings RP, Oliver C, Felce D. Ageing in Rett syndrome. *J*
- 51 *Intellect Disabil Res.* 2016;60(2):182-190.
- 52 69. Motil KJ, Schultz RJ, Abrams S, Ellis KJ, Glaze DG. Fractional calcium absorption is increased
- 53 in girls with Rett syndrome. *J Pediatr Gastroenterol Nutr.* 2006;42(4):419-426.
- 54
- 55
- 56
- 57
- 58
- 59
- 60

- 1  
2  
3 70. Motil KJ, Barrish JO, Neul JL, Glaze DG. Low bone mineral mass is associated with decreased  
4 bone formation and diet in girls with Rett syndrome. *J Pediatr Gastroenterol Nutr.*  
5 2014;59(3):386-392.
- 6 71. Jefferson A, Leonard H, Sifarikas A, et al. Clinical Guidelines for Management of Bone Health  
7 in Rett Syndrome Based on Expert Consensus and Available Evidence. *PLoS One.*  
8 2016;11(2):e0146824.
- 9 72. Motil KJ, Barrish JO, Lane J, et al. Vitamin D deficiency is prevalent in girls and women with  
10 Rett syndrome. *J Pediatr Gastroenterol Nutr.* 2011;53(5):569-574.
- 11 73. Lotan M, Merrick J, Kandel I, Morad M. Aging in persons with Rett syndrome: an updated  
12 review. *ScientificWorldJournal.* 2010;10:778-787.
- 13 74. Katz DM, Bird A, Coenraads M, et al. Rett Syndrome: Crossing the Threshold to Clinical  
14 Translation. *Trends Neurosci.* 2016;39(2):100-113.
- 15 75. Erlandson A, Samuelsson L, Hagberg B, Kyllerman M, Vujic M, Wahlstrom J. Multiplex  
16 ligation-dependent probe amplification (MLPA) detects large deletions in the MECP2 gene of  
17 Swedish Rett syndrome patients. *Genet Test.* 2003;7(4):329-332.
- 18 76. Gill H, Cheadle JP, Maynard J, et al. Mutation analysis in the MECP2 gene and genetic  
19 counselling for Rett syndrome. *J Med Genet.* 2003;40(5):380-384.
- 20 77. Temudo T, Oliveira P, Santos M, et al. Stereotypies in Rett syndrome: analysis of 83 patients  
21 with and without detected MECP2 mutations. *Neurology.* 2007;68(15):1183-1187.
- 22 78. Hagberg B. Clinical manifestations and stages of Rett syndrome. *Ment Retard Dev Disabil Res*  
23 *Rev.* 2002;8(2):61-65.
- 24 79. Symons FJ, Byiers B, Hoch J, et al. Infrared Thermal Analysis and Individual Differences in Skin  
25 Temperature Asymmetry in Rett Syndrome. *Pediatr Neurol.* 2015;53(2):169-172.
- 26 80. Kerr AM, Julu PO. Recent insights into hyperventilation from the study of Rett syndrome. *Arch*  
27 *Dis Child.* 1999;80(4):384-387.
- 28 81. Krajnc N. Severe respiratory dysrhythmia in Rett syndrome treated with topiramate. *J Child*  
29 *Neurol.* 2014;29(10):NP118-121.
- 30 82. Gokben S, Ardic UA, Serdaroglu G. Use of buspirone and fluoxetine for breathing problems in  
31 Rett syndrome. *Pediatr Neurol.* 2012;46(3):192-194.
- 32 83. Chu DI, Tasian GE, Copelovitch L. Pediatric Kidney Stones - Avoidance and Treatment. *Curr*  
33 *Treat Options Pediatr.* 2016;2(2):104-111.
- 34 84. Marchand V, Motil KJ, Nutrition NCo. Nutrition support for neurologically impaired children: a  
35 clinical report of the North American Society for Pediatric Gastroenterology, Hepatology, and  
36 Nutrition. *J Pediatr Gastroenterol Nutr.* 2006;43(1):123-135.
- 37 85. Leonard H, Ravikumara M, Baikie G, et al. Assessment and management of nutrition and growth  
38 in Rett syndrome. *J Pediatr Gastroenterol Nutr.* 2013;57(4):451-460.
- 39 86. In: Ross AC, Taylor CL, Yaktine AL, Del Valle HB, eds. *Dietary Reference Intakes for Calcium*  
40 *and Vitamin D.* Washington (DC)2011.
- 41 87. Cook S, Hooper V, Nasser R, Larsen D. Effect of gastrostomy on growth in children with  
42 neurodevelopmental disabilities. *Can J Diet Pract Res.* 2005;66(1):19-24.
- 43 88. Killian JT, Lane JB, Lee HS, et al. Scoliosis in Rett Syndrome: Progression, Comorbidities, and  
44 Predictors. *Pediatr Neurol.* 2017;70:20-25.
- 45 89. Downs J, Bergman A, Carter P, et al. Guidelines for management of scoliosis in Rett syndrome  
46 patients based on expert consensus and clinical evidence. *Spine (Phila Pa 1976).*  
47 2009;34(17):E607-E617.
- 48 90. Downs J, Torode I, Wong K, et al. Surgical fusion of early onset severe scoliosis increases  
49 survival in Rett syndrome: a cohort study. *Dev Med Child Neurol.* 2016;58(6):632-638.
- 50 91. Tay G, Graham H, Graham HK, Leonard H, Reddihough D, Baikie G. Hip displacement and  
51 scoliosis in Rett syndrome - screening is required. *Dev Med Child Neurol.* 2010;52(1):93-98.
- 52 92. Cass H, Reilly S, Owen L, et al. Findings from a multidisciplinary clinical case series of females  
53 with Rett syndrome. *Dev Med Child Neurol.* 2003;45(5):325-337.
- 54  
55  
56  
57  
58  
59  
60

- 1  
2  
3 93. Hirano D, Taniguchi T. Skin injuries and joint contractures of the upper extremities in Rett  
4 syndrome. *J Intellect Disabil Res.* 2018;62(1):53-59.  
5 94. Downs J, Bebbington A, Woodhead H, et al. Early determinants of fractures in Rett syndrome.  
6 *Pediatrics.* 2008;121(3):540-546.  
7 95. Freundlich K. Pressure Injuries in Medically Complex Children: A Review. *Children (Basel).*  
8 2017;4(4).  
9 96. Tauboll E, Sveberg L, Svalheim S. Interactions between hormones and epilepsy. *Seizure.*  
10 2015;28:3-11.  
11 97. Buchanan CB, Stallworth JL, Scott AE, et al. Behavioral profiles in Rett syndrome: Data from the  
12 natural history study. *Brain Dev.* 2018.  
13 98. Boban S, Leonard H, Wong K, Wilson A, Downs J. Sleep disturbances in Rett syndrome: Impact  
14 and management including use of sleep hygiene practices. *Am J Med Genet A.* 2018;176(7):1569-  
15 1577.  
16 99. Jan JE, Owens JA, Weiss MD, et al. Sleep hygiene for children with neurodevelopmental  
17 disabilities. *Pediatrics.* 2008;122(6):1343-1350.  
18 100. Dye TJ, Jain SV, Simakajornboon N. Outcomes of long-term iron supplementation in pediatric  
19 restless legs syndrome/periodic limb movement disorder (RLS/PLMD). *Sleep Med.* 2017;32:213-  
20 219.  
21 101. Aurora RN, Zak RS, Karippot A, et al. Practice parameters for the respiratory indications for  
22 polysomnography in children. *Sleep.* 2011;34(3):379-388.  
23 102. Downs J, Geranton SM, Bebbington A, et al. Linking MECP2 and pain sensitivity: the example  
24 of Rett syndrome. *Am J Med Genet A.* 2010;152A(5):1197-1205.  
25 103. Lai YYL, Wong K, King NM, Downs J, Leonard H. Oral health experiences of individuals with  
26 Rett syndrome: a retrospective study. *BMC Oral Health.* 2018;18(1):195.  
27 104. Tarquinio DC, Hou W, Neul JL, et al. Age of diagnosis in Rett syndrome: patterns of recognition  
28 among diagnosticians and risk factors for late diagnosis. *Pediatr Neurol.* 2015;52(6):585-591  
29 e582.  
30 105. Lane JB, Lee HS, Smith LW, et al. Clinical severity and quality of life in children and  
31 adolescents with Rett syndrome. *Neurology.* 2011;77(20):1812-1818.  
32 106. Mori Y, Downs J, Wong K, Leonard H. Longitudinal effects of caregiving on parental well-  
33 being: the example of Rett syndrome, a severe neurological disorder. *Eur Child Adolesc*  
34 *Psychiatry.* 2019;28(4):505-520.  
35  
36  
37  
38  
39  
40  
41  
42  
43  
44  
45  
46  
47  
48  
49  
50  
51  
52  
53  
54  
55  
56  
57  
58  
59  
60

**Supplemental Table 1. Characteristics of studies included in the meta-analysis of RTT comorbidities**

| RTT Comorbidities                                            | Studies                             | Country   | Study design    | Cohort size | Age range (years)     | Prevalence (%) |
|--------------------------------------------------------------|-------------------------------------|-----------|-----------------|-------------|-----------------------|----------------|
| <b>Neurological</b>                                          |                                     |           |                 |             |                       |                |
| Periodic breathing                                           | Tarquinio et al, 2018 <sup>1</sup>  | USA       | Prospective     | 778         | 0.7-66.5              | 95             |
| Epilepsy                                                     | Tarquinio et al, 2017 <sup>2</sup>  | USA       | Prospective     | 922         | 0.7-66.5              | 90             |
| Dysphagia                                                    | Motil et al, 2012 <sup>3</sup>      | USA       | Cross-sectional | 983         | 0-40+                 | 90             |
| Sleep dysfunction                                            | Wong et al, 2015 <sup>4</sup>       | Australia | Prospective     | 320         | 2-35.8                | 80             |
| Movement disorders                                           | Humphreys et al, 2016 <sup>5</sup>  | Canada    | Prospective     | 51          | 2.5-54                | 84             |
|                                                              | Temudo et al, 2008 <sup>6</sup>     | Portugal  | Prospective     | 60          | 5-13.5                | 63             |
|                                                              | FitzGerald et al, 1990 <sup>7</sup> | USA       | Prospective     | 32          | 2.5-28                | 63             |
| Behavioral disturbance (on medication)                       | Buchanan et al, 2019 <sup>8</sup>   | USA       | Prospective     | 861         | 3-66                  | 14             |
| <b>Gastrointestinal/Nutrition</b>                            |                                     |           |                 |             |                       |                |
| Constipation                                                 | Motil et al, 2012 <sup>3</sup>      | USA       | Cross-sectional | 983         | 0-40+                 | 80             |
| Reflux                                                       | Motil et al, 2012 <sup>3</sup>      | USA       | Cross-sectional | 983         | 0-40+                 | 40             |
| Failure to thrive                                            | Motil et al, 2012 <sup>3</sup>      | USA       | Cross-sectional | 983         | 0-40+                 | 40             |
| Gall bladder dysfunction                                     | Motil et al, 2019 <sup>9</sup>      | USA       | Cross-sectional | 271         | 7, 19 <sup>N.B.</sup> | 4              |
| <b>Cardiac</b>                                               |                                     |           |                 |             |                       |                |
| Prolonged QT interval                                        | McCauley, et al, 2011 <sup>10</sup> | USA       | Cross-sectional | 379         | 2-46                  | 18             |
|                                                              | Crosson et al, 2017 <sup>11</sup>   | USA       | Cross-sectional | 100         | 1-17                  | 10             |
| <b>Endocrine</b>                                             |                                     |           |                 |             |                       |                |
| Premature adrenarche                                         | Killian et al, 2014 <sup>12</sup>   | USA       | Prospective     | 802         | 3-70                  | 28             |
| Premature thelarche                                          | Killian et al, 2014 <sup>12</sup>   | USA       | Prospective     | 802         | 3-70                  | 25             |
| Delayed menarche                                             | Killian et al, 2014 <sup>12</sup>   | USA       | Prospective     | 802         | 3-70                  | 19             |
| Low bone mineral mass                                        | Motil et al, 2008 <sup>13</sup>     | USA       | Cross-sectional | 50          | 2-38                  | 59             |
| Thyroid dysfunction                                          | Stagi et al, 2015 <sup>14</sup>     | Italy     | Cross-sectional | 45          | 2-26.1                | 18             |
| <b>Orthopedic</b>                                            |                                     |           |                 |             |                       |                |
| Scoliosis                                                    | Percy et al, 2010 <sup>15</sup>     | USA       | Prospective     | 554         | 0-57                  | 80             |
| Hip displacement                                             | Tay et al, 2010 <sup>16</sup>       | Australia | Cross-sectional | 31          | 7-29                  | 50             |
| Fractures                                                    | Jefferson et al, 2011 <sup>17</sup> | Australia | Cross-sectional | 97          | 4-30.5                | 32             |
|                                                              | Motil et al, 2008 <sup>13</sup>     | USA       | Cross-sectional | 50          | 2-38                  | 28             |
| N.B.: Reported as 1 <sup>st</sup> , 3 <sup>rd</sup> quartile |                                     |           |                 |             |                       |                |



1  
2  
3  
4  
5  
6  
7  
8  
9  
10  
11  
12  
13  
14  
15  
16  
17  
18  
19  
20  
21  
22  
23  
24  
25  
26  
27  
28  
29  
30  
31  
32  
33  
34  
35  
36  
37  
38  
39  
40  
41  
42  
43  
44  
45  
46  
47

| <b>Supplementary Table 2. Health supervision goals surrounding individuals with RTT by ICF contextual factors</b> |                                                                                                                                                                                                                                                                                                             |                                                                                                                                                                                                                                                                                                                                                              |                                                                                                                                                                                                                                                                                                                                                                             |                                                                                                                                                                                                                                                                                                                                                                              |
|-------------------------------------------------------------------------------------------------------------------|-------------------------------------------------------------------------------------------------------------------------------------------------------------------------------------------------------------------------------------------------------------------------------------------------------------|--------------------------------------------------------------------------------------------------------------------------------------------------------------------------------------------------------------------------------------------------------------------------------------------------------------------------------------------------------------|-----------------------------------------------------------------------------------------------------------------------------------------------------------------------------------------------------------------------------------------------------------------------------------------------------------------------------------------------------------------------------|------------------------------------------------------------------------------------------------------------------------------------------------------------------------------------------------------------------------------------------------------------------------------------------------------------------------------------------------------------------------------|
|                                                                                                                   | Early Childhood                                                                                                                                                                                                                                                                                             | Late Childhood                                                                                                                                                                                                                                                                                                                                               | Post-puberty                                                                                                                                                                                                                                                                                                                                                                | Adulthood                                                                                                                                                                                                                                                                                                                                                                    |
| Body Functions and Structure                                                                                      | GI/Nutrition: Maintain adequate growth, bone health, and nutrition; manage reflux and constipation<br>Neurological: Identify and manage epilepsy when present; identify and manage autonomic dysfunction<br>Rehabilitation: develop strength and coordination<br>Cardiology: detect and manage prolonged QT | GI/Nutrition: Maintain adequate growth, bone health, and nutrition; manage reflux and constipation<br>Neurological: Identify and manage epilepsy when present; identify and manage autonomic dysfunction<br>Rehabilitation: regulate tone and prevent contractures<br>Cardiology: detect and manage prolonged QT<br>Orthopedics: detect and manage scoliosis | GI/Nutrition: Maintain nutrition and bone health; manage constipation; detect and manage gall bladder dysfunction<br>Neurological: Identify and manage epilepsy when present; identify and manage autonomic dysfunction<br>Rehabilitation: regulate tone and prevent contractures<br>Cardiology: detect and manage prolonged QT<br>Orthopedics detect and prevent fractures | GI/Nutrition: Maintain nutrition and bone health; manage constipation; detect and manage gall bladder dysfunction<br>Neurological: Identify and manage epilepsy when present; identify and manage autonomic dysfunction<br>Rehabilitation: regulate tone and prevent contractures<br>Cardiology: detect and manage prolonged QT<br>Orthopedics: detect and prevent fractures |
| Environment                                                                                                       | Education: Develop appropriate IEP<br>Therapies: Access to appropriate therapies<br>Socialization: Age-appropriate interactions and activities                                                                                                                                                              | Education: Develop appropriate IEP<br>Therapies: Access to appropriate therapies including physical, occupational, and assistive communication technologies<br>Socialization: Age-appropriate interactions and activities                                                                                                                                    | Education: Develop appropriate IEP<br>Therapies: Access to appropriate therapies including physical, occupational, and assistive communication technologies<br>Socialization: Age-appropriate interactions and activities                                                                                                                                                   | Education: Transition to Adult Daycare programs.<br>Therapies: Access to appropriate therapies including physical, occupational, and assistive communication technologies<br>Socialization: Age-appropriate interactions and activities                                                                                                                                      |

## Supplemental References

1. Tarquinio DC, Hou W, Neul JL, et al. The course of awake breathing disturbances across the lifespan in Rett syndrome. *Brain Dev.* 2018;40(7):515-529.
2. Tarquinio DC, Hou W, Berg A, et al. Longitudinal course of epilepsy in Rett syndrome and related disorders. *Brain.* 2017;140(2):306-318.
3. Motil KJ, Caeg E, Barrish JO, et al. Gastrointestinal and nutritional problems occur frequently throughout life in girls and women with Rett syndrome. *J Pediatr Gastroenterol Nutr.* 2012;55(3):292-298.
4. Wong K, Leonard H, Jacoby P, Ellaway C, Downs J. The trajectories of sleep disturbances in Rett syndrome. *J Sleep Res.* 2015;24(2):223-233.
5. Humphreys P, Barrowman N. The Incidence and Evolution of Parkinsonian Rigidity in Rett Syndrome: A Pilot Study. *Can J Neurol Sci.* 2016;43(4):567-573.
6. Temudo T, Ramos E, Dias K, et al. Movement disorders in Rett syndrome: an analysis of 60 patients with detected MECP2 mutation and correlation with mutation type. *Mov Disord.* 2008;23(10):1384-1390.
7. FitzGerald PM, Jankovic J, Percy AK. Rett syndrome and associated movement disorders. *Mov Disord.* 1990;5(3):195-202.
8. Buchanan CB, Stallworth JL, Scott AE, et al. Behavioral profiles in Rett syndrome: Data from the natural history study. *Brain Dev.* 2019;41(2):123-134.
9. Motil KJ, Lane JB, Barrish JO, et al. Biliary Tract Disease in Girls and Young Women with Rett Syndrome. *J Pediatr Gastroenterol Nutr.* 2019.
10. McCauley MD, Wang T, Mike E, et al. Pathogenesis of lethal cardiac arrhythmias in Mecp2 mutant mice: implication for therapy in Rett syndrome. *SciTranslMed.* 2011;3(113):113ra125.
11. Crosson J, Srivastava S, Bibat GM, et al. Evaluation of QTc in Rett syndrome: Correlation with age, severity, and genotype. *Am J Med Genet A.* 2017;173(6):1495-1501.
12. Killian JT, Lane JB, Cutter GR, et al. Pubertal development in Rett syndrome deviates from typical females. *Pediatr Neurol.* 2014;51(6):769-775.
13. Motil KJ, Ellis KJ, Barrish JO, Caeg E, Glaze DG. Bone mineral content and bone mineral density are lower in older than in younger females with Rett syndrome. *Pediatr Res.* 2008;64(4):435-439.
14. Stagi S, Cavalli L, Congiu L, et al. Thyroid function in Rett syndrome. *Horm Res Paediatr.* 2015;83(2):118-125.
15. Percy AK, Lee HS, Neul JL, et al. Profiling scoliosis in Rett syndrome. *Pediatr Res.* 2010;67(4):435-439.
16. Tay G, Graham H, Graham HK, Leonard H, Reddiough D, Baikie G. Hip displacement and scoliosis in Rett syndrome - screening is required. *Dev Med Child Neurol.* 2010;52(1):93-98.
17. Jefferson AL, Woodhead HJ, Fyfe S, et al. Bone mineral content and density in Rett syndrome and their contributing factors. *Pediatr Res.* 2011;69(4):293-298.

# BMJ Paediatrics Open

## Guidance for Primary Care Providers in Rett Syndrome

|                               |                                                                                                                                                                                                                                                                                                                                                                                                                                                                                                                                                                                                                                                                                                         |
|-------------------------------|---------------------------------------------------------------------------------------------------------------------------------------------------------------------------------------------------------------------------------------------------------------------------------------------------------------------------------------------------------------------------------------------------------------------------------------------------------------------------------------------------------------------------------------------------------------------------------------------------------------------------------------------------------------------------------------------------------|
| Journal:                      | <i>BMJ Paediatrics Open</i>                                                                                                                                                                                                                                                                                                                                                                                                                                                                                                                                                                                                                                                                             |
| Manuscript ID                 | bmjpo-2020-000717.R1                                                                                                                                                                                                                                                                                                                                                                                                                                                                                                                                                                                                                                                                                    |
| Article Type:                 | Original research                                                                                                                                                                                                                                                                                                                                                                                                                                                                                                                                                                                                                                                                                       |
| Date Submitted by the Author: | 14-May-2020                                                                                                                                                                                                                                                                                                                                                                                                                                                                                                                                                                                                                                                                                             |
| Complete List of Authors:     | <p>Fu, Cary<br/>         Armstrong, Dallas<br/>         Marsh, Eric<br/>         Lieberman, David<br/>         Motil, Kay<br/>         Witt, Rochelle<br/>         Standridge, Shannon<br/>         Nues, Paige<br/>         Lane, Jane<br/>         Dinkel, Tristen<br/>         Coenraads, Monica<br/>         von Hehn, Jana<br/>         Jones, Mary<br/>         Hale, Katie<br/>         Suter, Bernhard<br/>         Glaze, Daniel<br/>         Neul, Jeffrey<br/>         Percy, Alan<br/>         Benke, Timothy; University of Colorado Denver School of Medicine,<br/>         Pediatrics, Pharmacology, Neurology, Otolaryngology; Children's Hospital<br/>         Colorado, Neurology</p> |
| Keywords:                     | Neurology, Genetics, Syndrome, Rehabilitation, Gastroenterology                                                                                                                                                                                                                                                                                                                                                                                                                                                                                                                                                                                                                                         |
|                               |                                                                                                                                                                                                                                                                                                                                                                                                                                                                                                                                                                                                                                                                                                         |

SCHOLARONE™  
 Manuscripts



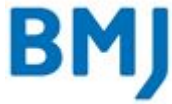

I, the Submitting Author has the right to grant and does grant on behalf of all authors of the Work (as defined in the below author licence), an exclusive licence and/or a non-exclusive licence for contributions from authors who are: i) UK Crown employees; ii) where BMJ has agreed a CC-BY licence shall apply, and/or iii) in accordance with the terms applicable for US Federal Government officers or employees acting as part of their official duties; on a worldwide, perpetual, irrevocable, royalty-free basis to BMJ Publishing Group Ltd ("BMJ") its licensees and where the relevant Journal is co-owned by BMJ to the co-owners of the Journal, to publish the Work in this journal and any other BMJ products and to exploit all rights, as set out in our [licence](#).

The Submitting Author accepts and understands that any supply made under these terms is made by BMJ to the Submitting Author unless you are acting as an employee on behalf of your employer or a postgraduate student of an affiliated institution which is paying any applicable article publishing charge ("APC") for Open Access articles. Where the Submitting Author wishes to make the Work available on an Open Access basis (and intends to pay the relevant APC), the terms of reuse of such Open Access shall be governed by a Creative Commons licence – details of these licences and which [Creative Commons](#) licence will apply to this Work are set out in our licence referred to above.

Other than as permitted in any relevant BMJ Author's Self Archiving Policies, I confirm this Work has not been accepted for publication elsewhere, is not being considered for publication elsewhere and does not duplicate material already published. I confirm all authors consent to publication of this Work and authorise the granting of this licence.

## Guidance for Primary Care Providers in Rett Syndrome

Cary Fu MD<sup>a</sup>, Dallas Armstrong MD<sup>b</sup>, Eric D. Marsh MD PhD<sup>b</sup>, David N. Lieberman MD PhD<sup>c</sup>, Kathleen J. Motil MD PhD<sup>d</sup>, Rochelle Witt MD PhD<sup>c</sup>, Shannon Standridge DO MPH<sup>e</sup>, Paige Nues<sup>f</sup>, Jane Lane RN BSN<sup>g</sup>, Tristen Dinkel CNRN CPN RN BSN<sup>h</sup>, Monica Coenraads<sup>i</sup>, Jana von Hehn PhD<sup>i</sup>, Mary Jones MD MPH<sup>j</sup>, Katie Hale RN MS PNP<sup>j</sup>, Bernhard Suter MD<sup>k</sup>, Daniel G. Glaze MD<sup>k</sup>, Jeffrey L. Neul MD PhD<sup>l</sup>, Alan Percy, MD<sup>g,m</sup>, Tim A. Benke, MD PhD<sup>h,n</sup>

### Affiliations:

<sup>a</sup>Department of Pediatrics and Neurology, Vanderbilt University Medical Center, Nashville, TN; <sup>b</sup>Division of Neurology, Children's Hospital of Philadelphia and the Department of Neurology, Perelman School of Medicine at the University of Pennsylvania, Philadelphia PA; <sup>c</sup>Department of Neurology, Boston Children's Hospital; <sup>d</sup>Baylor College of Medicine, Department of Pediatrics, USDA/ARS Children's Nutrition Research Center, Houston, TX; <sup>e</sup>Department of Pediatrics, University of Cincinnati College of Medicine, Cincinnati, OH and Division of Neurology, Cincinnati Children's Hospital Medical Center, Cincinnati, OH; <sup>f</sup>International Rett Syndrome Foundation; <sup>g</sup>University of Alabama at Birmingham, School of Medicine, Civitan International Research Center, Birmingham, AL; <sup>h</sup>Children's Hospital Colorado, Department of Neurology, Aurora, CO; <sup>i</sup>Rett Syndrome Research Trust; <sup>j</sup>UCSF Benioff Children's Hospital Oakland, Department of Pediatric Medicine, Oakland, CA; <sup>k</sup>Baylor College of Medicine, Departments of Pediatrics and Neurology and Texas Children's Hospital, Houston, TX; <sup>l</sup>Vanderbilt Kennedy Center, Vanderbilt University Medical Center, Department of Pediatrics, Pharmacology, and Special Education, Nashville, TN; <sup>m</sup>University of Alabama at Birmingham, School of Medicine, Department of Pediatrics, Neurology, Neurobiology, Genetics, and Psychology, Birmingham, AL; <sup>n</sup>University of Colorado School of Medicine, Departments of Pediatrics, Pharmacology, Neurology, and Otolaryngology, Aurora, CO.

**Corresponding author:** Tim A. Benke, MD PhD

Address: Children's Hospital Colorado, 13123 E 16<sup>th</sup>, Box B155/Neurology, Aurora, CO 80045, USA

Telephone: 303 724 3568

Email: tim.benke@cuanschutz.edu

**Short title:** Health guidance for Rett Syndrome

**Word Count:**

**Abstract: 179/300**

**Introduction: 451**

**Methods: 484**

**Results: 759**

**Discussion: 504**

**Total: 2198/2500**

**Tables: 7**

**Figures: 0**

**References: 106**

**Supplementary Tables: 1**

**Key words:** Rett syndrome, MECP2, primary care guidelines

**Funding Statement:** Cary Fu: International Rett Syndrome Foundation; Dallas Armstrong: Rett Syndrome Research Trust; Eric D. Marsh: NIH U54 HD061222, Rett Syndrome Research Trust; Rochelle M. Witt: Rett Syndrome Research Trust; David N. Lieberman: Rett Syndrome Research Trust, NIH U54 HD061222; Jane Lane: NIH U54 HD061222, Rett Syndrome Research Trust, International Rett Syndrome Foundation; Paige Nues: International Rett Syndrome Foundation; Kathleen J. Motil: International Rett Syndrome Foundation; Bernhard Suter: Blue Bird Circle, NIH U54 HD061222; Daniel G. Glaze: Blue Bird Circle, NIH U54 HD061222; Jeffery L. Neul: NIH U54 HD061222, U54 HD461222, Rett Syndrome Research Trust; Alan K. Percy: NIH U54 HD061222, Rett Syndrome Research Trust; Tim A. Benke: International Rett Syndrome Foundation, Rett Syndrome Research Trust, NIH U54 HD061222, Children's Hospital Colorado Foundation Ponzio Family Chair in Neurology Research.

**Competing Interest Statement:** Eric D. Marsh: Funding from the NIH and International Rett Syndrome Foundation; clinical trials with GW Pharmaceuticals, Zogenix, Marinus; Consultancy to Stoke therapeutics. David N. Lieberman: Consultancy for AveXis, clinical trials with Acadia, Anavex, GW Pharmaceuticals,. Shannon Standridge: Speaker Bureau for GW Pharmaceuticals. Bernhard Suter: Funding from the NIH and Blue Bird Circle; clinical trials with Acadia. Daniel G. Glaze: Funding from the NIH and Blue Bird Circle; clinical trials with GW Pharmaceuticals, Acadia, Anavex, Newron; Consultancy for Acadia and Trend Community Pharmaceuticals. Jeffery L. Neul: Funding from the NIH; Consultancy with Acadia, AveXis, Biohaven, GW Pharmaceuticals, Kurro, Neuren, Newron, Ovid, Takeda, and Teva. Jane Lane: Funding from NIH; Consultancy from International Rett Syndrome Foundation and GW Pharmaceuticals. Alan K. Percy: Funding from the NIH; Consultancy for Anavex, AveXis, Acadia, and GW Pharmaceuticals; Clinical Trials with Anavex, Acadia, GW Pharmaceuticals, and RSRT; Tim A. Benke: Funding from the NIH, International Foundation for CDKL5 Research, and Loulou Foundation. Consultancy for AveXis, Ovid, GW Pharmaceuticals, International Rett Syndrome Foundation, Takeda, and Marinus; Clinical Trials with Acadia, Ovid, GW Pharmaceuticals, Marinus and RSRT; All remuneration has been made to his department. The other authors have indicated they have no financial relationships relevant to this article to disclose.

**Abbreviations:**

ABR: auditory brainstem response

AAC: augmentative and alternative communication

CVI: cortical visual impairment

DMV: department of motor vehicle

EI: Early Intervention

ICF: International Classification of Functioning, Disability and Health

IEP: Individualized Education Program

NHS: NIH-funded Natural History Study of Rett and related disorders

PCP: primary care provider

RTT: Rett Syndrome

TVI: teacher of the visually impaired

**Summary Box:**

**What is known:** Rett syndrome (RTT) is a multi-system and rare genetic disorder with similarities to other developmental encephalopathies. There are no peer-reviewed consensus-based therapeutic guidance to care in RTT.

**What this study adds:** The primary care provider plays a key role in recognizing, treating and directing care of patients with RTT. A consensus on guidance for the primary care provider was developed based on literature review and expert opinion. This guidance is applicable to other rare and often severe neurodevelopmental disorders.

**Abstract**

Background: Rett syndrome (RTT) is a severe neurodevelopmental disorder with complex medical comorbidities extending beyond the nervous system requiring the attention of primary care providers. There are no peer-reviewed consensus-based therapeutic guidance to care in RTT. The objective was to provide consensus on guidance of best practice for addressing these concerns.

Methods: Informed by the literature and using a modified Delphi approach, a consensus process was utilized to develop guidance for care in RTT by primary care providers.

Results: Typical RTT presents early in childhood in a clinically recognizable fashion. Multisystem comorbidities evolve throughout the lifespan requiring coordination of care between primary care and often multiple subspecialty providers. To assist primary care providers and families in seeking best practice, a checklist and detailed references for guidance were developed by consensus.

Conclusions: The overall multisystem issues of RTT require the primary care provider to oversee and manage the whole individual and family. Given the median life expectancy well into the 6<sup>th</sup> decade, guidance is provided to primary care providers to achieve current best possible outcomes for these special-needs individuals.

## Introduction

Rett syndrome (RTT)<sup>1</sup> is a severe neurodevelopmental disorder with an estimated worldwide prevalence of between 1 in 20,000 to 40,000 people. RTT is one of the most common genetic causes of developmental and intellectual impairment in females<sup>2</sup>, affecting up to 1 in 10,000 girls under the age of 12. RTT is not a neurodegenerative condition<sup>3</sup>, rather it is a progressive disorder involving multisystem symptom evolution over time. Following demonstration of symptom reversal in mouse models<sup>4,5</sup>, there is flourishing hope for further disease modifying therapies.

Nearly all individuals with RTT have one of >300 distinct loss-of-function mutations in the *MECP2* gene on the X-chromosome<sup>6</sup>. This gene encodes methyl-CpG binding protein-2, an essential transcriptional regulator in the brain required for normal neurodevelopment<sup>7</sup>. Complete genetic testing involves sequencing and methods to detect larger deletions (e.g. multiplex ligation-dependent probe amplification (MLPA)) of the *MECP2* gene. Likely owing to the random nature of X-chromosome inactivation<sup>8</sup> and other genetic modifiers<sup>9-11</sup>, genotype-phenotype correlations are imprecise. However, a general pattern exists with some mutations (early truncating mutations such as R168X, R255X, R270X, large deletions and specific point mutations such as R106W) associated with increased severity compared to other mutation groups (R133C, R294X, R306X, and C-terminal truncations)<sup>12</sup>. *MECP2* mutations causing RTT are almost always *de novo* (spontaneous) and as such are not expected to recur in families.

The presentation is initially subtle in the first two years of life involving developmental delays and hypotonia on exam, but subsequent symptom evolution between 18-30 months of age with developmental regression and onset of repetitive, purposeless hand movements is striking<sup>13</sup>. The core clinical diagnostic features of RTT (Table 1)<sup>1</sup> include a period of normal (or near normal) development followed by developmental regression with loss of language and hand function skills, impaired gait, and development of hand stereotypies causing life-long dependence<sup>14,15</sup>. The average age at diagnosis of 2.5 years has been trending downward with increasing availability of diagnostic genetic testing<sup>16</sup>. The multisystem nature of the disorder has been documented within multiple observational studies with symptom risk evolving across the lifespan.

1  
2  
3 In the past two decades the natural history of RTT has been extensively studied<sup>17</sup>. Perhaps most  
4 important to the primary care provider (PCP) is the knowledge that with appropriate care, children with  
5 RTT will become adults with RTT; 70% live to at least 50 years of age<sup>14,18</sup>. As such, the PCP is often  
6 presented with the daunting task of effectively coordinating attention to the evolving medical  
7 comorbidities of the disorder throughout a patient's lifespan. To help address this challenge, based on a  
8 review of published literature regarding Rett syndrome symptomatology that identified the concerns most  
9 relevant to the PCP, through a modified Delphi consensus approach we developed recommendations  
10 regarding guidance for best practice.  
11  
12  
13  
14  
15  
16  
17  
18  
19  
20  
21

## 22 **Methods**

23  
24 Draft guidance was developed (MJ, KH and PN) and presented and discussed at bimonthly  
25 International Rett Syndrome Foundation sponsored North American Rett Syndrome Clinics Network  
26 conference calls between January 2016 through September 2018 with input obtained from 22 clinical  
27 sites. An initial draft was presented January 2017 for external review by the Network through September  
28 2018; additional public input was obtained from January 2019 to May 2019 through placement on the  
29 RettSyndrome.org website. With supervision by the group leader, the guidance was further refined  
30 substantially by eight Rett Centers (University of Alabama Birmingham, Vanderbilt University,  
31 Children's Hospital Colorado, Children's Hospital of Philadelphia, Cincinnati Children's Hospital,  
32 Boston Children's Hospital, UCSF Benioff Children's Hospital Oakland, and Texas Children's Hospital)  
33 providing multidisciplinary care for individuals with RTT, in partnership with the NIH-funded Natural  
34 History Study of Rett and related disorders (NHS, U54 HD061222; **ClinicalTrials.gov:**  
35 **NCT00299312/NCT02738281**) and two patient advocacy groups, Rett Syndrome Research Trust and the  
36 International Rett Syndrome Foundation. This consensus approach followed a modified Delphi process  
37 employed by members of this group previously<sup>19</sup>. The partners were chosen based on clinical experience  
38 across primary care, multiple subspecialties, health care delivery, and, importantly, patient-family  
39 experience with RTT. Conflicts of interest were vetted by the group leader with full knowledge by the  
40  
41  
42  
43  
44  
45  
46  
47  
48  
49  
50  
51  
52  
53  
54  
55  
56  
57  
58  
59  
60

1  
2  
3 group. A consensus led by the group leader surrounding guidance that should be intended for primary  
4 care providers based on published data and clinical opinion was developed through six further rounds of  
5 modifications. The results of a systematic review were used to inform the guidance (Fu et al, in  
6 preparation). The following recommendations were created based on an age-dependent health  
7 supervision approach to assist primary care providers in fulfilling the goal of effective and meaningful  
8 care for individuals with RTT across all ages (Tables 2 and 3). Items are organized by prevalence at each  
9 age group. Consistent with International Classification of Functioning, Disability and Health (ICF)  
10 guidelines (WHO , 2001)<sup>20</sup>, this guidance recognize the inter-relatedness of body function/structure,  
11 environment and personal factors to maximize activities and participation (Supplemental Table 1). Thus,  
12 in addition to routine assessment of medical issues (body function), several psychosocial, environmental,  
13 and educational concerns need to be assessed frequently to achieve the goal of family-centered service:  
14  
15

- 16 • The financial, emotional and physical impact on the family as a whole: sibling well-being, parent  
17 physical and mental health (sleep, grief, anxiety, depression), quality of life, and marital impacts<sup>21,22</sup>.
- 18 • Vigilance regarding signs and symptoms of abuse and neglect of an at-risk individual.
- 19 • Educational support programs for which the individual may be eligible.
- 20 • Supplemental Security Income benefits.
- 21 • Personal financial, community, and emotional support available to the family.

### 22 **Patient involvement**

23 Patients family groups (International Rett Syndrome Foundation and Rett Syndrome Research  
24 Trust), represented by parents of individuals with RTT (Ms. Nues and Ms. Coenraads), were involved in  
25 the development of the patient care guidance and writing of this manuscript. Their organizations will  
26 assist with dissemination of the guidance.  
27  
28  
29  
30  
31  
32  
33  
34  
35  
36  
37  
38

### 39 **Results**



1  
2  
3 The guidance was formulated into a checklist (Table 2) with further details and references (Tables  
4 3-7) that informed the checklist and the consensus process. The guidance for management by primary  
5 care providers was grouped by relevant features and therapeutic approaches at different ages. The  
6 checklist (Table 2) is suitable for use by both the primary care provider and the family as part of their  
7 health care records with Tables 3-7 providing further detailed guidance.  
8  
9

10  
11  
12  
13 *Diagnosis to 5 years old--Early Childhood:* Most features of RTT may emerge during this age  
14 period. Feeding difficulties and growth failure<sup>23-25</sup> begin during this age. Additional treatable  
15 gastrointestinal issues including dysmotility, gastroesophageal reflux, constipation, gas bloating, often  
16 presenting as irritability or apparent discomfort manifest commonly at this age<sup>23,26</sup>. The development of  
17 microcephaly or head growth stagnation (as early as 1.5 months)<sup>25</sup> is a common feature, though  
18 macrocephaly has also been seen<sup>27</sup>. Tone issues at this age are typically characterized by hypotonia<sup>28</sup>;  
19 early referral to therapists (physical, occupational, speech language including augmentative  
20 communication<sup>29</sup>) and establishment of an IEP<sup>30</sup> are necessary. Severe hearing loss is uncommon in  
21 RTT<sup>31</sup> but there may be delayed auditory processing<sup>32,33</sup> that mimics hearing impairment. There is  
22 increased risk of cortical visual impairment (CVI) and ocular apraxia in RTT<sup>34</sup>. There is evidence  
23 suggesting increased risk for prolonged QTc interval that may be present from a young age<sup>35-37</sup> and may  
24 develop with time<sup>38</sup>. The frequency of epileptic and non-epileptic spells<sup>39,40</sup> wax and wane throughout the  
25 course<sup>39,41</sup>. Individuals with RTT generally respond to anticonvulsants<sup>39,41,42</sup> but there have been no  
26 randomized, controlled trials of specific anticonvulsants for RTT. If hospitalized, it is important to  
27 inform hospital staff that RTT individuals may need lower doses of anesthetics or analgesics<sup>43,44</sup> and may  
28 take longer to awaken from anesthesia<sup>45</sup>, and potentially confounding baseline issues: cold extremities<sup>46</sup>,  
29 irregular and disordered breathing with oxygen desaturations<sup>47,48</sup>, impaired proprioception, lack of hand  
30 use, inability to change position, and increased fall risk.  
31  
32  
33  
34  
35  
36  
37  
38  
39  
40  
41  
42  
43  
44  
45  
46  
47  
48  
49  
50

51 *5 years to the Pre-pubescent Stage--Late Childhood:* During the early school years, children with  
52 RTT typically have stabilized developmentally; the regression phase has ended<sup>25</sup>. Overall, many of the  
53 multisystem issues that arose during the first 5 years of life persist. Preventing undernutrition and  
54  
55  
56  
57  
58  
59  
60

1  
2  
3 maintaining a healthy BMI is important, as this has been associated with better functioning<sup>24,49</sup>.

4  
5 Surveillance for scoliosis becomes an important preventive measure; some children (~20%) ultimately  
6  
7 require spinal surgery for this comorbidity<sup>50</sup>. Longitudinal assessment of pubertal development indicates  
8  
9 an increased prevalence of early thelarche and adrenarche but delayed menarche<sup>51</sup>. Difficulties with  
10  
11 abnormal tone in this age range typically are characterized by hypotonia evolving to rigidity<sup>52,53</sup>.

12  
13 *Post-puberty to the end of school (~21 years old)--Post-puberty:* Surveillance for scoliosis  
14  
15 continues to be an important preventive measure though this lessens with completion of puberty<sup>51</sup>.  
16  
17 Surveillance for urinary retention is important<sup>54,55</sup>. Biliary tract disease is seen in young adulthood at  
18  
19 rates similar to the general population but due to communication impairment in RTT the presenting  
20  
21 symptoms may be limited to irritability, weight loss and vomiting<sup>56,57</sup>. Studies of longevity in RTT  
22  
23 demonstrate survival of many into middle age, underscoring the need for the early development of a  
24  
25 comprehensive, thoughtful plan for transitioning to adulthood<sup>58</sup>. Longitudinal supervision is required in  
26  
27 RTT as physical, behavioral and cognitive limitations will not allow for independent living<sup>14,15</sup>. This may  
28  
29 include day programs and respite care.  
30  
31

32  
33 *21 years and older--Adulthood:* Overall, individuals with RTT tend to stabilize clinically in  
34  
35 young adulthood<sup>59-61</sup>. Frequent causes of hospitalization for women with RTT include pneumonia,  
36  
37 respiratory distress, status epilepticus, rectal bleeding, decline in ambulation, or refusal/inability to eat or  
38  
39 drink<sup>15</sup>. While one-third of individuals may have a gastrostomy tube, half of these continue to have some  
40  
41 oral intake<sup>18</sup>. With age, concern for low bone mineral mass coupled with long-term use of particular  
42  
43 anticonvulsants, raises the risks for osteoporosis and bone fractures<sup>62-64</sup> necessitating continued  
44  
45 supplementation and monitoring of 25-OH Vitamin D status<sup>65,66</sup>. Musculoskeletal problems and gross  
46  
47 motor function may worsen overall<sup>60</sup> possibly due to more parkinsonian features<sup>52</sup> but with overall  
48  
49 preservation of intellect and memory<sup>15</sup>; additional study is needed due to relatively low numbers studied.  
50  
51 Physical limitations, parkinsonian features, and high prevalence of social withdrawal behaviors lead to  
52  
53 abnormal or decreased social interactions consistent with anxiety or depression<sup>67</sup>. Although the majority  
54  
55 of women with RTT in the US live at home<sup>14</sup>, in other countries only about one-third of women over age  
56  
57  
58  
59  
60

1  
2  
3 16 with RTT live at home (either full or part-time) with the majority living in a residential facility<sup>15</sup>.

4  
5 Long-term and individually-tailored care that provides social interactions and physical activity should be  
6  
7 provided at all ages to reduce age-related deterioration<sup>68</sup>.

## 10 11 12 **Discussion**

13  
14 Management of RTT requires input or expertise related to multiple specialties, often necessitating  
15 referrals to many providers in addition to the primary care provider. The above health guidance will  
16 evolve with further research into the longitudinal course of RTT by the NHS and others. However, there  
17 are limitations to the current proposed health guidance, specifically with respect to the lack of needed  
18 randomized clinical trials in a rare condition where interventions, such as physical and other therapies, are  
19 rarely standardized. At this time, longitudinal prognostic details are not well understood in certain areas  
20 of evaluation such as affect, displayed emotion and its meaning, the most appropriate manner to assess  
21 intelligence and how it evolves, or the life span of gynecologic concerns. Additional studies should also  
22 address the role and utility of palliative care and banking of post-mortem tissue. From this breadth of  
23 information, quality metrics with benchmarks can be defined to ensure standards of care with best  
24 outcomes for individuals with RTT.  
25  
26  
27  
28  
29  
30  
31  
32  
33  
34  
35

36  
37 With the relative paucity of older individuals in the NHS and related studies, further study into  
38 the care of older individuals is needed to better address guidance more extensively for both older RTT  
39 women and for those more severely affected who are not routinely captured in most studies<sup>61</sup>.

40  
41 Additionally, with current and future clinical trials, the disease course for individuals with RTT may be  
42 more modifiable with severity of symptoms and disease progression very different from our current  
43 understanding. There is considerable ongoing research in the field of specific RTT therapeutics<sup>69</sup>. It is  
44 therefore important for families, caregivers and primary care providers to reach out to Rett Centers and  
45 family support group resources to stay up to date on clinical trials, drug approvals, and how this impacts  
46 these current care guidance. While the primary care provider may not be able to counsel on the suitability  
47  
48  
49  
50  
51  
52  
53  
54  
55  
56  
57  
58  
59  
60

1  
2  
3 of different clinical trials, actively engaging RTT individuals and families and referring to clinical trials at  
4 specialty centers is necessary for the development of improved therapeutics.  
5  
6

7 With the advances in healthcare and technology, improved and earlier genetic testing, robust  
8 research in RTT, and active patient advocacy from families and clinicians, individuals with RTT are  
9 surviving well into adulthood while living more healthy and meaningful lives. With the vast amount of  
10 medical knowledge emerging from research in RTT today and knowing the complexity of care RTT often  
11 requires, this proposed guidance can facilitate the primary care provider in delivering more thorough and  
12 well-rounded management and comprehensive surveillance. Importantly, the guidance also help to  
13 outline considerations in which the primary provider may want to refer the individual with RTT for more  
14 specialized management.  
15  
16  
17  
18  
19  
20  
21  
22  
23

24 In conclusion, Rett syndrome is a medically complex neurodevelopmental disorder impacting  
25 multiple organ systems in an evolving fashion from childhood through the 6<sup>th</sup> decade of adulthood.  
26 Primary care providers are uniquely positioned to most effectively manage the individual and family to  
27 coordinate the multidisciplinary requirements of the disorder by drawing on the accumulating knowledge  
28 regarding the natural history of the disorder to anticipate these requirements.  
29  
30  
31  
32  
33  
34  
35  
36  
37  
38

### 39 **Web-links for primary care providers to regional RTT clinics**

40  
41 <https://www.rettsyndrome.org/about-rett-syndrome/clinics>

42  
43 <https://reverserett.org/newly-diagnosed/#clinics-map>

### 44 45 46 47 **Useful web-links for families**

48  
49 <https://www.rettsyndrome.org/>

50  
51 <https://reverserett.org/>

52  
53 <https://www.rettsyndrome.org/for-families/resources-for-families>

1  
2  
3 **Contribution Statement:** Ms. Nues, Drs. Marsh, Jones, Neul, Percy and Benke conceptualized and  
4 designed the literature search and guidance. Ms. Nues and Dr. Jones initiated a first draft of Tables 2 and  
5 3. Drs. Fu, Armstrong, Lieberman, Marsh and Witt initiated the search and a first draft of the guidance.  
6 All authors participated in the consensus process in developing the guidance as described. Dr. Benke, as  
7 group leader, supervised and moderated the consensus process, initial drafts of the manuscript, the overall  
8 collation of the tables, manuscript, and guidance. All authors approved the final manuscript as submitted  
9 and agree to be accountable for all aspects of the work.  
10

11  
12 **Acknowledgements:**

13 We sincerely thank all of the individuals and families that have participated in this research. Thanks to Dr.  
14 Walter Kaufmann for comments on a later stage of this manuscript.  
15  
16  
17  
18  
19  
20  
21  
22  
23  
24  
25  
26  
27  
28  
29  
30  
31  
32  
33  
34  
35  
36  
37  
38  
39  
40  
41  
42  
43  
44  
45  
46  
47  
48  
49  
50  
51  
52  
53  
54  
55  
56  
57  
58  
59  
60

Table 1. Classic (or Typical RTT) and Atypical RTT diagnostic criteria<sup>1</sup>.

**Classic or Typical RTT diagnostic criteria**

A period of regression followed by recovery or stabilization

1. Partial or complete loss of acquired purposeful hand skills

2. Partial or complete loss of spoken language

3. Gait abnormalities: impaired or absence of ability

4. Stereotypic hand movements such as hand wringing/squeezing, clapping/tapping, mouthing and washing/rubbing automatisms.

**Atypical RTT diagnostic criteria**

A period of regression followed by recovery or stabilization

1. At least 2 of the 4 main criteria

2. 5 of 11 supportive criteria

a) Breathing disturbances while awake

b) Bruxism while awake

c) Impaired sleep

d) Abnormal muscle tone

e) Peripheral vasomotor disturbances

f) Scoliosis/kyphosis

g) Growth retardation

h) Small cold hands and feet

i) Inappropriate laughing/screaming spells

j) Diminished response to pain

k) Intense eye communication – “eye pointing”

**Table 2.** Health Supervision guidance as a checklist for individuals and PCP.

| <ul style="list-style-type: none"> <li>• <b>Individuals with Rett syndrome should be seen for regular wellness checkups, screenings and immunizations (especially influenza vaccinations)*.</b></li> <li>• <b>Inform staff that extra time will be needed for visit, especially to inspecting the individual without braces, shoes and outer clothing.</b></li> <li>• <b>Parents and care-givers should keep a binder of health records to include: genetic testing results, summaries of all doctor visits (including specialist referrals), summaries of hospital admissions, laboratory studies, ECG, x-ray reports and other imaging results.</b></li> </ul> |                                                                                                                                                                                                                                                                                                                                                           |                       |                              |          |
|------------------------------------------------------------------------------------------------------------------------------------------------------------------------------------------------------------------------------------------------------------------------------------------------------------------------------------------------------------------------------------------------------------------------------------------------------------------------------------------------------------------------------------------------------------------------------------------------------------------------------------------------------------------|-----------------------------------------------------------------------------------------------------------------------------------------------------------------------------------------------------------------------------------------------------------------------------------------------------------------------------------------------------------|-----------------------|------------------------------|----------|
| Areas of Assessment                                                                                                                                                                                                                                                                                                                                                                                                                                                                                                                                                                                                                                              | Assessment Details                                                                                                                                                                                                                                                                                                                                        | Yearly Wellness Visit | Primary Care every 6 months* | Baseline |
| <b>Genetics/<br/>MECP2 Testing Results</b>                                                                                                                                                                                                                                                                                                                                                                                                                                                                                                                                                                                                                       | Counsel family on genetic test results and refer to genetic counselor if appropriate for additional counsel or explanation. Family and PCP to keep a copy of genetic results.                                                                                                                                                                             |                       |                              | ✓        |
| <b>General</b>                                                                                                                                                                                                                                                                                                                                                                                                                                                                                                                                                                                                                                                   | Update current medications and allergies                                                                                                                                                                                                                                                                                                                  |                       | At every visit               |          |
|                                                                                                                                                                                                                                                                                                                                                                                                                                                                                                                                                                                                                                                                  | Weight                                                                                                                                                                                                                                                                                                                                                    |                       | At every visit               |          |
|                                                                                                                                                                                                                                                                                                                                                                                                                                                                                                                                                                                                                                                                  | Height or body length                                                                                                                                                                                                                                                                                                                                     |                       | At every visit               |          |
|                                                                                                                                                                                                                                                                                                                                                                                                                                                                                                                                                                                                                                                                  | Body mass index                                                                                                                                                                                                                                                                                                                                           |                       | At every visit               |          |
|                                                                                                                                                                                                                                                                                                                                                                                                                                                                                                                                                                                                                                                                  | Head circumference <sup>1</sup>                                                                                                                                                                                                                                                                                                                           |                       | At every visit               |          |
|                                                                                                                                                                                                                                                                                                                                                                                                                                                                                                                                                                                                                                                                  | Tanner Stage                                                                                                                                                                                                                                                                                                                                              |                       | At yearly wellness           |          |
|                                                                                                                                                                                                                                                                                                                                                                                                                                                                                                                                                                                                                                                                  | <b>Laboratory evaluations</b> (see below)                                                                                                                                                                                                                                                                                                                 |                       | (see below)                  |          |
| <b>Gastrointestinal</b>                                                                                                                                                                                                                                                                                                                                                                                                                                                                                                                                                                                                                                          | Review: feeding methods, appetite, chewing ability, choking and length of feeding time.                                                                                                                                                                                                                                                                   | ✓                     | ✓                            |          |
|                                                                                                                                                                                                                                                                                                                                                                                                                                                                                                                                                                                                                                                                  | Screen for GE reflux, gas bloating, biliary tract disease, constipation and hemorrhoids, skin tags, or fissures.                                                                                                                                                                                                                                          | ✓                     | ✓                            |          |
| <b>Nutrition</b>                                                                                                                                                                                                                                                                                                                                                                                                                                                                                                                                                                                                                                                 | Review nutritional and herbal supplements<br>Nutrition screening <sup>2</sup> : energy, protein, fluids, sodium, potassium, calcium, and vitamin D intake.                                                                                                                                                                                                | ✓                     | ✓                            |          |
| <b>Respiratory</b>                                                                                                                                                                                                                                                                                                                                                                                                                                                                                                                                                                                                                                               | Screen for awake disordered breathing (hyperventilating, breath-holding, color change), and air swallowing.                                                                                                                                                                                                                                               | ✓                     |                              |          |
| <b>Neurology</b>                                                                                                                                                                                                                                                                                                                                                                                                                                                                                                                                                                                                                                                 | Screen for presence of seizures and spells suspicious for seizures. Record description and frequency of seizures. Encourage individual to follow-up with neurologist routinely; every 6 months if treated for seizures. If individual's weight fluctuates (more than 10-20%), request neurologist to consider adjusting anticonvulsant doses accordingly. | ✓                     | ✓                            | ✓        |
|                                                                                                                                                                                                                                                                                                                                                                                                                                                                                                                                                                                                                                                                  | Screen for abnormal movements (stereotypies and dystonia).                                                                                                                                                                                                                                                                                                | ✓                     |                              | ✓        |
| <b>Cardiology</b>                                                                                                                                                                                                                                                                                                                                                                                                                                                                                                                                                                                                                                                | Check QTc interval with ECG; if abnormal, refer to Cardiology.                                                                                                                                                                                                                                                                                            | ✓                     |                              | ✓        |
| <b>Skin</b>                                                                                                                                                                                                                                                                                                                                                                                                                                                                                                                                                                                                                                                      | Document temperature and color of hands and feet. Screen for skin breakdown from hand-mouthing or ill-fitting braces. Screen for pressure ulcers.                                                                                                                                                                                                         | ✓                     | ✓                            |          |
| <b>Orthopedics<br/>Rehabilitation</b>                                                                                                                                                                                                                                                                                                                                                                                                                                                                                                                                                                                                                            | Estimate curvature of spine. Recheck every 6 months if scoliosis present; refer to Orthopedics if > 20 degrees.                                                                                                                                                                                                                                           | ✓                     | (if scoliosis present✓)      |          |
|                                                                                                                                                                                                                                                                                                                                                                                                                                                                                                                                                                                                                                                                  | Screen for abnormal hip abduction, range of motion and leg length.                                                                                                                                                                                                                                                                                        | ✓                     | ✓                            |          |



|                            |                                                                                                                                                                                                                                                                 |   |   |   |
|----------------------------|-----------------------------------------------------------------------------------------------------------------------------------------------------------------------------------------------------------------------------------------------------------------|---|---|---|
|                            | Screen for contractures and use or need of devices to prevent them (ankle-foot orthoses and splints).                                                                                                                                                           | ✓ |   |   |
|                            | Discuss risk of fractures due to osteopenia.                                                                                                                                                                                                                    | ✓ |   |   |
|                            | Screen for needs and use of mobility aids.                                                                                                                                                                                                                      | ✓ |   |   |
| <b>Urology</b>             | Review toilet training, frequency and infrequency of urination, and urinary tract infections. Refer to urology for frequent urinary tract infections or overflow incontinence.                                                                                  | ✓ |   |   |
| <b>Development</b>         | Documentation of baseline, gains and losses of milestones. Fine motor: hand use: raking grasp, pincer grasp, rake, holding cup or spoon.<br>Gross motor: sitting, standing, and walking.<br>Language: coo, babble, laugh, words.                                | ✓ |   | ✓ |
| <b>Communication</b>       | Screen communication methods used by family and school: eye pointing, vocalizations, switches, ipad, eye-gaze device.                                                                                                                                           | ✓ |   | ✓ |
| <b>Behavioral</b>          | Screen for symptoms of anxiety and depression, such as withdrawal, screaming and irritability. Inquire about sensory processing difficulties.                                                                                                                   | ✓ | ✓ | ✓ |
| <b>Sleep</b>               | Review sleep initiation, staying asleep, snoring or coughing, and frequency of nocturnal interventions by caregivers. Review safety of bed and bedroom.                                                                                                         | ✓ | ✓ | ✓ |
| <b>Pain</b>                | Discuss delayed pain response and describe individual's response to pain.                                                                                                                                                                                       | ✓ |   |   |
| <b>Extremities</b>         | Temperature dysregulation. Review environmental factors that might impact comfort.                                                                                                                                                                              | ✓ |   |   |
| <b>Screenings</b>          | Vision screening including acuity, spatial, depth, visual fields and cortical visual impairment. Review results with parents.                                                                                                                                   | ✓ |   |   |
|                            | Audiology ABR at birth, PRN if chronic otitis media, consider evaluation for auditory processing delay <input type="checkbox"/>                                                                                                                                 | ✓ |   | ✓ |
|                            | Annual dental health screening; refer for cleaning every 6 months.                                                                                                                                                                                              | ✓ |   |   |
| <b>Education/therapies</b> | Review for presence of current IEP (see info on RettSyndrome.org)<br>Documentation of therapies (type and frequency).                                                                                                                                           | ✓ |   | ✓ |
| <b>Family/Social</b>       | Assess for family stress (financial, social, fatigue)                                                                                                                                                                                                           | ✓ | ✓ | ✓ |
| <b>Resources</b>           | Review available community, insurance resources (DMV permit, respite care etc.)<br>In adolescent individuals review plans for obtaining guardianship. PCP may be required to write Letters of Medical Necessity for equipment and sign school medication forms. |   | ✓ |   |

\*6month follow-up visit is medically necessary to screen for issues that can appear quickly, progress rapidly and require intervention

<sup>1</sup>Please see CDC or Nellhaus head circumference chart for age 0-18 years

<sup>2</sup>Please see **Food and Drink Log** (<https://www.rettsyndrome.org/pcg>) to ensure adequate calcium, vitamin D, calories and fluid intake

**LABORATORY EVALUATIONS:** CBC, chemistry panel, 25-OH-vitamin D (yearly), baseline lipid screen (fasting if possible), UA (every 2 years). If disrupted sleep or concern with restless leg syndrome, consider ferritin, serum iron, TIBC, transferrin.

Tables 3-7. Detailed approaches to management and therapy for RTT. References not specific to RTT noted as “See:”.

| <b>Table 3: Genetics, Neurology, Cardiology, Respiratory, and Urology</b> |                                                                       |                                                                                                                                                                                                                                                                                                                                                                                                                                                                                                                                                                                                                                                                                  |                   |
|---------------------------------------------------------------------------|-----------------------------------------------------------------------|----------------------------------------------------------------------------------------------------------------------------------------------------------------------------------------------------------------------------------------------------------------------------------------------------------------------------------------------------------------------------------------------------------------------------------------------------------------------------------------------------------------------------------------------------------------------------------------------------------------------------------------------------------------------------------|-------------------|
| <b>System/Area</b>                                                        | <b>Common concerns and questions</b>                                  | <b>Details and suggested approach</b>                                                                                                                                                                                                                                                                                                                                                                                                                                                                                                                                                                                                                                            | <b>References</b> |
| <b>Genetics</b>                                                           | <i>MECP2</i> gene                                                     | For suspicion of Rett syndrome, <i>MECP2</i> gene sequencing and MLPA testing is recommended. MLPA testing is needed to detect deletions otherwise missed by sequencing; this test is necessary if no abnormalities are found by sequencing. Referral to a geneticist or genetic counselor is recommended to review recurrence risks and answer related questions. Genetic testing results are essential for enrollment in clinical trials. Referral to a Rett Center if feasible may be useful to provide multidisciplinary care and access to clinical trials.                                                                                                                 | 16,70,71          |
| <b>Neurology</b>                                                          | Seizures and Spells                                                   | Refer to neurologist for seizures and spells suspicious for seizures with follow-up every 6 months if treated with an anticonvulsant. It is difficult to differentiate between a non-epileptic Rett Spell and a seizure (both may be present). Individuals can have multiple types of seizures. Seizure logs by the family are needed with careful description of events that includes frequency and duration. Videos of events are helpful to the neurologist. The neurologist may order a video EEG to accurately characterize whether a type of event is a seizure or not. An overnight EEG may be necessary to capture sleep; an EEG is incomplete if sleep is not captured. | 39-42             |
|                                                                           | Abnormal movements                                                    | Ataxic gait and an impaired spatial awareness (proprioception) are common. Stereotypical hand movements (hand-wringing, mouthing, etc) are typical. These are often disruptive to hand use. Use of splints to elbows or hand guards, which may be prescribed by an OT, may be helpful to improve hand use. Initially, most individuals have low tone that progresses over years to high tone and dystonia. Neurologist or physiatrist may prescribe neuromuscular blockade or other medications to reduce tone to maintain function and prevent contractures.                                                                                                                    | 52,53,72,73       |
| <b>Cardiology</b>                                                         | Abnormal ECG                                                          | Yearly ECG to check for prolonged QTc interval which can develop at any time. Referral to cardiologist if the ECG is abnormal, who may consider further studies (Holter monitor, echocardiogram) or treatment. Avoid prescription of medications that can prolong QTc interval (i.e. fluoxetine). A current ECG is needed before anesthesia.                                                                                                                                                                                                                                                                                                                                     | 35-38             |
|                                                                           | Poor circulation                                                      | Distal temperature asymmetries are common and thought to be autonomic in origin; no specific therapy is recommended.                                                                                                                                                                                                                                                                                                                                                                                                                                                                                                                                                             | 46,74,75          |
| <b>Respiratory</b>                                                        | Hyperventilation, air swallowing, breath holding, blowing raspberries | Due to autonomic dysregulation, these may occur during the day. While not purposeful, they may be triggered by anxiety. Currently, there are no medications or treatments for this. If night time apneas are present, check tonsils and consider ordering a comprehensive sleep study and related specialist referral. Breathing abnormalities may disrupt feeding.                                                                                                                                                                                                                                                                                                              | 47,48,76-78       |
| <b>Urology</b>                                                            | Urine retention                                                       | Autonomic dysfunction can lead to delayed bladder emptying and bladder distension. If present, referral to urology may be needed. Constipation can increase risk of UTIs. Toilet training can be achieved in some cases. Certain medications or poor fluid intake can cause increase risk of kidney stones.                                                                                                                                                                                                                                                                                                                                                                      | 54,55 See: 79     |

**Table 4: Gastroenterology and Nutrition**

| <b>System/Area</b>                    | <b>Common concerns and questions</b> | <b>Details and suggested approach</b>                                                                                                                                                                                                                                                                                                                                                                                                                                                                                                                                                                                                      | <b>References</b> |
|---------------------------------------|--------------------------------------|--------------------------------------------------------------------------------------------------------------------------------------------------------------------------------------------------------------------------------------------------------------------------------------------------------------------------------------------------------------------------------------------------------------------------------------------------------------------------------------------------------------------------------------------------------------------------------------------------------------------------------------------|-------------------|
| <b>Gastroenterology and Nutrition</b> | Dysmotility                          | Abdominal pain and discomfort typically are caused by reflux, gas bloating, delayed stomach emptying, biliary tract disease, or constipation; these can be empirically diagnosed and managed (see below). These will present with abdominal fullness (gas or constipation), irritability (reflux or constipation), nocturnal arousals (reflux or constipation), arching (reflux), overt reflux or emesis, burping (reflux or air swallowing). Gall bladder dysfunction, screened by abdominal ultrasound, should be considered. Referral to surgery for cholecystectomy may be necessary for symptomatic gallstones or biliary dyskinesia. | 23,24,26,57       |
|                                       | Constipation                         | <u>This is a very common problem.</u> Laxatives (polyethylene glycol, magnesium hydroxide, glycerin or bisacodyl suppositories) are often a part of long-term treatment with a goal of one soft bowel movement per day.                                                                                                                                                                                                                                                                                                                                                                                                                    | 23,26             |
|                                       | Reflux                               | <u>This is a very common problem.</u> PPI or H2 blockers are used empirically. Referral to gastroenterologist may be necessary to rule out complications such as esophagitis, ulcer, strictures, or Barrett's esophagus.                                                                                                                                                                                                                                                                                                                                                                                                                   | 23,26             |
|                                       | Poor weight gain                     | Fatigue and irritability may be signs that dietary requirements are not being met; consider energy dense foods (oils, syrups, avocado), gastroenterologist, and nutrition consults. Gastrostomy-button may be needed to maintain growth; counsel families that use of a gastrostomy button does not preclude oral feeding as long as oral feeding is safe. Use CDC/WHO growth charts to track growth and try to keep at same BMI percentile on growth curve through adolescent growth spurt. RTT-specific growth charts are also available.                                                                                                | 23-25,80,81       |
|                                       | Calcium/Vitamin D                    | Ensure supplemental Vitamin D intake: 600-1000 IU or more daily. Target serum levels of 25-OH-Vitamin D greater than 30-40 ng/ml.<br>Ensure milk and dairy products to provide age-appropriate dietary calcium intakes: 1-3 y, 700 mg/d; 4-8 y, 1000 mg/d; 9-18 y, 1300 mg/d; 19 y and older, 1000 mg/d. One 8-oz glass of milk or 8-oz cup of yogurt contains 300 mg of calcium.                                                                                                                                                                                                                                                          | 62-64 See: 82     |
|                                       | Prolonged feeding times              | Long feeding times (more than 30 minutes) can affect quality of life for patient and family; this may be an indication that a gastrostomy button is needed.                                                                                                                                                                                                                                                                                                                                                                                                                                                                                | 49,81 See: 83     |
|                                       | Chewing/swallowing difficulties      | Referral to appropriate therapist or gastroenterologist to assess if there is concern for aspiration (coughing, choking, gagging with feeding or aspiration or unexplained pneumonia). In some cases, thickeners for liquids may be helpful to prevent aspiration versus need for a gastrostomy button.                                                                                                                                                                                                                                                                                                                                    | 23,24             |

| <b>Table 5: Orthopedics, Rehabilitation, Skin, Endocrine, and Hospitalization</b> |                                                                |                                                                                                                                                                                                                                                                                                                                                                                                                                                                                                                                                                                                                                                                                                                                                    |                          |
|-----------------------------------------------------------------------------------|----------------------------------------------------------------|----------------------------------------------------------------------------------------------------------------------------------------------------------------------------------------------------------------------------------------------------------------------------------------------------------------------------------------------------------------------------------------------------------------------------------------------------------------------------------------------------------------------------------------------------------------------------------------------------------------------------------------------------------------------------------------------------------------------------------------------------|--------------------------|
| <b>System/Area</b>                                                                | <b>Common concerns and questions</b>                           | <b>Details and suggested approach</b>                                                                                                                                                                                                                                                                                                                                                                                                                                                                                                                                                                                                                                                                                                              | <b>References</b>        |
| <b>Orthopedics, Rehabilitation</b>                                                | Scoliosis                                                      | Increased risk of neuromuscular scoliosis after age 6; risk typically abates after puberty. This can progress rapidly if present, necessitating re-observation every 6 months if present. Supine x-ray and orthopedic referral when scoliotic curvature greater than 20 degrees; correction may be indicated when greater than 40 degrees. Kyphosis is more common in ambulatory individuals.                                                                                                                                                                                                                                                                                                                                                      | 50,84-87                 |
|                                                                                   | Increased risk of hip subluxation                              | Examine hip range of motion due to high risk for hip subluxation and contractures, as either may be source of pain and cause for irritability. X-ray-AP views of pelvis may be needed to evaluate femoral head coverage.                                                                                                                                                                                                                                                                                                                                                                                                                                                                                                                           | 88                       |
|                                                                                   | Contractures                                                   | Encourage families and caregivers to inspect all joints and practice daily range of motion, especially if mobility is reduced in an acute setting (illness or hospitalization). Consider OT and PT consults for bracing and splinting. Consider neurology and physiatry consults for neuromuscular blockade or other medications to improve tone.                                                                                                                                                                                                                                                                                                                                                                                                  | 89,90                    |
|                                                                                   | Osteopenia and fractures                                       | There is higher risk of fracture due to immobility and use of anticonvulsants. If fracture occurs, consider DEXA scan and referral to endocrine specialist (in addition to aggressive screen of calcium, vitamin D intake and 25-OH-vitamin D levels). Cause for fractures beyond osteopenia needs investigation in order to eliminate other preventable causes, such as falling out of bed (needs rails), falling at home (needs assessment of home) or non-accidental trauma.                                                                                                                                                                                                                                                                    | 62-66,80,82,91,92        |
|                                                                                   | Equipment                                                      | There is risks of injury due to outgrown equipment (See Skin above). Family and caregivers may need lifts, shower accommodations, bed-side toilets, etc.; these needs may be best assessed by a physiatry referral.                                                                                                                                                                                                                                                                                                                                                                                                                                                                                                                                | See: <sup>93</sup>       |
| <b>Skin</b>                                                                       | Breakdown from mouthing or equipment or lack of re-positioning | Redness persisting longer than 20 min after equipment (such as a splint) is removed is of concern for development of pressure ulcers; return to PT to re-fit equipment. OT or PT may prescribe splints on elbows or hands to prevent skin breakdown from mouthing. Decubitus ulcer may need consultation with wound specialist and equipment specialist.                                                                                                                                                                                                                                                                                                                                                                                           | 90                       |
| <b>Endocrinology, Gynecology</b>                                                  | Premature adrenarche                                           | Menarche comes later, but breast buds and pubic hair may begin earlier than in typically developing children. Periods may be irregular due to low body weight or stress; T4, TSH should be checked if periods are irregular. Counsel family to notice whether or not seizure frequency corresponds with menstrual cycle and alert neurologist. Consideration of menses suppression should be considered, especially if it disrupts the interactions with caregivers and family or hormonal fluctuations correspond with increased seizure activity. The impact of menses suppression on bone health should be considered; IUD is a consideration. Avoidance of DEPO-provera is a consideration. Well-woman examination should include breast exam. | 51,94 See: <sup>95</sup> |
| <b>Hospitalization</b>                                                            | Anesthesia sensitivity, impaired proprioception                | Individuals may need lower doses of anesthetics or analgesics. They may take longer to awaken from anesthesia. It is important to ensure anesthesiologist is aware of current medications (especially anticonvulsants and cannabis preparations), type and description of seizures, breathing abnormalities and risk of presence of prolonged QTc; a recent EKG is essential. Hospital needs to be aware of impaired proprioception, lack of hand use, inability to change position and increased fall risk. If hospitalized, family or hospital should perform daily ROM to prevent contractures.                                                                                                                                                 | 35-37,43-45,47,48        |

**Table 6: Psychological, Behavioral, Sleep, Pain, and Screenings**

| <b>System/Area</b>               | <b>Common concerns and questions</b>     | <b>Details and suggested approach</b>                                                                                                                                                                                                                                                                                                                                                                                                                                                                      | <b>References</b> |
|----------------------------------|------------------------------------------|------------------------------------------------------------------------------------------------------------------------------------------------------------------------------------------------------------------------------------------------------------------------------------------------------------------------------------------------------------------------------------------------------------------------------------------------------------------------------------------------------------|-------------------|
| <b>Psychological, Behavioral</b> | Issues with inattention/anxiety          | Auditory processing is delayed and may be misinterpreted as disinterest; allow for this delay when assessing non-verbal language by allowing additional time for responses to questions or commands. Behavioral inconsistency is typical and may be affected by physical factors such as sleep or environment. Assess for intolerance of excessive stimuli (i.e. bright lights, loud noises).                                                                                                              | 32,33             |
|                                  | Externalizing/internalizing behaviors    | Screen for caregiver impressions of anxiety and depression, such as withdrawal; these may become more prominent with age or in individuals with milder clinical presentations. Identify possible contributors (e.g., sedating medications, decreased social interaction, limited access to engaging activities). Consider treatment with an SSRI such as escitalopram which may have a lower risk of inducing a prolonged QTc interval.                                                                    | 15,61,67,96       |
| <b>Sleep</b>                     | Disrupted sleep                          | Circadian rhythm is often disrupted; consider melatonin to initiate sleep and trazodone or clonidine to maintain asleep. Patient may be getting out of bed, which could be unsafe; consider a tent-style bed or similar engineering controls to keep child in bed and safe. Consider ferritin, serum iron, TIBC and transferrin levels if there is disrupted sleep or concerns for restless leg syndrome and need for iron replacement. Consider overnight sleep study for snoring or pauses in breathing. | 97,98 See: 99-101 |
| <b>Pain</b>                      | Pain assessment and sensitivity          | Individuals have an atypical pain response, with higher thresholds and variable indications of pain (i.e. grimace, crying, increase in repetitive movements); typical pain scales may be difficult to interpret or apply                                                                                                                                                                                                                                                                                   | 102               |
|                                  | Increased risk of chronic pain           | Often due to GI problems (see above), dental problems, immobility and positioning. Always consider hip subluxation, vertebral compression fractures or other fractures as cause of pain.                                                                                                                                                                                                                                                                                                                   | 23,26,56,57       |
| <b>Screening: Ophthalmology</b>  | Difficult vision assessment              | Since eye gaze is the main way of communicating, assessment by practitioner familiar with special needs individuals is needed. Practitioner familiar with cortical visual impairment and ocular apraxia is needed.                                                                                                                                                                                                                                                                                         | 34,89             |
| <b>Screening: Auditory</b>       | Auditory processing delay                | Hearing is typically normal and assessments are often difficult to obtain but if chronic otitis media is present, these are needed.                                                                                                                                                                                                                                                                                                                                                                        | 31                |
| <b>Screening: Dental</b>         | Teeth grinding, increased risk of caries | Routine cleanings needed and may require anesthesia. Dental work under anesthesia should be done with proper anesthesia support at major medical institutions. Regular dental care is required to avoid tooth extraction; tooth extraction significantly interferes with oral function and is to therefore be avoided if at all possible.                                                                                                                                                                  | 73,103            |

| <b>Table 7: Development, Education, Therapies, Social, and Alternative Medications</b> |                                      |                                                                                                                                                                                                                                                                                                                                                                                                                                                                                                                                                                                                                                                                                                                                                                                                                                                                                                                                                                                                                                                                                                                                                                                                                                                                                                            |                   |
|----------------------------------------------------------------------------------------|--------------------------------------|------------------------------------------------------------------------------------------------------------------------------------------------------------------------------------------------------------------------------------------------------------------------------------------------------------------------------------------------------------------------------------------------------------------------------------------------------------------------------------------------------------------------------------------------------------------------------------------------------------------------------------------------------------------------------------------------------------------------------------------------------------------------------------------------------------------------------------------------------------------------------------------------------------------------------------------------------------------------------------------------------------------------------------------------------------------------------------------------------------------------------------------------------------------------------------------------------------------------------------------------------------------------------------------------------------|-------------------|
| <b>System/Area</b>                                                                     | <b>Common concerns and questions</b> | <b>Details and suggested approach</b>                                                                                                                                                                                                                                                                                                                                                                                                                                                                                                                                                                                                                                                                                                                                                                                                                                                                                                                                                                                                                                                                                                                                                                                                                                                                      | <b>References</b> |
| <b>Development, Education and Therapies</b>                                            | Developmental Milestones             | Developmental regression (reduced hand use and language) typically stops between 2-3 years. Skills can be maintained and possibly regained with vigorous therapies. Therapies to consider: speech therapy (ST), feeding therapy (FT), occupational therapy (OT), augmentative communication therapy (AAC), vision therapy (VT), hippotherapy (horse) and swim/pool therapy.                                                                                                                                                                                                                                                                                                                                                                                                                                                                                                                                                                                                                                                                                                                                                                                                                                                                                                                                | 29,30,34,89,104   |
|                                                                                        | IEP and therapy challenges           | Educators may not have experience with Rett syndrome. Request they focus on communication, mobility, and socialization with attention to apraxia. Educators and therapists need to be informed that the approach to therapy in Rett syndrome is different: it is about maintaining skills as well as recovery. Therapies for Rett syndrome should include occupational, physical, speech, swallow and augmentative communication. Therapy that maximizes physical activities should be life-long, as these will minimize long-term complications and maximize long-term potentials. Educational opportunities that provide intensive physical, occupational and speech therapy, especially those that provide augmentative communication, allow individuals to learn and make the best progress. If CVI is present, then a Teacher of the Visually Impaired (TVI) should be included in the IEP. This is in accordance with Free Appropriate Public Education (FAPE), an educational right of all students in the United States that is guaranteed by the Rehabilitation Act of 1973 and the Individuals with Disabilities Education Act (IDEA). Families should work with schools to develop an IEP that recognizes this; referral to a Rett Specialist may provide additional assistance in this regard. | 29,30             |
|                                                                                        | Non-verbal communication             | Alternative and augmentative communication assessments are needed. While this can be done by some speech therapists, a specific referral may be needed. Since eye gaze is typically the most effective form of communication, special eye gaze devices can give individuals a voice. These referrals should be made as early as possible to coincide with typical language development. Devices should be made available to individuals at both home and school. Home use is to be encouraged as this setting may be the longest after the child graduates from the school system.                                                                                                                                                                                                                                                                                                                                                                                                                                                                                                                                                                                                                                                                                                                         | 29,89             |
| <b>Social Concerns</b>                                                                 | Increased family stress              | Family may need respite care. Sibling reactions and their adjustment should be considered; families could provide education for extended family and friends to understand Rett syndrome through patient advocacy group websites. When appropriate, discussion of Rett genetics with older siblings of child-bearing age should be considered by referral to a genetic counselor.                                                                                                                                                                                                                                                                                                                                                                                                                                                                                                                                                                                                                                                                                                                                                                                                                                                                                                                           | 21,22,105,106     |
| <b>Alternative medications</b>                                                         | Cannabis, St John's wort, etc.       | Families should be encouraged to disclose use of alternative medications (cannabis, oils etc) to all specialists.                                                                                                                                                                                                                                                                                                                                                                                                                                                                                                                                                                                                                                                                                                                                                                                                                                                                                                                                                                                                                                                                                                                                                                                          |                   |



## References

1. Neul JL, Kaufmann WE, Glaze DG, et al. Rett syndrome: revised diagnostic criteria and nomenclature. *AnnNeurol*. 2010;68(6):944-950.
2. Hagberg B. Rett's syndrome: prevalence and impact on progressive severe mental retardation in girls. *Acta Paediatr Scand*. 1985;74(3):405-408.
3. Armstrong DD. Rett syndrome neuropathology review 2000. *Brain Dev*. 2001;23 Suppl 1:S72-76.
4. Guy J, Gan J, Selfridge J, Cobb S, Bird A. Reversal of neurological defects in a mouse model of Rett syndrome. *Science*. 2007;315(5815):1143-1147.
5. Sinnott SE, Hector RD, Gadalla KKE, et al. Improved MECP2 Gene Therapy Extends the Survival of MeCP2-Null Mice without Apparent Toxicity after Intracisternal Delivery. *Mol Ther Methods Clin Dev*. 2017;5:106-115.
6. Neul JL, Fang P, Barrish J, et al. Specific mutations in methyl-CpG-binding protein 2 confer different severity in Rett syndrome. *Neurology*. 2008;70(16):1313-1321.
7. Tillotson R, Bird A. The Molecular Basis of MeCP2 Function in the Brain. *J Mol Biol*. 2019.
8. Archer H, Evans J, Leonard H, et al. Correlation between clinical severity in patients with Rett syndrome with a p.R168X or p.T158M MECP2 mutation, and the direction and degree of skewing of X-chromosome inactivation. *J Med Genet*. 2007;44(2):148-152.
9. Grillo E, Lo RC, Bianciardi L, et al. Revealing the complexity of a monogenic disease: rett syndrome exome sequencing. *PLoSOne*. 2013;8(2):e56599.
10. Artuso R, Papa FT, Grillo E, et al. Investigation of modifier genes within copy number variations in Rett syndrome. *J Hum Genet*. 2011;56(7):508-515.
11. Zeev BB, Bebbington A, Ho G, et al. The common BDNF polymorphism may be a modifier of disease severity in Rett syndrome. *Neurology*. 2009;72(14):1242-1247.
12. Cuddapah VA, Pillai RB, Shekar KV, et al. Methyl-CpG-binding protein 2 (MECP2) mutation type is associated with disease severity in Rett syndrome. *J MedGenet*. 2014;51(3):152-158.
13. Hagberg B, Goutieres F, Hanefeld F, Rett A, Wilson J. Rett syndrome: criteria for inclusion and exclusion. *Brain Dev*. 1985;7(3):372-373.
14. Tarquinio DC, Hou W, Neul JL, et al. The Changing Face of Survival in Rett Syndrome and MECP2-Related Disorders. *Pediatr Neurol*. 2015;53(5):402-411.
15. Halbach N, Smeets E, Steinbusch C, Maaskant M, van WD, Curfs L. Aging in Rett syndrome: a longitudinal study. *ClinGenet*. 2012.
16. Fehr S, Bebbington A, Nassar N, et al. Trends in the diagnosis of Rett syndrome in Australia. *Pediatr Res*. 2011;70(3):313-319.
17. Percy AK, Neul JL, Glaze DG, et al. Rett syndrome diagnostic criteria: lessons from the Natural History Study. *AnnNeurol*. 2010;68(6):951-955.
18. Anderson A, Wong K, Jacoby P, Downs J, Leonard H. Twenty years of surveillance in Rett syndrome: what does this tell us? *Orphanet J Rare Dis*. 2014;9:87.
19. Demarest S, Pestana-Knight EM, Olson HE, et al. Severity Assessment in CDKL5 Deficiency Disorder. *Pediatr Neurol*. 2019;97:38-42.
20. Dahl TH. International classification of functioning, disability and health: an introduction and discussion of its potential impact on rehabilitation services and research. *J Rehabil Med*. 2002;34(5):201-204.
21. Killian JT, Jr., Lane JB, Lee HS, et al. Caretaker Quality of Life in Rett Syndrome: Disorder Features and Psychological Predictors. *Pediatr Neurol*. 2016;58:67-74.
22. Lane JB, Salter AR, Jones NE, et al. Assessment of Caregiver Inventory for Rett Syndrome. *J Autism Dev Disord*. 2017;47(4):1102-1112.



23. Motil KJ, Caeg E, Barrish JO, et al. Gastrointestinal and nutritional problems occur frequently throughout life in girls and women with Rett syndrome. *J Pediatr Gastroenterol Nutr.* 2012;55(3):292-298.
24. Motil KJ, Schultz RJ, Browning K, Trautwein L, Glaze DG. Oropharyngeal dysfunction and gastroesophageal dysmotility are present in girls and women with Rett syndrome. *J Pediatr Gastroenterol Nutr.* 1999;29(1):31-37.
25. Tarquinio DC, Motil KJ, Hou W, et al. Growth failure and outcome in Rett syndrome: specific growth references. *Neurology.* 2012;79(16):1653-1661.
26. Baikie G, Ravikumara M, Downs J, et al. Gastrointestinal dysmotility in Rett syndrome. *J Pediatr Gastroenterol Nutr.* 2014;58(2):237-244.
27. Sheen V, Valencia IM, Torres AR. Atypical features in MECP2 P152R-associated Rett syndrome. *Pediatr Neurol.* 2013;49(2):124-126.
28. Hollander E, Kolevzon A, Coyle JT. *Textbook of autism spectrum disorders.* 1st ed. Washington, DC: American Psychiatric Pub.; 2011.
29. Didden R, Korzilius H, Smeets E, et al. Communication in Individuals with Rett Syndrome: an Assessment of Forms and Functions. *J Dev Phys Disabil.* 2010;22(2):105-118.
30. Downs J, Rodger J, Li C, et al. Environmental enrichment intervention for Rett syndrome: an individually randomised stepped wedge trial. *Orphanet J Rare Dis.* 2018;13(1):3.
31. Pillion JP, Rawool VW, Bibat G, Naidu S. Prevalence of hearing loss in Rett syndrome. *Dev Med Child Neurol.* 2003;45(5):338-343.
32. Lenn NJ, Olsho LW, Turk WR. Auditory processing deficit in a patient with Rett syndrome. *Am J Med Genet Suppl.* 1986;1:153-156.
33. Stauder JE, Smeets EE, van Mil SG, Curfs LG. The development of visual- and auditory processing in Rett syndrome: an ERP study. *Brain Dev.* 2006;28(8):487-494.
34. LeBlanc JJ, DeGregorio G, Centofante E, et al. Visual evoked potentials detect cortical processing deficits in Rett syndrome. *Ann Neurol.* 2015;78(5):775-786.
35. McCauley MD, Wang T, Mike E, et al. Pathogenesis of lethal cardiac arrhythmias in Mecp2 mutant mice: implication for therapy in Rett syndrome. *SciTranslMed.* 2011;3(113):113ra125.
36. Kerr AM, Armstrong DD, Prescott RJ, Doyle D, Kearney DL. Rett syndrome: analysis of deaths in the British survey. *Eur Child Adolesc Psychiatry.* 1997;6 Suppl 1:71-74.
37. Crosson J, Srivastava S, Bibat GM, et al. Evaluation of QTc in Rett syndrome: Correlation with age, severity, and genotype. *Am J Med Genet A.* 2017;173(6):1495-1501.
38. Clark BC, Kopp A, Morey W, Djukic A. Serial follow-up of corrected QT interval in Rett syndrome. *Dev Med Child Neurol.* 2019.
39. Glaze DG, Percy AK, Skinner S, et al. Epilepsy and the natural history of Rett syndrome. *Neurology.* 2010;74(11):909-912.
40. Glaze DG, Schultz RJ, Frost JD. Rett syndrome: characterization of seizures versus non-seizures. *Electroencephalogr Clin Neurophysiol.* 1998;106(1):79-83.
41. Tarquinio DC, Hou W, Berg A, et al. Longitudinal course of epilepsy in Rett syndrome and related disorders. *Brain.* 2017;140(2):306-318.
42. Henriksen MW, Breck H, von Tetzchner S, Paus B, Skjeldal OH, Brodtkorb E. Epilepsy in classic Rett syndrome: Course and characteristics in adult age. *Epilepsy Res.* 2018;145:134-139.
43. Kako H, Martin DP, Cartabuke R, Beebe A, Klamar J, Tobias JD. Perioperative management of a patient with Rett syndrome. *Int J Clin Exp Med.* 2013;6(5):393-403.
44. Tofil NM, Buckmaster MA, Winkler MK, Callans BH, Islam MP, Percy AK. Deep sedation with propofol in patients with Rett syndrome. *J Child Neurol.* 2006;21(3):210-213.
45. Konarzewski WH, Misso S. Rett syndrome and delayed recovery from anaesthesia. *Anaesthesia.* 1994;49(4):357.
46. Hagberg B, Aicardi J, Dias K, Ramos O. A progressive syndrome of autism, dementia, ataxia, and loss of purposeful hand use in girls: Rett's syndrome: report of 35 cases. *Ann Neurol.* 1983;14(4):471-479.

- 1
- 2
- 3
- 4 47. Glaze DG, Frost JD, Jr., Zoghbi HY, Percy AK. Rett's syndrome: characterization of respiratory
- 5 48. Tarquinio DC, Hou W, Neul JL, et al. The course of awake breathing disturbances across the
- 6 49. Motil KJ, Morrissey M, Caeg E, Barrish JO, Glaze DG. Gastrostomy placement improves height
- 7 50. Downs J, Torode I, Wong K, et al. The Natural History of Scoliosis in Females With Rett
- 8 51. Killian JT, Lane JB, Cutter GR, et al. Pubertal development in Rett syndrome deviates from
- 9 52. Humphreys P, Barrowman N. The Incidence and Evolution of Parkinsonian Rigidity in Rett
- 10 53. FitzGerald PM, Jankovic J, Percy AK. Rett syndrome and associated movement disorders. *Mov*
- 11 54. Roth JD, Pariser JJ, Stout TE, Misseri R, Elliott SP. Presentation and Management Patterns of
- 12 55. Ward CS, Huang TW, Herrera JA, et al. Loss of MeCP2 Causes Urological Dysfunction and
- 13 56. Freiling M, Bohm M, Lanator I, et al. Prevalence, clinical investigation, and management of
- 14 57. Motil KJ, Lane JB, Barrish JO, et al. Biliary Tract Disease in Girls and Young Women with Rett
- 15 58. Kirby RS, Lane JB, Childers J, et al. Longevity in Rett syndrome: analysis of the North American
- 16 59. Halbach NS, Smeets EE, Schrandt-Stumpel CT, van Schrojenstein Lantman de Valk HH,
- 17 60. Vignoli A, La Briola F, Peron A, et al. Medical care of adolescents and women with Rett
- 18 61. Cianfaglione R, Clarke A, Kerr M, Hastings RP, Oliver C, Felce D. Ageing in Rett syndrome. *J*
- 19 62. Motil KJ, Schultz RJ, Abrams S, Ellis KJ, Glaze DG. Fractional calcium absorption is increased
- 20 63. Motil KJ, Ellis KJ, Barrish JO, Caeg E, Glaze DG. Bone mineral content and bone mineral
- 21 64. Motil KJ, Barrish JO, Neul JL, Glaze DG. Low bone mineral mass is associated with decreased
- 22 65. Jefferson A, Leonard H, Sifarakas A, et al. Clinical Guidelines for Management of Bone Health
- 23 66. Motil KJ, Barrish JO, Lane J, et al. Vitamin D deficiency is prevalent in girls and women with
- 24 67. Buchanan CB, Stallworth JL, Scott AE, et al. Behavioral profiles in Rett syndrome: Data from the
- 25 68. Lotan M, Merrick J, Kandel I, Morad M. Aging in persons with Rett syndrome: an updated
- 26
- 27
- 28
- 29
- 30
- 31
- 32
- 33
- 34
- 35
- 36
- 37
- 38
- 39
- 40
- 41
- 42
- 43
- 44
- 45
- 46
- 47
- 48
- 49
- 50
- 51
- 52
- 53
- 54
- 55
- 56
- 57
- 58
- 59
- 60

- 1  
2  
3 69. Katz DM, Bird A, Coenraads M, et al. Rett Syndrome: Crossing the Threshold to Clinical  
4 Translation. *Trends Neurosci.* 2016;39(2):100-113.
- 5 70. Erlandson A, Samuelsson L, Hagberg B, Kyllerman M, Vujic M, Wahlstrom J. Multiplex  
6 ligation-dependent probe amplification (MLPA) detects large deletions in the MECP2 gene of  
7 Swedish Rett syndrome patients. *Genet Test.* 2003;7(4):329-332.
- 8 71. Gill H, Cheadle JP, Maynard J, et al. Mutation analysis in the MECP2 gene and genetic  
9 counselling for Rett syndrome. *J Med Genet.* 2003;40(5):380-384.
- 10 72. Temudo T, Ramos E, Dias K, et al. Movement disorders in Rett syndrome: an analysis of 60  
11 patients with detected MECP2 mutation and correlation with mutation type. *Mov Disord.*  
12 2008;23(10):1384-1390.
- 13 73. Temudo T, Oliveira P, Santos M, et al. Stereotypies in Rett syndrome: analysis of 83 patients  
14 with and without detected MECP2 mutations. *Neurology.* 2007;68(15):1183-1187.
- 15 74. Hagberg B. Clinical manifestations and stages of Rett syndrome. *Ment Retard Dev Disabil Res*  
16 *Rev.* 2002;8(2):61-65.
- 17 75. Symons FJ, Byiers B, Hoch J, et al. Infrared Thermal Analysis and Individual Differences in Skin  
18 Temperature Asymmetry in Rett Syndrome. *Pediatr Neurol.* 2015;53(2):169-172.
- 19 76. Kerr AM, Julu PO. Recent insights into hyperventilation from the study of Rett syndrome. *Arch*  
20 *Dis Child.* 1999;80(4):384-387.
- 21 77. Krajnc N. Severe respiratory dysrhythmia in Rett syndrome treated with topiramate. *J Child*  
22 *Neurol.* 2014;29(10):NP118-121.
- 23 78. Gokben S, Ardic UA, Serdaroglu G. Use of buspirone and fluoxetine for breathing problems in  
24 Rett syndrome. *Pediatr Neurol.* 2012;46(3):192-194.
- 25 79. Chu DI, Tasian GE, Copelovitch L. Pediatric Kidney Stones - Avoidance and Treatment. *Curr*  
26 *Treat Options Pediatr.* 2016;2(2):104-111.
- 27 80. Marchand V, Motil KJ, Nutrition NCo. Nutrition support for neurologically impaired children: a  
28 clinical report of the North American Society for Pediatric Gastroenterology, Hepatology, and  
29 Nutrition. *J Pediatr Gastroenterol Nutr.* 2006;43(1):123-135.
- 30 81. Leonard H, Ravikumara M, Baikie G, et al. Assessment and management of nutrition and growth  
31 in Rett syndrome. *J Pediatr Gastroenterol Nutr.* 2013;57(4):451-460.
- 32 82. In: Ross AC, Taylor CL, Yaktine AL, Del Valle HB, eds. *Dietary Reference Intakes for Calcium*  
33 *and Vitamin D.* Washington (DC)2011.
- 34 83. Cook S, Hooper V, Nasser R, Larsen D. Effect of gastrostomy on growth in children with  
35 neurodevelopmental disabilities. *Can J Diet Pract Res.* 2005;66(1):19-24.
- 36 84. Percy AK, Lee HS, Neul JL, et al. Profiling scoliosis in Rett syndrome. *Pediatr Res.*  
37 2010;67(4):435-439.
- 38 85. Killian JT, Lane JB, Lee HS, et al. Scoliosis in Rett Syndrome: Progression, Comorbidities, and  
39 Predictors. *Pediatr Neurol.* 2017;70:20-25.
- 40 86. Downs J, Bergman A, Carter P, et al. Guidelines for management of scoliosis in Rett syndrome  
41 patients based on expert consensus and clinical evidence. *Spine (Phila Pa 1976).*  
42 2009;34(17):E607-E617.
- 43 87. Downs J, Torode I, Wong K, et al. Surgical fusion of early onset severe scoliosis increases  
44 survival in Rett syndrome: a cohort study. *Dev Med Child Neurol.* 2016;58(6):632-638.
- 45 88. Tay G, Graham H, Graham HK, Leonard H, Reddihough D, Baikie G. Hip displacement and  
46 scoliosis in Rett syndrome - screening is required. *Dev Med Child Neurol.* 2010;52(1):93-98.
- 47 89. Cass H, Reilly S, Owen L, et al. Findings from a multidisciplinary clinical case series of females  
48 with Rett syndrome. *Dev Med Child Neurol.* 2003;45(5):325-337.
- 49 90. Hirano D, Taniguchi T. Skin injuries and joint contractures of the upper extremities in Rett  
50 syndrome. *J Intellect Disabil Res.* 2018;62(1):53-59.
- 51 91. Downs J, Bebbington A, Woodhead H, et al. Early determinants of fractures in Rett syndrome.  
52 *Pediatrics.* 2008;121(3):540-546.
- 53  
54  
55  
56  
57  
58  
59  
60

- 1  
2  
3 92. Jefferson AL, Woodhead HJ, Fyfe S, et al. Bone mineral content and density in Rett syndrome  
4 and their contributing factors. *Pediatr Res*. 2011;69(4):293-298.  
5 93. Freundlich K. Pressure Injuries in Medically Complex Children: A Review. *Children (Basel)*.  
6 2017;4(4).  
7 94. Stagi S, Cavalli L, Congiu L, et al. Thyroid function in Rett syndrome. *Horm Res Paediatr*.  
8 2015;83(2):118-125.  
9 95. Tauboll E, Sveberg L, Svalheim S. Interactions between hormones and epilepsy. *Seizure*.  
10 2015;28:3-11.  
11 96. Buchanan CB, Stallworth JL, Scott AE, et al. Behavioral profiles in Rett syndrome: Data from the  
12 natural history study. *Brain Dev*. 2018.  
13 97. Wong K, Leonard H, Jacoby P, Ellaway C, Downs J. The trajectories of sleep disturbances in  
14 Rett syndrome. *J Sleep Res*. 2015;24(2):223-233.  
15 98. Boban S, Leonard H, Wong K, Wilson A, Downs J. Sleep disturbances in Rett syndrome: Impact  
16 and management including use of sleep hygiene practices. *Am J Med Genet A*. 2018;176(7):1569-  
17 1577.  
18 99. Jan JE, Owens JA, Weiss MD, et al. Sleep hygiene for children with neurodevelopmental  
19 disabilities. *Pediatrics*. 2008;122(6):1343-1350.  
20 100. Dye TJ, Jain SV, Simakajornboon N. Outcomes of long-term iron supplementation in pediatric  
21 restless legs syndrome/periodic limb movement disorder (RLS/PLMD). *Sleep Med*. 2017;32:213-  
22 219.  
23 101. Aurora RN, Zak RS, Karipott A, et al. Practice parameters for the respiratory indications for  
24 polysomnography in children. *Sleep*. 2011;34(3):379-388.  
25 102. Downs J, Geranton SM, Bebbington A, et al. Linking MECP2 and pain sensitivity: the example  
26 of Rett syndrome. *Am J Med Genet A*. 2010;152A(5):1197-1205.  
27 103. Lai YYL, Wong K, King NM, Downs J, Leonard H. Oral health experiences of individuals with  
28 Rett syndrome: a retrospective study. *BMC Oral Health*. 2018;18(1):195.  
29 104. Tarquinio DC, Hou W, Neul JL, et al. Age of diagnosis in Rett syndrome: patterns of recognition  
30 among diagnosticians and risk factors for late diagnosis. *Pediatr Neurol*. 2015;52(6):585-591  
31 e582.  
32 105. Lane JB, Lee HS, Smith LW, et al. Clinical severity and quality of life in children and  
33 adolescents with Rett syndrome. *Neurology*. 2011;77(20):1812-1818.  
34 106. Mori Y, Downs J, Wong K, Leonard H. Longitudinal effects of caregiving on parental well-  
35 being: the example of Rett syndrome, a severe neurological disorder. *Eur Child Adolesc*  
36 *Psychiatry*. 2019;28(4):505-520.  
37  
38  
39  
40  
41  
42  
43  
44  
45  
46  
47  
48  
49  
50  
51  
52  
53  
54  
55  
56  
57  
58  
59  
60

1  
2  
3  
4  
5  
6  
7  
8  
9  
10  
11  
12  
13  
14  
15  
16  
17  
18  
19  
20  
21  
22  
23  
24  
25  
26  
27  
28  
29  
30  
31  
32  
33  
34  
35  
36  
37  
38  
39  
40  
41  
42  
43  
44  
45  
46  
47  
48  
49  
50  
51  
52  
53  
54  
55  
56  
57  
58  
59  
60

| <b>Supplementary Table 1. Health supervision goals surrounding individuals with RTT by ICF contextual factors</b> |                                                                                                                                                                                                                                                                                                             |                                                                                                                                                                                                                                                                                                                                                              |                                                                                                                                                                                                                                                                                                                                                                             |                                                                                              |
|-------------------------------------------------------------------------------------------------------------------|-------------------------------------------------------------------------------------------------------------------------------------------------------------------------------------------------------------------------------------------------------------------------------------------------------------|--------------------------------------------------------------------------------------------------------------------------------------------------------------------------------------------------------------------------------------------------------------------------------------------------------------------------------------------------------------|-----------------------------------------------------------------------------------------------------------------------------------------------------------------------------------------------------------------------------------------------------------------------------------------------------------------------------------------------------------------------------|----------------------------------------------------------------------------------------------|
|                                                                                                                   | Early Childhood                                                                                                                                                                                                                                                                                             | Late Childhood                                                                                                                                                                                                                                                                                                                                               | Post-puberty                                                                                                                                                                                                                                                                                                                                                                | Ad                                                                                           |
| Body Functions and Structure                                                                                      | GI/Nutrition: Maintain adequate growth, bone health, and nutrition; manage reflux and constipation<br>Neurological: Identify and manage epilepsy when present; identify and manage autonomic dysfunction<br>Rehabilitation: develop strength and coordination<br>Cardiology: detect and manage prolonged QT | GI/Nutrition: Maintain adequate growth, bone health, and nutrition; manage reflux and constipation<br>Neurological: Identify and manage epilepsy when present; identify and manage autonomic dysfunction<br>Rehabilitation: regulate tone and prevent contractures<br>Cardiology: detect and manage prolonged QT<br>Orthopedics: detect and manage scoliosis | GI/Nutrition: Maintain nutrition and bone health; manage constipation; detect and manage gall bladder dysfunction<br>Neurological: Identify and manage epilepsy when present; identify and manage autonomic dysfunction<br>Rehabilitation: regulate tone and prevent contractures<br>Cardiology: detect and manage prolonged QT<br>Orthopedics detect and prevent fractures | GI<br>nut<br>ma<br>an<br>dys<br>Ne<br>ma<br>pre<br>aut<br>Re<br>an<br>Ca<br>pro<br>Or<br>pre |
| Environment                                                                                                       | Education: Develop appropriate IEP<br>Therapies: Access to appropriate therapies<br>Socialization: Age-appropriate interactions and activities                                                                                                                                                              | Education: Develop appropriate IEP<br>Therapies: Access to appropriate therapies including physical, occupational, and assistive communication technologies<br>Socialization: Age-appropriate interactions and activities                                                                                                                                    | Education: Develop appropriate IEP<br>Therapies: Access to appropriate therapies including physical, occupational, and assistive communication technologies<br>Socialization: Age-appropriate interactions and activities                                                                                                                                                   | Ed<br>Da<br>Th<br>app<br>phy<br>ass<br>tec<br>So<br>app<br>act                               |



# BMJ Paediatrics Open

## Guidance for Health Professionals in Rett Syndrome

|                               |                                                                                                                                                                                                                                                                                                                                                                                                                                                                                                                                                                                                                                                                                                                                                                                                                                                                                                                                                                                                                                                                                                                                                                                                                                                                                                                                                                                                                                                                                                                                                                                                                                                                                                                                                                                                                                                                                                                                                                                                                                                                                                                                                                                                            |
|-------------------------------|------------------------------------------------------------------------------------------------------------------------------------------------------------------------------------------------------------------------------------------------------------------------------------------------------------------------------------------------------------------------------------------------------------------------------------------------------------------------------------------------------------------------------------------------------------------------------------------------------------------------------------------------------------------------------------------------------------------------------------------------------------------------------------------------------------------------------------------------------------------------------------------------------------------------------------------------------------------------------------------------------------------------------------------------------------------------------------------------------------------------------------------------------------------------------------------------------------------------------------------------------------------------------------------------------------------------------------------------------------------------------------------------------------------------------------------------------------------------------------------------------------------------------------------------------------------------------------------------------------------------------------------------------------------------------------------------------------------------------------------------------------------------------------------------------------------------------------------------------------------------------------------------------------------------------------------------------------------------------------------------------------------------------------------------------------------------------------------------------------------------------------------------------------------------------------------------------------|
| Journal:                      | <i>BMJ Paediatrics Open</i>                                                                                                                                                                                                                                                                                                                                                                                                                                                                                                                                                                                                                                                                                                                                                                                                                                                                                                                                                                                                                                                                                                                                                                                                                                                                                                                                                                                                                                                                                                                                                                                                                                                                                                                                                                                                                                                                                                                                                                                                                                                                                                                                                                                |
| Manuscript ID                 | bmjpo-2020-000717.R2                                                                                                                                                                                                                                                                                                                                                                                                                                                                                                                                                                                                                                                                                                                                                                                                                                                                                                                                                                                                                                                                                                                                                                                                                                                                                                                                                                                                                                                                                                                                                                                                                                                                                                                                                                                                                                                                                                                                                                                                                                                                                                                                                                                       |
| Article Type:                 | Original research                                                                                                                                                                                                                                                                                                                                                                                                                                                                                                                                                                                                                                                                                                                                                                                                                                                                                                                                                                                                                                                                                                                                                                                                                                                                                                                                                                                                                                                                                                                                                                                                                                                                                                                                                                                                                                                                                                                                                                                                                                                                                                                                                                                          |
| Date Submitted by the Author: | 02-Jul-2020                                                                                                                                                                                                                                                                                                                                                                                                                                                                                                                                                                                                                                                                                                                                                                                                                                                                                                                                                                                                                                                                                                                                                                                                                                                                                                                                                                                                                                                                                                                                                                                                                                                                                                                                                                                                                                                                                                                                                                                                                                                                                                                                                                                                |
| Complete List of Authors:     | <p>Fu, Cary; Vanderbilt University Medical Center, Pediatrics and Neurology<br/>         Armstrong, Dallas; The Children's Hospital of Philadelphia, Neurology;<br/>         University of Pennsylvania, Neurology<br/>         Marsh, Eric; The Children's Hospital of Philadelphia, Neurology;<br/>         University of Pennsylvania, Neurology<br/>         Lieberman, David; Boston Children's Hospital, Neurology<br/>         Motil, Kay; Baylor College of Medicine, Pediatrics; USDA ARS, Children's<br/>         Nutrition Research Center<br/>         Witt, Rochelle; Boston Children's Hospital, Neurology<br/>         Standridge, Shannon; University of Cincinnati College of Medicine,<br/>         Pediatrics; Cincinnati Children's Hospital Medical Center, Neurology<br/>         Nues, Paige; International Rett Syndrome Foundation<br/>         Lane, Jane; The University of Alabama at Birmingham School of<br/>         Medicine, Civitan International Research Center<br/>         Dinkel, Tristen; Children's Hospital Colorado, Neurology<br/>         Coenraads, Monica; Rett Syndrome Research Trust<br/>         von Hehn, Jana; Rett Syndrome Research Trust<br/>         Jones, Mary; UCSF Benioff Children's Hospital Oakland, Pediatric<br/>         Medicine<br/>         Hale, Katie; UCSF Benioff Children's Hospital Oakland, Pediatric Medicine<br/>         Suter, Bernhard; Baylor College of Medicine, Pediatrics and Neurology;<br/>         Texas Children's Hospital, Neurology<br/>         Glaze, Daniel; Baylor College of Medicine, Pediatrics and Neurology;<br/>         Texas Children's Hospital, Neurology<br/>         Neul, Jeffrey; Vanderbilt Kennedy Center; Vanderbilt University Medical<br/>         Center, Pediatrics, Pharmacology, and Special Education<br/>         Percy, Alan; The University of Alabama at Birmingham School of<br/>         Medicine, Pediatrics, Neurology, Neurobiology, Genetics, and Psychology<br/>         Benke, Timothy; University of Colorado Denver School of Medicine,<br/>         Pediatrics, Pharmacology, Neurology, Otolaryngology; Children's Hospital<br/>         Colorado, Neurology</p> |
| Keywords:                     | Neurology, Genetics, Syndrome, Rehabilitation, Gastroenterology                                                                                                                                                                                                                                                                                                                                                                                                                                                                                                                                                                                                                                                                                                                                                                                                                                                                                                                                                                                                                                                                                                                                                                                                                                                                                                                                                                                                                                                                                                                                                                                                                                                                                                                                                                                                                                                                                                                                                                                                                                                                                                                                            |
|                               |                                                                                                                                                                                                                                                                                                                                                                                                                                                                                                                                                                                                                                                                                                                                                                                                                                                                                                                                                                                                                                                                                                                                                                                                                                                                                                                                                                                                                                                                                                                                                                                                                                                                                                                                                                                                                                                                                                                                                                                                                                                                                                                                                                                                            |

SCHOLARONE™  
Manuscripts

1  
2  
3  
4  
5  
6  
7  
8  
9  
10  
11  
12  
13  
14  
15  
16  
17  
18  
19  
20  
21  
22  
23  
24  
25  
26  
27  
28  
29  
30  
31  
32  
33  
34  
35  
36  
37  
38  
39  
40  
41  
42  
43  
44  
45  
46  
47  
48  
49  
50  
51  
52  
53  
54  
55  
56  
57  
58  
59  
60





I, the Submitting Author has the right to grant and does grant on behalf of all authors of the Work (as defined in the below author licence), an exclusive licence and/or a non-exclusive licence for contributions from authors who are: i) UK Crown employees; ii) where BMJ has agreed a CC-BY licence shall apply, and/or iii) in accordance with the terms applicable for US Federal Government officers or employees acting as part of their official duties; on a worldwide, perpetual, irrevocable, royalty-free basis to BMJ Publishing Group Ltd ("BMJ") its licensees and where the relevant Journal is co-owned by BMJ to the co-owners of the Journal, to publish the Work in this journal and any other BMJ products and to exploit all rights, as set out in our [licence](#).

The Submitting Author accepts and understands that any supply made under these terms is made by BMJ to the Submitting Author unless you are acting as an employee on behalf of your employer or a postgraduate student of an affiliated institution which is paying any applicable article publishing charge ("APC") for Open Access articles. Where the Submitting Author wishes to make the Work available on an Open Access basis (and intends to pay the relevant APC), the terms of reuse of such Open Access shall be governed by a Creative Commons licence – details of these licences and which [Creative Commons](#) licence will apply to this Work are set out in our licence referred to above.

Other than as permitted in any relevant BMJ Author's Self Archiving Policies, I confirm this Work has not been accepted for publication elsewhere, is not being considered for publication elsewhere and does not duplicate material already published. I confirm all authors consent to publication of this Work and authorise the granting of this licence.

## Guidance for Health Professionals in Rett Syndrome

Cary Fu MD<sup>a</sup>, Dallas Armstrong MD<sup>b</sup>, Eric D. Marsh MD PhD<sup>b</sup>, David N. Lieberman MD PhD<sup>c</sup>, Kathleen J. Motil MD PhD<sup>d</sup>, Rochelle Witt MD PhD<sup>c</sup>, Shannon Standridge DO MPH<sup>e</sup>, Paige Nues<sup>f</sup>, Jane Lane RN BSN<sup>g</sup>, Tristen Dinkel CNRN CPN RN BSN<sup>h</sup>, Monica Coenraads<sup>i</sup>, Jana von Hehn PhD<sup>i</sup>, Mary Jones MD MPH<sup>j</sup>, Katie Hale RN MS PNP<sup>j</sup>, Bernhard Suter MD<sup>k</sup>, Daniel G. Glaze MD<sup>k</sup>, Jeffrey L. Neul MD PhD<sup>l</sup>, Alan Percy, MD<sup>g,m</sup>, Tim A. Benke, MD PhD<sup>h,n</sup>

### Affiliations:

<sup>a</sup>Department of Pediatrics and Neurology, Vanderbilt University Medical Center, Nashville, TN;

<sup>b</sup>Division of Neurology, Children's Hospital of Philadelphia and the Department of Neurology, Perelman School of Medicine at the University of Pennsylvania, Philadelphia PA; <sup>c</sup>Department of Neurology,

Boston Children's Hospital; <sup>d</sup>Baylor College of Medicine, Department of Pediatrics, USDA/ARS

Children's Nutrition Research Center, Houston, TX; <sup>e</sup>Department of Pediatrics, University of Cincinnati

College of Medicine, Cincinnati, OH and Division of Neurology, Cincinnati Children's Hospital Medical

Center, Cincinnati, OH; <sup>f</sup>International Rett Syndrome Foundation; <sup>g</sup>University of Alabama at

Birmingham, School of Medicine, Civitan International Research Center, Birmingham, AL; <sup>h</sup>Children's

Hospital Colorado, Department of Neurology, Aurora, CO; <sup>i</sup>Rett Syndrome Research Trust; <sup>j</sup>UCSF

Benioff Children's Hospital Oakland, Department of Pediatric Medicine, Oakland, CA; <sup>k</sup>Baylor College

of Medicine, Departments of Pediatrics and Neurology and Texas Children's Hospital, Houston, TX;

<sup>l</sup>Vanderbilt Kennedy Center, Vanderbilt University Medical Center, Department of Pediatrics,

Pharmacology, and Special Education, Nashville, TN; <sup>m</sup>University of Alabama at Birmingham, School of

Medicine, Department of Pediatrics, Neurology, Neurobiology, Genetics, and Psychology, Birmingham,

AL; <sup>n</sup>University of Colorado School of Medicine, Departments of Pediatrics, Pharmacology, Neurology,

and Otolaryngology, and Children's Hospital Colorado, Department of Neurology, Aurora, CO.

**Corresponding author:** Tim A. Benke, MD PhD

Address: Children's Hospital Colorado, 13123 E 16<sup>th</sup>, Box B155/Neurology, Aurora, CO 80045, USA

Telephone: 303 724 3568

Email: tim.benke@cuanschutz.edu

**Short title:** Health guidance for Rett Syndrome

**Word Count:**

**Abstract: 182/300**

**Introduction: 592**

**Methods: 479**

**Results: 811**

**Discussion: 559**

**Total: 2441/2500**

**Tables: 7**

**Figures: 0**

**References: 120**

**Supplementary Tables: 1**

**Key words:** Rett syndrome, MECP2, primary care guidelines

**Funding Statement:** Cary Fu: International Rett Syndrome Foundation; Dallas Armstrong: Rett Syndrome Research Trust; Eric D. Marsh: NIH U54 HD061222, Rett Syndrome Research Trust; Rochelle M. Witt: Rett Syndrome Research Trust; David N. Lieberman: Rett Syndrome Research Trust, NIH U54 HD061222; Jane Lane: NIH U54 HD061222, Rett Syndrome Research Trust, International Rett Syndrome Foundation; Paige Nues: International Rett Syndrome Foundation; Kathleen J. Motil: International Rett Syndrome Foundation; Bernhard Suter: Blue Bird Circle, NIH U54 HD061222; Daniel G. Glaze: Blue Bird Circle, NIH U54 HD061222; Jeffery L. Neul: NIH U54 HD061222, U54 HD461222, Rett Syndrome Research Trust; Alan K. Percy: NIH U54 HD061222, Rett Syndrome Research Trust; Tim A. Benke: International Rett Syndrome Foundation, Rett Syndrome Research Trust, NIH U54 HD061222, Children's Hospital Colorado Foundation Ponzio Family Chair in Neurology Research.

**Competing Interest Statement:** Eric D. Marsh: Funding from the NIH and International Rett Syndrome Foundation; clinical trials with GW Pharmaceuticals, Zogenix, Marinus; Consultancy to Stoke therapeutics. David N. Lieberman: Consultancy for AveXis, clinical trials with Acadia, Anavex, GW Pharmaceuticals,. Shannon Standridge: Speaker Bureau for GW Pharmaceuticals. Bernhard Suter: Funding from the NIH and Blue Bird Circle; clinical trials with Acadia. Daniel G. Glaze: Funding from the NIH and Blue Bird Circle; clinical trials with GW Pharmaceuticals, Acadia, Anavex, Newron; Consultancy for Acadia and Trend Community Pharmaceuticals. Jeffery L. Neul: Funding from the NIH; Consultancy with Acadia, AveXis, Biohaven, GW Pharmaceuticals, Kurro, Neuren, Newron, Ovid, Takeda, and Teva. Jane Lane: Funding from NIH; Consultancy from International Rett Syndrome Foundation and GW Pharmaceuticals. Alan K. Percy: Funding from the NIH; Consultancy for Anavex, AveXis, Acadia, and GW Pharmaceuticals; Clinical Trials with Anavex, Acadia, GW Pharmaceuticals, and RSRT; Tim A. Benke: Funding from the NIH, International Foundation for CDKL5 Research, and Loulou Foundation. Consultancy for AveXis, Ovid, GW Pharmaceuticals, International Rett Syndrome Foundation, Takeda, and Marinus; Clinical Trials with Acadia, Ovid, GW Pharmaceuticals, Marinus and RSRT; All remuneration has been made to his department. The other authors have indicated they have no financial relationships relevant to this article to disclose.

**Abbreviations:**

ABR: auditory brainstem response

AAC: augmentative and alternative communication

CVI: cortical visual impairment

EI: Early Intervention

ICF: International Classification of Functioning, Disability and Health

IEP: Individualized Education Program (or Plan)

NHS: NIH-funded Natural History Study of Rett and related disorders

PCP: primary care provider

RTT: Rett Syndrome

TVI: teacher of the visually impaired

**Summary Box:**

**What is known:** Rett syndrome (RTT) is a multi-system and rare genetic disorder with similarities to other developmental encephalopathies. There are no peer-reviewed consensus-based therapeutic guidance to care in RTT.

**What this study adds:** Primary care providers and other health professionals caring for patients with RTT frequently have limited first-hand experience managing the disorder due to its rare prevalence. A consensus on guidance for health professionals caring for patients with RTT was developed based on literature review and expert opinion. This guidance is applicable to other rare and often severe neurodevelopmental disorders.

## Abstract

Background: Rett syndrome (RTT) is a severe neurodevelopmental disorder with complex medical co-morbidities extending beyond the nervous system requiring the attention of health professionals. There are no peer-reviewed consensus-based therapeutic guidance to care in RTT. The objective was to provide consensus on guidance of best practice for addressing these concerns.

Methods: Informed by the literature and using a modified Delphi approach, a consensus process was utilized to develop guidance for care in RTT by health professionals.

Results: Typical RTT presents early in childhood in a clinically recognizable fashion. Multisystem co-morbidities evolve throughout the lifespan requiring coordination of care between primary care and often multiple subspecialty providers. To assist health professionals and families in seeking best practice, a checklist and detailed references for guidance were developed by consensus.

Conclusions: The overall multisystem issues of RTT require primary care providers and other health professionals to manage complex medical co-morbidities within the context of the whole individual and family. Given the median life expectancy well into the 6<sup>th</sup> decade, guidance is provided to health professionals to achieve current best possible outcomes for these special-needs individuals.

## Introduction

Rett syndrome (RTT)<sup>1</sup> is a severe neurodevelopmental disorder with an estimated worldwide prevalence of between 1 in 20,000 to 40,000 people. RTT is one of the most common genetic causes of developmental and intellectual impairment in females<sup>2</sup>, affecting up to 1 in 10,000 girls under the age of 12. RTT is not a neurodegenerative condition<sup>3</sup>, rather it is a progressive disorder involving multisystem symptom evolution over time. Following demonstration of symptom reversal in mouse models<sup>4,5</sup>, there is flourishing hope for further disease modifying therapies.

Nearly all individuals with RTT have one of >300 distinct loss-of-function mutations in the *MECP2* gene on the X-chromosome<sup>6</sup>. This gene encodes methyl-CpG binding protein-2, an essential transcriptional regulator in the brain required for normal neurodevelopment<sup>7</sup>. Complete genetic testing involves sequencing and methods to detect larger deletions (e.g. multiplex ligation-dependent probe amplification (MLPA)) of the *MECP2* gene. Likely owing to the random nature of X-chromosome inactivation<sup>8</sup> and other genetic modifiers<sup>9-11</sup>, genotype-phenotype correlations are imprecise. However, a general pattern exists with some mutations (early truncating mutations such as R168X, R255X, R270X, large deletions and specific point mutations such as R106W) associated with increased severity compared to other mutation groups (R133C, R294X, R306X, and C-terminal truncations)<sup>12</sup>. *MECP2* mutations causing RTT are almost always *de novo* (spontaneous) and as such are not expected to recur in families.

The presentation is initially subtle in the first two years of life involving developmental delays and hypotonia on exam, but subsequent symptom evolution between 18-30 months of age with developmental regression and onset of repetitive, purposeless hand movements is striking<sup>13</sup>. The core clinical diagnostic features of RTT (Table 1, Typical and Atypical)<sup>1</sup> include a period of normal (or near normal) development followed by developmental regression with loss of language and hand function skills, impaired gait, and development of hand stereotypies causing life-long dependence<sup>14,15</sup>. The average age at RTT diagnosis of 2.5 years has been trending downward with increasing availability of diagnostic genetic testing<sup>16</sup>. The multisystem nature of the disorder has been documented within multiple observational studies with symptom risk evolving across the lifespan.

1  
2  
3 *MECP2* mutations have been identified rarely in males with neurodevelopmental disorders,  
4  
5 termed “male RTT encephalopathy”. The resulting developmental outcome is quite variable though with  
6  
7 symptomatology distinct from RTT and ranges in severity from a severe neonatal encephalopathy with  
8  
9 minimal developmental improvement to a mild intellectual disability<sup>17</sup>. Male RTT encephalopathy<sup>18</sup> and  
10  
11 other distinct developmental encephalopathies (historically linked to RTT)<sup>19</sup> such as *MECP2* duplication  
12  
13 syndrome<sup>20-22</sup>, *CDKL5* Deficiency Disorder<sup>23-26</sup> and *FOXG1* syndrome<sup>27-30</sup> may have similar approaches  
14  
15 (but distinct therapeutics) as more is learned about specific aspects of their clinical care. Alterations in  
16  
17 *MECP2*, *CDKL5* and *FOXG1* should be considered in all individuals, male and female, with  
18  
19 developmental delays and intellectual disability.  
20  
21

22 In the past two decades the natural history of RTT has been extensively studied<sup>31</sup>. Perhaps most  
23  
24 important to all health professionals managing this complex disorder is the knowledge that with  
25  
26 appropriate care, children with RTT will become adults with RTT; 70% live to at least 50 years of age<sup>14</sup>  
27  
28 <sup>32</sup>. As such, health professionals are often presented with the daunting task of effectively managing the  
29  
30 evolving medical comorbidities of the disorder throughout a patient’s lifespan. To help address this  
31  
32 challenge, based on a review of published literature regarding RTT symptomatology that identified the  
33  
34 most relevant primary care concerns through a modified Delphi consensus approach, we developed  
35  
36 recommendations regarding guidance for best practice. These recommendations have been organized  
37  
38 based on an age-dependent health supervision approach to facilitate the goal of effective and meaningful  
39  
40 care for individuals with RTT across all ages.  
41  
42  
43  
44

## 45 **Methods**

46  
47 Draft guidance was developed (MJ, KH and PN) and presented and discussed at bimonthly  
48  
49 International Rett Syndrome Foundation sponsored North American Rett Syndrome Clinics Network  
50  
51 conference calls between January 2016 through September 2018 with input obtained from 22 clinical  
52  
53 sites. An initial draft was presented January 2017 for external review by the Network through September  
54  
55 2018; additional public input was obtained from January 2019 to May 2019 through placement on the  
56  
57  
58  
59  
60



1  
2  
3 RettSyndrome.org website. With supervision by the group leader, the guidance was further refined  
4 substantially by eight Rett Centers (University of Alabama Birmingham, Vanderbilt University,  
5 Children's Hospital Colorado, Children's Hospital of Philadelphia, Cincinnati Children's Hospital,  
6 Boston Children's Hospital, UCSF Benioff Children's Hospital Oakland, and Texas Children's Hospital)  
7 providing multidisciplinary care for individuals with RTT, in partnership with the NIH-funded Natural  
8 History Study of Rett and related disorders (NHS, U54 HD061222; **ClinicalTrials.gov:**  
9 **NCT00299312/NCT02738281**) and two patient advocacy groups, Rett Syndrome Research Trust and the  
10 International Rett Syndrome Foundation. This consensus approach followed a modified Delphi process  
11 employed by members of this group previously<sup>33</sup>. The partners were chosen based on clinical experience  
12 across primary care, multiple subspecialties, health care delivery, and, importantly, patient-family  
13 experience with RTT. Conflicts of interest were vetted by the group leader with full knowledge by the  
14 group. A consensus led by the group leader surrounding relevant guidance based on published data and  
15 clinical opinion was developed through six further rounds of modifications. The results of a systematic  
16 review were used to inform the guidance (Fu et al, in preparation). The following recommendations were  
17 created based on an age-dependent health supervision approach to assist health professionals in fulfilling  
18 the goal of effective and meaningful care for individuals with RTT across all ages (Tables 2 and 3). Items  
19 are organized by prevalence at each age group. Consistent with International Classification of  
20 Functioning, Disability and Health (ICF) guidelines (WHO, 2001)<sup>34</sup>, this guidance recognizes the inter-  
21 relatedness of body function/structure, environment and personal factors to maximize activities and  
22 participation (Supplemental Table 1). Thus, in addition to routine assessment of medical issues (body  
23 function), several psychosocial, environmental, and educational concerns need to be assessed frequently  
24 to achieve the goal of family-centered service:

- 25 • The financial, emotional and physical impact on the family as a whole: sibling well-being, parent  
26 physical and mental health (sleep, grief, anxiety, depression), quality of life, and marital impacts<sup>35 36</sup>.
- 27 • Vigilance regarding signs and symptoms of abuse and neglect of an at-risk individual.
- 28 • Educational support programs for which the individual may be eligible.

- Government-sponsored income and other support benefits.
- Personal financial, community, and emotional support available to the family.

### Patient involvement

Patients family groups (International Rett Syndrome Foundation and Rett Syndrome Research Trust), represented by parents of individuals with RTT (Ms. Nues and Ms. Coenraads), were involved in the development of the patient care guidance and writing of this manuscript. Their organizations will assist with dissemination of the guidance.

### Results

The guidance was formulated into a checklist (Table 2) with further details and references (Tables 3-7) that informed the checklist and the consensus process. The guidance for management by health professionals was grouped by relevant features and therapeutic approaches at different ages. The checklist (Table 2) is suitable for use by health professionals as well as the family as part of their health care records with Tables 3-7 providing further detailed guidance.

*Diagnosis to 5 years old--Early Childhood:* Most features of RTT may emerge during this age period. Feeding difficulties and growth failure<sup>37-39</sup> begin during this age. Additional treatable gastrointestinal issues including dysmotility, gastroesophageal reflux, constipation, gas bloating, often presenting as irritability or apparent discomfort manifest commonly at this age<sup>37 40</sup>. The development of microcephaly or head growth stagnation (as early as 1.5 months)<sup>39</sup> is a common feature, though macrocephaly has also been seen<sup>41</sup>. Tone issues at this age are typically characterized by hypotonia<sup>42</sup>; early referral to therapists (physical, occupational, speech language including augmentative communication<sup>43</sup>) and establishment of an IEP<sup>44</sup> are necessary. Severe hearing loss is uncommon in RTT<sup>45</sup> but there may be delayed auditory processing<sup>46 47</sup> that mimics hearing impairment. There is increased risk of cortical visual impairment (CVI) and ocular apraxia in RTT<sup>48</sup>. There is evidence suggesting increased risk for prolonged QTc interval that may be present from a young age<sup>49-51</sup> and may develop with time<sup>52</sup>. The frequency of epileptic and non-epileptic spells<sup>53 54</sup> wax and wane throughout the

1  
2  
3 course<sup>53 55</sup>. Individuals with RTT generally respond to anticonvulsants<sup>53 55 56</sup> but there have been no  
4  
5 randomized, controlled trials of specific anticonvulsants for RTT. If hospitalized, it is important to  
6  
7 inform hospital staff of important issues in RTT individuals that could potentially confound or complicate  
8  
9 care. This includes a heightened sensitivity to the effects of anesthetics, potentially requiring lower doses  
10  
11 of anesthetic medications to achieve sedation<sup>57 58</sup> or longer time to awaken from general anesthesia<sup>59</sup>.  
12  
13 Though response to pain is altered in RTT<sup>60</sup>, the approach to analgesia should not be altered. Hospital  
14  
15 staff should also be aware of cold extremities<sup>61</sup>, irregular and disordered breathing with oxygen  
16  
17 desaturations<sup>62 63</sup>, impaired proprioception, lack of hand use, inability to change position, and increased  
18  
19 fall risk.  
20  
21

22 *5 years to the Pre-pubescent Stage--Late Childhood:* During the early school years, children with  
23  
24 RTT typically have stabilized developmentally; the regression phase has ended<sup>39</sup>. Overall, many of the  
25  
26 multisystem issues that arose during the first 5 years of life persist. Preventing undernutrition and  
27  
28 maintaining a healthy BMI is important, as this has been associated with better functioning<sup>38 64</sup>.  
29  
30 Surveillance for scoliosis becomes an important preventive measure; some children (~20%) ultimately  
31  
32 require spinal surgery for this comorbidity<sup>65</sup>. Longitudinal assessment of pubertal development indicates  
33  
34 an increased prevalence of early thelarche and adrenarche but delayed menarche<sup>66</sup>. Difficulties with  
35  
36 abnormal tone in this age range typically are characterized by hypotonia evolving to rigidity<sup>67 68</sup>.  
37  
38

39 *Post-puberty to the end of school (~21 years old)--Post-puberty:* Surveillance for scoliosis  
40  
41 continues to be an important preventive measure though this lessens with completion of puberty<sup>66</sup>.  
42  
43 Surveillance for urinary retention is important<sup>69 70</sup>. Biliary tract disease is seen in young adulthood at  
44  
45 rates similar to the general population but due to communication impairment in RTT the presenting  
46  
47 symptoms may be limited to irritability, weight loss and vomiting<sup>71 72</sup>. Studies of longevity in RTT  
48  
49 demonstrate survival of many into middle age, underscoring the need for the early development of a  
50  
51 comprehensive, thoughtful plan for transitioning to adulthood<sup>73</sup>. Longitudinal supervision is required in  
52  
53 RTT as physical, behavioral and cognitive limitations will not allow for independent living<sup>14 15</sup>. This may  
54  
55 include day programs and respite care.  
56  
57  
58  
59  
60

1  
2  
3  
4  
5  
6  
7  
8  
9  
10  
11  
12  
13  
14  
15  
16  
17  
18  
19  
20  
21  
22  
23  
24  
25  
26  
27  
28  
29  
30  
31  
32  
33  
34  
35  
36  
37  
38  
39  
40  
41  
42  
43  
44  
45  
46  
47  
48  
49  
50  
51  
52  
53  
54  
55  
56  
57  
58  
59  
60

*21 years and older--Adulthood:* Overall, individuals with RTT tend to stabilize clinically in young adulthood<sup>74-76</sup>. Frequent causes of hospitalization for women with RTT include pneumonia, respiratory distress, status epilepticus, rectal bleeding, decline in ambulation, or refusal/inability to eat or drink<sup>15</sup>. While one-third of individuals may have a gastrostomy tube, half of these continue to have some oral intake<sup>32</sup>. With age, concern for low bone mineral mass coupled with long-term use of particular anticonvulsants, raises the risks for osteoporosis and bone fractures<sup>77-79</sup> necessitating continued supplementation and monitoring of 25-OH Vitamin D status<sup>80 81</sup>. Musculoskeletal problems and gross motor function may worsen overall<sup>75</sup> possibly due to more parkinsonian features<sup>67</sup> but with overall preservation of intellect and memory<sup>15</sup>; additional study is needed due to relatively low numbers studied. Physical limitations, parkinsonian features, and high prevalence of social withdrawal behaviors lead to abnormal or decreased social interactions consistent with anxiety or depression<sup>82</sup>. Although the majority of women with RTT in the US live at home<sup>14</sup>, in other countries only about one-third of women over age 16 with RTT live at home (either full or part-time) with the majority living in a residential facility<sup>15</sup>. Long-term and individually-tailored care that provides social interactions and physical activity should be provided at all ages to reduce age-related deterioration<sup>83</sup>.

## Discussion

Management of RTT requires input or expertise related to multiple specialties, often necessitating referrals to many providers in addition to the primary care provider. The above health guidance will evolve with further research into the longitudinal course of RTT by the NHS and others. However, there are limitations to the current proposed health guidance, specifically with respect to the lack of needed randomized clinical trials in a rare condition where interventions, such as physical and other therapies, are rarely standardized. While evaluation of annual ECG for prolonged QT appears supported by the literature<sup>49-52</sup>, the impact and outcomes of such surveillance need further study. At this time, longitudinal prognostic details are not well understood in certain areas of evaluation such as affect, displayed emotion and its meaning, the most appropriate manner to assess intelligence and how it evolves, or the life span of

10

1  
2  
3 gynecologic concerns. Additional studies should also address the role and utility of palliative care and  
4 banking of post-mortem tissue. From this breadth of information, quality metrics with benchmarks can be  
5 defined to ensure standards of care with best outcomes for individuals with RTT.  
6  
7

8  
9 With the relative paucity of older individuals in the NHS and related studies, further study into  
10 the care of older individuals is needed to better address guidance more extensively for both older RTT  
11 women and for those more severely affected who are not routinely captured in most studies<sup>76</sup>.  
12  
13 Additionally, with current and future clinical trials, the disease course for individuals with RTT may be  
14 more modifiable with severity of symptoms and disease progression very different from our current  
15 understanding. There is considerable ongoing research in the field of specific RTT therapeutics<sup>84</sup>. It is  
16 therefore important for families, caregivers and health professionals to reach out to Rett Centers and  
17 family support group resources to stay up to date on clinical trials, drug approvals, and how this impacts  
18 these current care guidance. While a primary care provider may not be able to counsel on the suitability  
19 of different clinical trials, actively engaging RTT individuals and families and referring to clinical trials at  
20 specialty centers is necessary for the development of improved therapeutics.  
21  
22

23  
24 With the advances in healthcare and technology, improved and earlier genetic testing, robust  
25 research in RTT, and active patient advocacy from families and clinicians, individuals with RTT are  
26 surviving well into adulthood while living more healthy and meaningful lives. With the vast amount of  
27 medical knowledge emerging from research in RTT today and knowing the complexity of care RTT often  
28 requires, this proposed guidance can facilitate delivery of more thorough and well-rounded management  
29 and comprehensive surveillance by primary care providers and other health professionals caring for  
30 individuals with RTT. Importantly, the guidance also helps to outline considerations in which health  
31 professionals may want to refer the individual with RTT for more specialized management.  
32  
33

34  
35 In conclusion, Rett syndrome is a medically complex neurodevelopmental disorder impacting  
36 multiple organ systems in an evolving fashion from childhood through the 6<sup>th</sup> decade of adulthood.  
37  
38 Primary care providers and other health professionals tasked with coordinating care play an essential role  
39 in ensuring the long-term health and well-being of these individuals through effective screening practices,  
40  
41  
42  
43  
44  
45  
46  
47  
48  
49  
50  
51  
52  
53  
54  
55  
56  
57  
58  
59  
60

1  
2  
3 active management, and thoughtful coordination of subspecialty requirements. The accumulating  
4  
5 knowledge regarding the natural history of RTT serves as a vital resource to help providers anticipate the  
6  
7 complexities of this disorder.  
8  
9

### 10 11 12 13 **Web-links to regional RTT clinics for health professionals**

14  
15 <https://www.rettsyndrome.org/about-rett-syndrome/clinics>

16  
17 <https://reverserett.org/newly-diagnosed/#clinics-map>

18  
19  
20 <https://www.rettsyndrome.eu/>

### 21 22 23 24 **Useful web-links for families**

25  
26 <https://www.rettsyndrome.org/>

27  
28 <https://reverserett.org/>

29  
30 <https://www.rettsyndrome.org/for-families/resources-for-families>

31  
32 <https://www.rettsyndrome.eu/>

33  
34  
35 **Contribution Statement:** Ms. Nues, Drs. Marsh, Jones, Neul, Percy and Benke conceptualized and  
36 designed the literature search and guidance. Ms. Nues and Dr. Jones initiated a first draft of Tables 2 and  
37 3. Drs. Fu, Armstrong, Lieberman, Marsh and Witt initiated the search and a first draft of the guidance.  
38 All authors participated in the consensus process in developing the guidance as described. Dr. Benke, as  
39 group leader, supervised and moderated the consensus process, initial drafts of the manuscript, the overall  
40 collation of the tables, manuscript, and guidance. All authors approved the final manuscript as submitted  
41 and agree to be accountable for all aspects of the work.  
42  
43

### 44 **Acknowledgements:**

45  
46 We sincerely thank all of the individuals and families that have participated in this research. Thanks to Dr.  
47 Walter Kaufmann for comments on a later stage of this manuscript.  
48  
49  
50  
51  
52  
53  
54  
55  
56  
57  
58  
59  
60

|    |                                                                                               |
|----|-----------------------------------------------------------------------------------------------|
| 1  |                                                                                               |
| 2  |                                                                                               |
| 3  |                                                                                               |
| 4  | Table 1. Classic (or Typical RTT) and Atypical RTT diagnostic criteria <sup>1</sup> .         |
| 5  | <b>Classic or Typical RTT diagnostic criteria</b>                                             |
| 6  | A period of regression followed by recovery or stabilization                                  |
| 7  | 1. Partial or complete loss of acquired purposeful hand skills                                |
| 8  | 2. Partial or complete loss of spoken language                                                |
| 9  | 3. Gait abnormalities: impaired or absence of ability                                         |
| 10 | 4. Stereotypic hand movements such as hand wringing/squeezing, clapping/tapping, mouthing and |
| 11 | washing/rubbing automatisms.                                                                  |
| 12 | <b>Atypical RTT diagnostic criteria</b>                                                       |
| 13 | A period of regression followed by recovery or stabilization                                  |
| 14 | 1. At least 2 of the 4 main criteria                                                          |
| 15 | 2. 5 of 11 supportive criteria                                                                |
| 16 | a) Breathing disturbances while awake                                                         |
| 17 | b) Bruxism while awake                                                                        |
| 18 | c) Impaired sleep                                                                             |
| 19 | d) Abnormal muscle tone                                                                       |
| 20 | e) Peripheral vasomotor disturbances                                                          |
| 21 | f) Scoliosis/kyphosis                                                                         |
| 22 | g) Growth retardation                                                                         |
| 23 | h) Small cold hands and feet                                                                  |
| 24 | i) Inappropriate laughing/screaming spells                                                    |
| 25 | j) Diminished response to pain                                                                |
| 26 | k) Intense eye communication – “eye pointing”                                                 |
| 27 |                                                                                               |
| 28 |                                                                                               |
| 29 |                                                                                               |
| 30 |                                                                                               |
| 31 |                                                                                               |
| 32 |                                                                                               |
| 33 |                                                                                               |
| 34 |                                                                                               |
| 35 |                                                                                               |
| 36 |                                                                                               |
| 37 |                                                                                               |
| 38 |                                                                                               |
| 39 |                                                                                               |
| 40 |                                                                                               |
| 41 |                                                                                               |
| 42 |                                                                                               |
| 43 |                                                                                               |
| 44 |                                                                                               |
| 45 |                                                                                               |
| 46 |                                                                                               |
| 47 |                                                                                               |
| 48 |                                                                                               |
| 49 |                                                                                               |
| 50 |                                                                                               |
| 51 |                                                                                               |
| 52 |                                                                                               |
| 53 |                                                                                               |
| 54 |                                                                                               |
| 55 |                                                                                               |
| 56 |                                                                                               |
| 57 |                                                                                               |
| 58 |                                                                                               |
| 59 |                                                                                               |
| 60 |                                                                                               |



**Table 2.** Health Supervision guidance as a checklist for individuals and PCP.

| <ul style="list-style-type: none"> <li>• <b>Individuals with Rett syndrome should be seen for regular wellness checkups, screenings and immunizations (especially influenza vaccinations)*.</b></li> <li>• <b>Inform staff that extra time will be needed for visit, especially to inspecting the individual without braces, shoes and outer clothing.</b></li> <li>• <b>Parents and care-givers should keep a binder of health records to include: genetic testing results, summaries of all doctor visits (including specialist referrals), summaries of hospital admissions, laboratory studies, ECG, x-ray reports and other imaging results.</b></li> </ul> |                                                                                                                                                                                                                                                                                                                                                                                                                                                                                                                                                                          |                       |                              |          |
|------------------------------------------------------------------------------------------------------------------------------------------------------------------------------------------------------------------------------------------------------------------------------------------------------------------------------------------------------------------------------------------------------------------------------------------------------------------------------------------------------------------------------------------------------------------------------------------------------------------------------------------------------------------|--------------------------------------------------------------------------------------------------------------------------------------------------------------------------------------------------------------------------------------------------------------------------------------------------------------------------------------------------------------------------------------------------------------------------------------------------------------------------------------------------------------------------------------------------------------------------|-----------------------|------------------------------|----------|
| Areas of Assessment                                                                                                                                                                                                                                                                                                                                                                                                                                                                                                                                                                                                                                              | Assessment Details                                                                                                                                                                                                                                                                                                                                                                                                                                                                                                                                                       | Yearly Wellness Visit | Primary Care every 6 months* | Baseline |
| <b>Genetics/<br/>MECP2 Testing Results</b>                                                                                                                                                                                                                                                                                                                                                                                                                                                                                                                                                                                                                       | Counsel family on genetic test results and refer to genetic counselor if appropriate for additional counsel or explanation. Family and PCP to keep a copy of genetic results.                                                                                                                                                                                                                                                                                                                                                                                            |                       |                              | ✓        |
| <b>General</b>                                                                                                                                                                                                                                                                                                                                                                                                                                                                                                                                                                                                                                                   | Update current medications and allergies                                                                                                                                                                                                                                                                                                                                                                                                                                                                                                                                 |                       | At every visit               |          |
|                                                                                                                                                                                                                                                                                                                                                                                                                                                                                                                                                                                                                                                                  | Weight                                                                                                                                                                                                                                                                                                                                                                                                                                                                                                                                                                   |                       | At every visit               |          |
|                                                                                                                                                                                                                                                                                                                                                                                                                                                                                                                                                                                                                                                                  | Height or body length                                                                                                                                                                                                                                                                                                                                                                                                                                                                                                                                                    |                       | At every visit               |          |
|                                                                                                                                                                                                                                                                                                                                                                                                                                                                                                                                                                                                                                                                  | Body mass index                                                                                                                                                                                                                                                                                                                                                                                                                                                                                                                                                          |                       | At every visit               |          |
|                                                                                                                                                                                                                                                                                                                                                                                                                                                                                                                                                                                                                                                                  | Head circumference <sup>1</sup>                                                                                                                                                                                                                                                                                                                                                                                                                                                                                                                                          |                       | At every visit               |          |
|                                                                                                                                                                                                                                                                                                                                                                                                                                                                                                                                                                                                                                                                  | Tanner Stage                                                                                                                                                                                                                                                                                                                                                                                                                                                                                                                                                             |                       | At yearly wellness           |          |
|                                                                                                                                                                                                                                                                                                                                                                                                                                                                                                                                                                                                                                                                  | <b>Laboratory evaluations</b> (see below)                                                                                                                                                                                                                                                                                                                                                                                                                                                                                                                                |                       | (see below)                  |          |
| <b>Gastrointestinal</b>                                                                                                                                                                                                                                                                                                                                                                                                                                                                                                                                                                                                                                          | Review: feeding methods, appetite, chewing ability, choking and length of feeding time.                                                                                                                                                                                                                                                                                                                                                                                                                                                                                  | ✓                     | ✓                            |          |
|                                                                                                                                                                                                                                                                                                                                                                                                                                                                                                                                                                                                                                                                  | Screen for GE reflux, gas bloating, biliary tract disease, constipation and hemorrhoids, skin tags, or fissures.                                                                                                                                                                                                                                                                                                                                                                                                                                                         | ✓                     | ✓                            |          |
| <b>Nutrition</b>                                                                                                                                                                                                                                                                                                                                                                                                                                                                                                                                                                                                                                                 | Review nutritional and herbal supplements<br>Nutrition screening <sup>2</sup> : energy, protein, fluids, sodium, potassium, calcium, and vitamin D intake.<br>Consider nutrition related laboratory screening (yearly): CBC, electrolyte panel, 25-OH-vitamin D, fasting lipids                                                                                                                                                                                                                                                                                          | ✓                     | ✓                            |          |
| <b>Respiratory</b>                                                                                                                                                                                                                                                                                                                                                                                                                                                                                                                                                                                                                                               | Screen for awake disordered breathing (hyperventilating, breath-holding, color change), and air swallowing.                                                                                                                                                                                                                                                                                                                                                                                                                                                              | ✓                     |                              |          |
| <b>Neurology</b>                                                                                                                                                                                                                                                                                                                                                                                                                                                                                                                                                                                                                                                 | Screen for presence of paroxysmal events (seizures or non-epileptic spells suspicious for seizures). Advise caregivers to keep a log with description of distinct event types and frequency. Refer to Neurology if an event occurs repeatedly for diagnostic clarification. Encourage follow-up with neurologist routinely; every 6 months if treated for seizures. If individual's weight fluctuates (more than 10-20%), request neurologist to consider adjusting anticonvulsant doses accordingly. Laboratory follow-up as needed for use of antiseizure medications. | ✓                     | ✓                            | ✓        |
|                                                                                                                                                                                                                                                                                                                                                                                                                                                                                                                                                                                                                                                                  | Screen for abnormal movements (stereotypies and dystonia) and level of impact on daily                                                                                                                                                                                                                                                                                                                                                                                                                                                                                   | ✓                     |                              | ✓        |

|                                       |                                                                                                                                                                                                                                                                                                                       |        |                         |   |
|---------------------------------------|-----------------------------------------------------------------------------------------------------------------------------------------------------------------------------------------------------------------------------------------------------------------------------------------------------------------------|--------|-------------------------|---|
|                                       | activities.                                                                                                                                                                                                                                                                                                           |        |                         |   |
| <b>Cardiology</b>                     | 12-lead ECG to screen for prolonged QTc interval; if abnormal, refer to Cardiology.                                                                                                                                                                                                                                   | ✓      |                         | ✓ |
| <b>Skin</b>                           | Document temperature and color of hands and feet. Screen for skin breakdown from hand-mouthing or ill-fitting braces. Screen for pressure ulcers.                                                                                                                                                                     | ✓      | ✓                       |   |
| <b>Orthopedics<br/>Rehabilitation</b> | Estimate curvature of spine. Recheck every 6 months if scoliosis present; refer to Orthopedics if > 20 degrees.                                                                                                                                                                                                       | ✓      | (if scoliosis present✓) |   |
|                                       | Screen for abnormal hip abduction, range of motion and leg length.                                                                                                                                                                                                                                                    | ✓      | ✓                       |   |
|                                       | Screen for contractures and use or need of devices to prevent them (ankle-foot orthoses and splints).                                                                                                                                                                                                                 | ✓      |                         |   |
|                                       | Discuss risk of fractures due to osteopenia.<br>Screen for needs and use of mobility aids.                                                                                                                                                                                                                            | ✓<br>✓ |                         |   |
| <b>Urology</b>                        | Review toilet training, frequency and infrequency of urination, and urinary tract infections. Refer to Urology for frequent urinary tract infections or urinary retention. Consider Urology related laboratory screening (every 2 years): urinalysis                                                                  | ✓      |                         |   |
| <b>Development</b>                    | Documentation of baseline, gains and losses of milestones. Fine motor: hand use: raking grasp, pincer grasp, rake, holding cup or spoon. Gross motor: sitting, standing, and walking. Language: coo, babble, laugh, words.                                                                                            | ✓      |                         | ✓ |
| <b>Communication</b>                  | Screen communication methods used by family and school: eye pointing, vocalizations, switches, ipad, eye-gaze device.                                                                                                                                                                                                 | ✓      |                         | ✓ |
| <b>Behavioral</b>                     | Screen for symptoms of anxiety and depression, such as withdrawal, screaming and irritability. Inquire about sensory processing difficulties.                                                                                                                                                                         | ✓      | ✓                       | ✓ |
| <b>Sleep</b>                          | Review sleep initiation, staying asleep, snoring or coughing, and frequency of nocturnal interventions by caregivers. Review safety of bed and bedroom. Consider laboratory evaluation for iron deficiency if concerns arise about disrupted sleep or restless leg syndrome: ferritin, serum iron, TIBC, transferrin. | ✓      | ✓                       | ✓ |
| <b>Pain</b>                           | Discuss delayed pain response and describe individual's response to pain.                                                                                                                                                                                                                                             | ✓      |                         |   |
| <b>Extremities</b>                    | Temperature dysregulation. Review environmental factors that might impact comfort.                                                                                                                                                                                                                                    | ✓      |                         |   |
| <b>Screenings</b>                     | Screen for vision concerns and consider referral for formal vision assessment including acuity, spatial, depth, visual fields and cortical visual impairment.                                                                                                                                                         | ✓      |                         |   |
|                                       | Review newborn ABR results at baseline, consider repeating ABR if history of chronic otitis media, consider evaluation for auditory processing delay.                                                                                                                                                                 | ✓      |                         | ✓ |
|                                       | Annual dental health screening; refer for cleaning every 6 months.                                                                                                                                                                                                                                                    | ✓      |                         |   |
| <b>Education/Therapies</b>            | Review for presence of current IEP (see info on RettSyndrome.org)                                                                                                                                                                                                                                                     | ✓      |                         | ✓ |
|                                       | Documentation of therapies (type and frequency).                                                                                                                                                                                                                                                                      | ✓      |                         |   |
| <b>Family/Social</b>                  | Assess for family stress (financial, social, fatigue)                                                                                                                                                                                                                                                                 | ✓      | ✓                       | ✓ |
| <b>Resources</b>                      | Review available community and insurance resources (disabled parking permit, respite care etc.)<br>In adolescent individuals review plans for obtaining guardianship. Clinician may be required                                                                                                                       | ✓      |                         |   |

|  |                                                                                       |  |  |  |
|--|---------------------------------------------------------------------------------------|--|--|--|
|  | to write Letters of Medical Necessity for equipment and sign school medication forms. |  |  |  |
|--|---------------------------------------------------------------------------------------|--|--|--|

\*6month follow-up visit is medically necessary to screen for issues that can appear quickly, progress rapidly and require intervention

<sup>1</sup>Please see CDC or Nellhaus head circumference chart for age 0-18 years

<sup>2</sup>Please see **Food and Drink Log** (<https://www.rettsyndrome.org/pcg>) to ensure adequate calcium, vitamin D, energy and fluid intake

Confidential: For Review Only

**Tables 3-7. Detailed approaches to management and therapy for RTT.** References not specific to RTT noted as “See:”.

| <b>Table 3: Genetics, Neurology, Cardiology, Respiratory, and Urology</b> |                                                                       |                                                                                                                                                                                                                                                                                                                                                                                                                                                                                                                                                                                                                                                                                  |                   |
|---------------------------------------------------------------------------|-----------------------------------------------------------------------|----------------------------------------------------------------------------------------------------------------------------------------------------------------------------------------------------------------------------------------------------------------------------------------------------------------------------------------------------------------------------------------------------------------------------------------------------------------------------------------------------------------------------------------------------------------------------------------------------------------------------------------------------------------------------------|-------------------|
| <b>System/Area</b>                                                        | <b>Common concerns and questions</b>                                  | <b>Details and suggested approach</b>                                                                                                                                                                                                                                                                                                                                                                                                                                                                                                                                                                                                                                            | <b>References</b> |
| <b>Genetics</b>                                                           | <i>MECP2</i> gene                                                     | For suspicion of Rett syndrome, <i>MECP2</i> gene sequencing and MLPA testing is recommended. MLPA testing is needed to detect deletions otherwise missed by sequencing; this test is necessary if no abnormalities are found by sequencing. Referral to a geneticist or genetic counselor is recommended to review recurrence risks and answer related questions. Genetic testing results are essential for enrollment in clinical trials. Referral to a Rett Center if feasible may be useful to provide multidisciplinary care and access to clinical trials.                                                                                                                 | 16 85 86          |
| <b>Neurology</b>                                                          | Seizures and Spells                                                   | Refer to neurologist for seizures and spells suspicious for seizures with follow-up every 6 months if treated with an anticonvulsant. It is difficult to differentiate between a non-epileptic Rett Spell and a seizure (both may be present). Individuals can have multiple types of seizures. Seizure logs by the family are needed with careful description of events that includes frequency and duration. Videos of events are helpful to the neurologist. The neurologist may order a video EEG to accurately characterize whether a type of event is a seizure or not. An overnight EEG may be necessary to capture sleep; an EEG is incomplete if sleep is not captured. | 53-56             |
|                                                                           | Abnormal movements                                                    | Ataxic gait and an impaired spatial awareness (proprioception) are common. Stereotypical hand movements (hand-wringing, mouthing, etc) are typical. These are often disruptive to hand use. Use of splints to elbows or hand guards, which may be prescribed by an OT, may be helpful to improve hand use. Initially, most individuals have low tone that progresses over years to high tone and dystonia. Neurologist or physiatrist may prescribe neuromuscular blockade or other medications to reduce tone to maintain function and prevent contractures.                                                                                                                    | 67 68 87 88       |
| <b>Cardiology</b>                                                         | Abnormal ECG                                                          | Yearly ECG to check for prolonged QTc interval which can develop at any time. Referral to cardiologist if the ECG is abnormal, who may consider further studies (Holter monitor, echocardiogram) or treatment. Avoid prescription of medications that can prolong QTc interval (i.e. fluoxetine). A current ECG is recommended before anesthesia.                                                                                                                                                                                                                                                                                                                                | 49-52             |
|                                                                           | Poor circulation                                                      | Distal temperature asymmetries are common and thought to be autonomic in origin; no specific therapy is recommended.                                                                                                                                                                                                                                                                                                                                                                                                                                                                                                                                                             | 61 89 90          |
| <b>Respiratory</b>                                                        | Hyperventilation, air swallowing, breath holding, blowing raspberries | Due to autonomic dysregulation, these may occur during the day. While not purposeful, they may be triggered by anxiety. Currently, there are no medications or treatments for this. If night time apneas are present, check tonsils and consider ordering a comprehensive sleep study and related specialist referral. Breathing abnormalities may disrupt feeding.                                                                                                                                                                                                                                                                                                              | 62 63 91-93       |
| <b>Urology</b>                                                            | Urine retention                                                       | Autonomic dysfunction can lead to delayed bladder emptying and bladder distension. If present, referral to urology may be needed. Constipation can increase risk of UTIs. Toilet training can be achieved in some cases. Certain medications or poor fluid intake can cause increase risk of kidney stones.                                                                                                                                                                                                                                                                                                                                                                      | 69 70 See: 94     |

**Table 4: Gastroenterology and Nutrition**

| <b>System/Area</b>                    | <b>Common concerns and questions</b> | <b>Details and suggested approach</b>                                                                                                                                                                                                                                                                                                                                                                                                                                                                                                                                                                                                      | <b>References</b> |
|---------------------------------------|--------------------------------------|--------------------------------------------------------------------------------------------------------------------------------------------------------------------------------------------------------------------------------------------------------------------------------------------------------------------------------------------------------------------------------------------------------------------------------------------------------------------------------------------------------------------------------------------------------------------------------------------------------------------------------------------|-------------------|
| <b>Gastroenterology and Nutrition</b> | Dysmotility                          | Abdominal pain and discomfort typically are caused by reflux, gas bloating, delayed stomach emptying, biliary tract disease, or constipation; these can be empirically diagnosed and managed (see below). These will present with abdominal fullness (gas or constipation), irritability (reflux or constipation), nocturnal arousals (reflux or constipation), arching (reflux), overt reflux or emesis, burping (reflux or air swallowing). Gall bladder dysfunction, screened by abdominal ultrasound, should be considered. Referral to surgery for cholecystectomy may be necessary for symptomatic gallstones or biliary dyskinesia. | 37 38 40 72       |
|                                       | Constipation                         | <u>This is a very common problem.</u> Laxatives (polyethylene glycol, magnesium hydroxide, glycerin or bisacodyl suppositories) are often a part of long-term treatment with a goal of one soft bowel movement per day.                                                                                                                                                                                                                                                                                                                                                                                                                    | 37 40             |
|                                       | Reflux                               | <u>This is a very common problem.</u> PPI or H2 blockers are used empirically. Referral to gastroenterologist may be necessary to rule out complications such as esophagitis, ulcer, strictures, or Barrett's esophagus.                                                                                                                                                                                                                                                                                                                                                                                                                   | 37 40             |
|                                       | Poor weight gain                     | Fatigue and irritability may be signs that dietary requirements are not being met; consider energy dense foods (oils, syrups, avocado), gastroenterologist, and nutrition consults. Gastrostomy-button may be needed to maintain growth; counsel families that use of a gastrostomy button does not preclude oral feeding as long as oral feeding is safe. Use CDC/WHO growth charts to track growth and try to keep at same BMI percentile on growth curve through adolescent growth spurt. RTT-specific growth charts are also available.                                                                                                | 37-39 95 96       |
|                                       | Calcium/Vitamin D                    | Ensure supplemental Vitamin D intake: 600-1000 IU or more daily. Target serum levels of 25-OH-Vitamin D greater than 30-40 ng/ml. Ensure milk and dairy products to provide age-appropriate dietary calcium intakes: 1-3 y, 700 mg/d; 4-8 y, 1000 mg/d; 9-18 y, 1300 mg/d; 19 y and older, 1000 mg/d. 240 ml (8 oz) of milk or 240 ml (8 oz) of yogurt contains 300 mg of calcium.                                                                                                                                                                                                                                                         | 77-79 See: 97     |
|                                       | Prolonged feeding times              | Long feeding times (more than 30 minutes) can affect quality of life for patient and family; this may be an indication that a gastrostomy button is needed.                                                                                                                                                                                                                                                                                                                                                                                                                                                                                | 64 96 See: 98     |
|                                       | Chewing/swallowing difficulties      | Referral to appropriate therapist or gastroenterologist to assess if there is concern for aspiration (coughing, choking, gagging with feeding or aspiration or unexplained pneumonia). In some cases, thickeners for liquids may be helpful to prevent aspiration versus need for a gastrostomy button.                                                                                                                                                                                                                                                                                                                                    | 37 38             |

**Table 5: Orthopedics, Rehabilitation, Skin, Endocrine, and Hospitalization**

| <u>System/Area</u>                 | <u>Common concerns and questions</u>                           | <u>Details and suggested approach</u>                                                                                                                                                                                                                                                                                                                                                                                                                                                                                                                                                                                                                                                                                                              | <u>References</u>   |
|------------------------------------|----------------------------------------------------------------|----------------------------------------------------------------------------------------------------------------------------------------------------------------------------------------------------------------------------------------------------------------------------------------------------------------------------------------------------------------------------------------------------------------------------------------------------------------------------------------------------------------------------------------------------------------------------------------------------------------------------------------------------------------------------------------------------------------------------------------------------|---------------------|
| <b>Orthopedics, Rehabilitation</b> | Scoliosis                                                      | Increased risk of neuromuscular scoliosis after age 6; risk typically abates after puberty. This can progress rapidly if present, necessitating re-observation every 6 months if present. Supine x-ray and orthopedic referral when scoliotic curvature greater than 20 degrees; correction may be indicated when greater than 40 degrees. Kyphosis is more common in ambulatory individuals.                                                                                                                                                                                                                                                                                                                                                      | 65 99-102           |
|                                    | Increased risk of hip subluxation                              | Examine hip range of motion due to high risk for hip subluxation and contractures, as either may be source of pain and cause for irritability. X-ray-AP views of pelvis may be needed to evaluate femoral head coverage.                                                                                                                                                                                                                                                                                                                                                                                                                                                                                                                           | 103                 |
|                                    | Contractures                                                   | Encourage families and caregivers to inspect all joints and practice daily range of motion, especially if mobility is reduced in an acute setting (illness or hospitalization). Consider OT and PT consults for bracing and splinting. Consider neurology and physiatry consults for neuromuscular blockade or other medications to improve tone.                                                                                                                                                                                                                                                                                                                                                                                                  | 104 105             |
|                                    | Osteopenia and fractures                                       | There is higher risk of fracture due to immobility and use of anticonvulsants. If fracture occurs, consider DEXA scan and referral to endocrine specialist (in addition to aggressive screen of calcium, vitamin D intake and 25-OH-vitamin D levels). Cause for fractures beyond osteopenia needs investigation in order to eliminate other preventable causes, such as falling out of bed (needs rails), falling at home (needs assessment of home) or non-accidental trauma.                                                                                                                                                                                                                                                                    | 77-81 95 97 106 107 |
|                                    | Equipment                                                      | There is risks of injury due to outgrown equipment (See Skin above). Family and caregivers may need lifts, shower accommodations, bed-side toilets, etc.; these needs may be best assessed by a physiatry referral.                                                                                                                                                                                                                                                                                                                                                                                                                                                                                                                                | See: 108            |
| <b>Skin</b>                        | Breakdown from mouthing or equipment or lack of re-positioning | Redness persisting longer than 20 min after equipment (such as a splint) is removed is of concern for development of pressure ulcers; return to PT to re-fit equipment. OT or PT may prescribe splints on elbows or hands to prevent skin breakdown from mouthing. Decubitus ulcer may need consultation with wound specialist and equipment specialist.                                                                                                                                                                                                                                                                                                                                                                                           | 105                 |
| <b>Endocrinology, Gynecology</b>   | Premature adrenarche                                           | Menarche comes later, but breast buds and pubic hair may begin earlier than in typically developing children. Periods may be irregular due to low body weight or stress; T4, TSH should be checked if periods are irregular. Counsel family to notice whether or not seizure frequency corresponds with menstrual cycle and alert neurologist. Consideration of menses suppression should be considered, especially if it disrupts the interactions with caregivers and family or hormonal fluctuations correspond with increased seizure activity. The impact of menses suppression on bone health should be considered; IUD is a consideration. Avoidance of DEPO-provera is a consideration. Well-woman examination should include breast exam. | 66 109 See: 110     |
| <b>Hospitalization</b>             | Anesthesia sensitivity, impaired proprioception                | Individuals may be more sensitive to effects of anesthetics. They may take longer to awaken from anesthesia. It is important to ensure anesthesiologist is aware of current medications (especially anticonvulsants and cannabis preparations), type and description of seizures, breathing abnormalities and risk of presence of prolonged QTc; a recent ECG is essential. Hospital needs to be aware of impaired proprioception, lack of hand use, inability to change position and increased fall risk. If hospitalized, family or hospital should perform daily ROM to prevent contractures.                                                                                                                                                   | 49-51 57-59 62 63   |

**Table 6: Psychological, Behavioral, Sleep, Pain, and Screenings**

| <b>System/Area</b>               | <b>Common concerns and questions</b>     | <b>Details and suggested approach</b>                                                                                                                                                                                                                                                                                                                                                                                                                                                                      | <b>References</b>    |
|----------------------------------|------------------------------------------|------------------------------------------------------------------------------------------------------------------------------------------------------------------------------------------------------------------------------------------------------------------------------------------------------------------------------------------------------------------------------------------------------------------------------------------------------------------------------------------------------------|----------------------|
| <b>Psychological, Behavioral</b> | Issues with inattention/anxiety          | Auditory processing is delayed and may be misinterpreted as disinterest; allow for this delay when assessing non-verbal language by allowing additional time for responses to questions or commands. Behavioral inconsistency is typical and may be affected by physical factors such as sleep or environment. Assess for intolerance of excessive stimuli (i.e. bright lights, loud noises).                                                                                                              | 46 47                |
|                                  | Externalizing/internalizing behaviors    | Screen for caregiver impressions of anxiety and depression, such as withdrawal; these may become more prominent with age or in individuals with milder clinical presentations. Identify possible contributors (e.g., sedating medications, decreased social interaction, limited access to engaging activities). Consider treatment with an SSRI such as escitalopram which may have a lower risk of inducing a prolonged QTc interval.                                                                    | 15 76 82 111         |
| <b>Sleep</b>                     | Disrupted sleep                          | Circadian rhythm is often disrupted; consider melatonin to initiate sleep and trazodone or clonidine to maintain asleep. Patient may be getting out of bed, which could be unsafe; consider a tent-style bed or similar engineering controls to keep child in bed and safe. Consider ferritin, serum iron, TIBC and transferrin levels if there is disrupted sleep or concerns for restless leg syndrome and need for iron replacement. Consider overnight sleep study for snoring or pauses in breathing. | 112 113 See: 114-116 |
| <b>Pain</b>                      | Pain assessment and sensitivity          | Individuals have an atypical pain response giving appearance of decreased sensitivity and have variable indications of pain (i.e. grimace, crying, increase in repetitive movements); typical pain scales may be difficult to interpret or apply.                                                                                                                                                                                                                                                          | 60                   |
|                                  | Increased risk of chronic pain           | Often due to GI problems (see above), dental problems, immobility and positioning. Always consider hip subluxation, vertebral compression fractures or other fractures as cause of pain.                                                                                                                                                                                                                                                                                                                   | 37 40 71 72          |
| <b>Screening: Ophthalmology</b>  | Difficult vision assessment              | Since eye gaze is the main way of communicating, assessment by a practitioner familiar with special needs individuals and cortical visual impairment is needed. Practitioner familiar with cortical visual impairment and ocular apraxia is needed.                                                                                                                                                                                                                                                        | 48 104               |
| <b>Screening: Auditory</b>       | Auditory processing delay                | Hearing is typically normal and assessments are often difficult to obtain but if chronic otitis media is present, these are needed.                                                                                                                                                                                                                                                                                                                                                                        | 45                   |
| <b>Screening: Dental</b>         | Teeth grinding, increased risk of caries | Routine cleanings needed and may require anesthesia. Dental work under anesthesia should be done with proper anesthesia support at major medical institutions. Regular dental care is required to avoid tooth extraction; tooth extraction significantly interferes with oral function and is to therefore be avoided if at all possible.                                                                                                                                                                  | 88 117               |



| <b>Table 7: Development, Education, Therapies, Social, and Alternative Medications</b> |                                      |                                                                                                                                                                                                                                                                                                                                                                                                                                                                                                                                                                                                                                                                                                                                                                                                                                                                                                                                                                                                                                                                                                                                                                                                                                                                                                                                                                                                                                                                                                                 |                   |
|----------------------------------------------------------------------------------------|--------------------------------------|-----------------------------------------------------------------------------------------------------------------------------------------------------------------------------------------------------------------------------------------------------------------------------------------------------------------------------------------------------------------------------------------------------------------------------------------------------------------------------------------------------------------------------------------------------------------------------------------------------------------------------------------------------------------------------------------------------------------------------------------------------------------------------------------------------------------------------------------------------------------------------------------------------------------------------------------------------------------------------------------------------------------------------------------------------------------------------------------------------------------------------------------------------------------------------------------------------------------------------------------------------------------------------------------------------------------------------------------------------------------------------------------------------------------------------------------------------------------------------------------------------------------|-------------------|
| <b>System/Area</b>                                                                     | <b>Common concerns and questions</b> | <b>Details and suggested approach</b>                                                                                                                                                                                                                                                                                                                                                                                                                                                                                                                                                                                                                                                                                                                                                                                                                                                                                                                                                                                                                                                                                                                                                                                                                                                                                                                                                                                                                                                                           | <b>References</b> |
| <b>Development, Education and Therapies</b>                                            | Developmental Milestones             | Developmental regression (reduced hand use and language) typically stops between 2-3 years. Skills can be maintained and possibly regained with vigorous therapies. Therapies to consider: speech therapy (ST), feeding therapy (FT), occupational therapy (OT), augmentative communication therapy (AAC), vision therapy (VT), hippotherapy (horse) and swim/pool therapy.                                                                                                                                                                                                                                                                                                                                                                                                                                                                                                                                                                                                                                                                                                                                                                                                                                                                                                                                                                                                                                                                                                                                     | 43 44 48 104 118  |
|                                                                                        | IEP and therapy challenges           | Educators may not have experience with Rett syndrome. Request they focus on communication, mobility, and socialization with attention to apraxia. Educators and therapists need to be informed that the approach to therapy in Rett syndrome is different: it is about maintaining skills as well as recovery. Therapies for Rett syndrome should include occupational, physical, speech, swallow and augmentative communication. Therapy that maximizes physical activities should be life-long, as these will minimize long-term complications and maximize long-term potentials. Educational opportunities that provide intensive physical, occupational and speech therapy, especially those that provide augmentative communication, allow individuals to learn and make the best progress. If CVI is present, then a Teacher of the Visually Impaired (TVI) should be included in the IEP. These essential accommodations to facilitate education are in accordance with disability rights legislation enacted in many countries throughout the world as required by the United Nations Convention on the Rights of Persons with Disabilities (CRPD). This international treaty signed by nearly all 193 U.N. Member States defines access to an inclusive, quality and free education as a basic human right of individuals with disabilities. Families should work with schools to develop an IEP that recognizes this; referral to a Rett Specialist may provide additional assistance in this regard. | 43 44             |
|                                                                                        | Non-verbal communication             | Alternative and augmentative communication assessments are needed. While this can be done by some speech therapists, a specific referral may be needed. Since eye gaze is typically the most effective form of communication, special eye gaze devices can give individuals a voice. These referrals should be made as early as possible to coincide with typical language development. Devices should be made available to individuals at both home and school. Home use is to be encouraged as this setting may be the longest after the child graduates from the school system.                                                                                                                                                                                                                                                                                                                                                                                                                                                                                                                                                                                                                                                                                                                                                                                                                                                                                                                              | 43 104            |
| <b>Social Concerns</b>                                                                 | Increased family stress              | Family may need respite care. Sibling reactions and their adjustment should be considered; families could provide education for extended family and friends to understand Rett syndrome through patient advocacy group websites. When appropriate, discussion of Rett genetics with older siblings of child-bearing age should be considered by referral to a genetic counselor.                                                                                                                                                                                                                                                                                                                                                                                                                                                                                                                                                                                                                                                                                                                                                                                                                                                                                                                                                                                                                                                                                                                                | 35 36 119 120     |
| <b>Alternative medications</b>                                                         | Cannabis, St John's wort, etc.       | Families should be encouraged to disclose use of alternative medications (cannabis, oils etc) to all specialists.                                                                                                                                                                                                                                                                                                                                                                                                                                                                                                                                                                                                                                                                                                                                                                                                                                                                                                                                                                                                                                                                                                                                                                                                                                                                                                                                                                                               |                   |

## References

1. Neul JL, Kaufmann WE, Glaze DG, et al. Rett syndrome: revised diagnostic criteria and nomenclature. *Ann Neurol* 2010;68(6):944-50.
2. Hagberg B. Rett's syndrome: prevalence and impact on progressive severe mental retardation in girls. *Acta Paediatr Scand* 1985;74(3):405-8.
3. Armstrong DD. Rett syndrome neuropathology review 2000. *Brain Dev* 2001;23 Suppl 1:S72-6.
4. Guy J, Gan J, Selfridge J, et al. Reversal of neurological defects in a mouse model of Rett syndrome. *Science* 2007;315(5815):1143-7. doi: 10.1126/science.1138389
5. Sinnott SE, Hector RD, Gadalla KKE, et al. Improved MECP2 Gene Therapy Extends the Survival of MeCP2-Null Mice without Apparent Toxicity after Intracisternal Delivery. *Mol Ther Methods Clin Dev* 2017;5:106-15. doi: 10.1016/j.omtm.2017.04.006
6. Neul JL, Fang P, Barrish J, et al. Specific mutations in methyl-CpG-binding protein 2 confer different severity in Rett syndrome. *Neurology* 2008;70(16):1313-21.
7. Tillotson R, Bird A. The Molecular Basis of MeCP2 Function in the Brain. *J Mol Biol* 2019 doi: 10.1016/j.jmb.2019.10.004 [published Online First: 2019/10/21]
8. Archer H, Evans J, Leonard H, et al. Correlation between clinical severity in patients with Rett syndrome with a p.R168X or p.T158M MECP2 mutation, and the direction and degree of skewing of X-chromosome inactivation. *J Med Genet* 2007;44(2):148-52. doi: 10.1136/jmg.2006.045260
9. Grillo E, Lo RC, Bianciardi L, et al. Revealing the complexity of a monogenic disease: rett syndrome exome sequencing. *PLoS One* 2013;8(2):e56599.
10. Artuso R, Papa FT, Grillo E, et al. Investigation of modifier genes within copy number variations in Rett syndrome. *J Hum Genet* 2011;56(7):508-15. doi: 10.1038/jhg.2011.50
11. Zeev BB, Bebbington A, Ho G, et al. The common BDNF polymorphism may be a modifier of disease severity in Rett syndrome. *Neurology* 2009;72(14):1242-7. doi: 10.1212/01.wnl.0000345664.72220.6a
12. Cuddapah VA, Pillai RB, Shekar KV, et al. Methyl-CpG-binding protein 2 (MECP2) mutation type is associated with disease severity in Rett syndrome. *J Med Genet* 2014;51(3):152-58.
13. Hagberg B, Goutieres F, Hanefeld F, et al. Rett syndrome: criteria for inclusion and exclusion. *Brain Dev* 1985;7(3):372-3. doi: 10.1016/s0387-7604(85)80048-6
14. Tarquinio DC, Hou W, Neul JL, et al. The Changing Face of Survival in Rett Syndrome and MECP2-Related Disorders. *Pediatr Neurol* 2015;53(5):402-11. doi: 10.1016/j.pediatrneurol.2015.06.003
15. Halbach N, Smeets E, Steinbusch C, et al. Aging in Rett syndrome: a longitudinal study. *Clin Genet* 2012
16. Fehr S, Bebbington A, Nassar N, et al. Trends in the diagnosis of Rett syndrome in Australia. *Pediatr Res* 2011;70(3):313-9. doi: 10.1203/PDR.0b013e3182242461
17. Villard L. MECP2 mutations in males. *J Med Genet* 2007;44(7):417-23. doi: 10.1136/jmg.2007.049452
18. Neul JL, Benke TA, Marsh ED, et al. The array of clinical phenotypes of males with mutations in Methyl-CpG binding protein 2. *Am J Med Genet B Neuropsychiatr Genet* 2019;180(1):55-67. doi: 10.1002/ajmg.b.32707
19. Paciorkowski AR, Seltzer LE, Neul JL. Developmental Encephalopathies. In: Swaiman KF, Ashwal S, Ferriero DM, et al., eds. Swaiman's Pediatric Neurology. 6 ed. Philadelphia: Mosby 2018:242-48.
20. Ramocki MB, Tavyev YJ, Peters SU. The MECP2 duplication syndrome. *Am J Med Genet A* 2010;152A(5):1079-88. doi: 10.1002/ajmg.a.33184 [doi] [published Online First: 2010/04/29]
21. Miguet M, Faivre L, Amiel J, et al. Further delineation of the MECP2 duplication syndrome phenotype in 59 French male patients, with a particular focus on morphological and neurological

- features. *J Med Genet* 2018;55(6):359-71. doi: 10.1136/jmedgenet-2017-104956 [published Online First: 2018/04/06]
22. Peters SU, Fu C, Suter B, et al. Characterizing the Phenotypic Effect of Xq28 Duplication Size in MECP2 Duplication Syndrome. *Clin Genet* 2019 doi: 10.1111/cge.13521
23. Bahi-Buisson N, Villeneuve N, Caietta E, et al. Recurrent mutations in the CDKL5 gene: genotype-phenotype relationships. *AmJ MedGenetA* 2012;158A(7):1612-19.
24. Mangatt M, Wong K, Anderson B, et al. Prevalence and onset of comorbidities in the CDKL5 disorder differ from Rett syndrome. *Orphanet J Rare Dis* 2016;11:39. doi: 10.1186/s13023-016-0418-y
25. Mori Y, Downs J, Wong K, et al. Impacts of caring for a child with the CDKL5 disorder on parental wellbeing and family quality of life. *Orphanet J Rare Dis* 2017;12(1):16. doi: 10.1186/s13023-016-0563-3
26. Olson HE, Demarest ST, Pestana-Knight EM, et al. Cyclin-Dependent Kinase-Like 5 Deficiency Disorder: Clinical Review. *Pediatr Neurol* 2019 doi: 10.1016/j.pediatrneurol.2019.02.015
27. Florian C, Bahi-Buisson N, Bienvenu T. FOXP1-Related Disorders: From Clinical Description to Molecular Genetics. *MolSyndromol* 2012;2(3-5):153-63.
28. Ma M, Adams HR, Seltzer LE, et al. Phenotype Differentiation of FOXP1 and MECP2 Disorders: A New Method for Characterization of Developmental Encephalopathies. *J Pediatr* 2016;178:233-40 e10. doi: 10.1016/j.jpeds.2016.08.032
29. Vegas N, Cavallin M, Maillard C, et al. Delineating FOXP1 syndrome: From congenital microcephaly to hyperkinetic encephalopathy. *Neurol Genet* 2018;4(6):e281. doi: 10.1212/NXG.0000000000000281
30. Mitter D, Pringsheim M, Kaulisch M, et al. FOXP1 syndrome: genotype-phenotype association in 83 patients with FOXP1 variants. *Genet Med* 2018;20(1):98-108. doi: 10.1038/gim.2017.75
31. Percy AK, Neul JL, Glaze DG, et al. Rett syndrome diagnostic criteria: lessons from the Natural History Study. *AnnNeurol* 2010;68(6):951-55.
32. Anderson A, Wong K, Jacoby P, et al. Twenty years of surveillance in Rett syndrome: what does this tell us? *Orphanet J Rare Dis* 2014;9:87. doi: 10.1186/1750-1172-9-87
33. Demarest S, Pestana-Knight EM, Olson HE, et al. Severity Assessment in CDKL5 Deficiency Disorder. *Pediatr Neurol* 2019;97:38-42. doi: 10.1016/j.pediatrneurol.2019.03.017
34. Dahl TH. International classification of functioning, disability and health: an introduction and discussion of its potential impact on rehabilitation services and research. *J Rehabil Med* 2002;34(5):201-4.
35. Killian JT, Jr., Lane JB, Lee HS, et al. Caretaker Quality of Life in Rett Syndrome: Disorder Features and Psychological Predictors. *Pediatr Neurol* 2016;58:67-74. doi: 10.1016/j.pediatrneurol.2015.12.021
36. Lane JB, Salter AR, Jones NE, et al. Assessment of Caregiver Inventory for Rett Syndrome. *J Autism Dev Disord* 2017;47(4):1102-12. doi: 10.1007/s10803-017-3034-3 [published Online First: 2017/01/31]
37. Motil KJ, Caeg E, Barrish JO, et al. Gastrointestinal and nutritional problems occur frequently throughout life in girls and women with Rett syndrome. *J PediatrGastroenterolNutr* 2012;55(3):292-98.
38. Motil KJ, Schultz RJ, Browning K, et al. Oropharyngeal dysfunction and gastroesophageal dysmotility are present in girls and women with Rett syndrome. *J Pediatr Gastroenterol Nutr* 1999;29(1):31-7.
39. Tarquinio DC, Motil KJ, Hou W, et al. Growth failure and outcome in Rett syndrome: specific growth references. *Neurology* 2012;79(16):1653-61.
40. Baikie G, Ravikumara M, Downs J, et al. Gastrointestinal dysmotility in Rett syndrome. *J Pediatr Gastroenterol Nutr* 2014;58(2):237-44. doi: 10.1097/MPG.0000000000000200
41. Sheen V, Valencia IM, Torres AR. Atypical features in MECP2 P152R-associated Rett syndrome. *Pediatr Neurol* 2013;49(2):124-6. doi: 10.1016/j.pediatrneurol.2012.12.037

42. Hollander E, Kolevzon A, Coyle JT. Textbook of autism spectrum disorders. 1st ed. Washington, DC: American Psychiatric Pub. 2011.
43. Didden R, Korzilius H, Smeets E, et al. Communication in Individuals with Rett Syndrome: an Assessment of Forms and Functions. *J Dev Phys Disabil* 2010;22(2):105-18. doi: 10.1007/s10882-009-9168-2
44. Downs J, Rodger J, Li C, et al. Environmental enrichment intervention for Rett syndrome: an individually randomised stepped wedge trial. *Orphanet J Rare Dis* 2018;13(1):3. doi: 10.1186/s13023-017-0752-8
45. Pillion JP, Rawool VW, Bibat G, et al. Prevalence of hearing loss in Rett syndrome. *Dev Med Child Neurol* 2003;45(5):338-43. doi: 10.1017/s0012162203000628 [published Online First: 2003/05/06]
46. Lenn NJ, Olsho LW, Turk WR. Auditory processing deficit in a patient with Rett syndrome. *Am J Med Genet Suppl* 1986;1:153-6.
47. Stauder JE, Smeets EE, van Mil SG, et al. The development of visual- and auditory processing in Rett syndrome: an ERP study. *Brain Dev* 2006;28(8):487-94. doi: 10.1016/j.braindev.2006.02.011
48. LeBlanc JJ, DeGregorio G, Centofante E, et al. Visual evoked potentials detect cortical processing deficits in Rett syndrome. *Ann Neurol* 2015;78(5):775-86. doi: 10.1002/ana.24513
49. McCauley MD, Wang T, Mike E, et al. Pathogenesis of lethal cardiac arrhythmias in Mecp2 mutant mice: implication for therapy in Rett syndrome. *SciTranslMed* 2011;3(113):113ra25.
50. Kerr AM, Armstrong DD, Prescott RJ, et al. Rett syndrome: analysis of deaths in the British survey. *Eur Child Adolesc Psychiatry* 1997;6 Suppl 1:71-4.
51. Crosson J, Srivastava S, Bibat GM, et al. Evaluation of QTc in Rett syndrome: Correlation with age, severity, and genotype. *Am J Med Genet A* 2017;173(6):1495-501. doi: 10.1002/ajmg.a.38191
52. Clark BC, Kopp A, Morey W, et al. Serial follow-up of corrected QT interval in Rett syndrome. *Dev Med Child Neurol* 2019 doi: 10.1111/dmcn.14419 [published Online First: 2019/12/05]
53. Glaze DG, Percy AK, Skinner S, et al. Epilepsy and the natural history of Rett syndrome. *Neurology* 2010;74(11):909-12.
54. Glaze DG, Schultz RJ, Frost JD. Rett syndrome: characterization of seizures versus non-seizures. *Electroencephalogr Clin Neurophysiol* 1998;106(1):79-83.
55. Tarquinio DC, Hou W, Berg A, et al. Longitudinal course of epilepsy in Rett syndrome and related disorders. *Brain* 2017;140(2):306-18. doi: 10.1093/brain/aww302
56. Henriksen MW, Breck H, von Tetzchner S, et al. Epilepsy in classic Rett syndrome: Course and characteristics in adult age. *Epilepsy Res* 2018;145:134-39. doi: 10.1016/j.epilepsyres.2018.06.012
57. Kako H, Martin DP, Cartabuke R, et al. Perioperative management of a patient with Rett syndrome. *Int J Clin Exp Med* 2013;6(5):393-403.
58. Tofil NM, Buckmaster MA, Winkler MK, et al. Deep sedation with propofol in patients with Rett syndrome. *J Child Neurol* 2006;21(3):210-3. doi: 10.2310/7010.2006.00051
59. Konarzewski WH, Misso S. Rett syndrome and delayed recovery from anaesthesia. *Anaesthesia* 1994;49(4):357.
60. Downs J, Geranton SM, Bebbington A, et al. Linking MECP2 and pain sensitivity: the example of Rett syndrome. *Am J Med Genet A* 2010;152A(5):1197-205. doi: 10.1002/ajmg.a.33314 [published Online First: 2010/04/29]
61. Hagberg B, Aicardi J, Dias K, et al. A progressive syndrome of autism, dementia, ataxia, and loss of purposeful hand use in girls: Rett's syndrome: report of 35 cases. *Ann Neurol* 1983;14(4):471-9. doi: 10.1002/ana.410140412
62. Glaze DG, Frost JD, Jr., Zoghbi HY, et al. Rett's syndrome: characterization of respiratory patterns and sleep. *Ann Neurol* 1987;21(4):377-82. doi: 10.1002/ana.410210410
63. Tarquinio DC, Hou W, Neul JL, et al. The course of awake breathing disturbances across the lifespan in Rett syndrome. *Brain Dev* 2018;40(7):515-29. doi: 10.1016/j.braindev.2018.03.010 [published Online First: 2018/04/17]



- 1  
2  
3 64. Motil KJ, Morrissey M, Caeg E, et al. Gastrostomy placement improves height and weight gain in  
4 girls with Rett syndrome. *J Pediatr Gastroenterol Nutr* 2009;49(2):237-42. doi:  
5 10.1097/MPG.0b013e31818f61fd  
6  
7 65. Downs J, Torode I, Wong K, et al. The Natural History of Scoliosis in Females With Rett Syndrome.  
8 *Spine (Phila Pa 1976)* 2016;41(10):856-63. doi: 10.1097/BRS.0000000000001399  
9  
10 66. Killian JT, Lane JB, Cutter GR, et al. Pubertal development in Rett syndrome deviates from typical  
11 females. *Pediatr Neurol* 2014;51(6):769-75. doi: 10.1016/j.pediatrneurol.2014.08.013 [published  
12 Online First: 2014/10/07]  
13  
14 67. Humphreys P, Barrowman N. The Incidence and Evolution of Parkinsonian Rigidity in Rett  
15 Syndrome: A Pilot Study. *Can J Neurol Sci* 2016;43(4):567-73. doi: 10.1017/cjn.2016.8  
16  
17 68. FitzGerald PM, Jankovic J, Percy AK. Rett syndrome and associated movement disorders. *Mov*  
18 *Disord* 1990;5(3):195-202. doi: 10.1002/mds.870050303  
19  
20 69. Roth JD, Pariser JJ, Stout TE, et al. Presentation and Management Patterns of Lower Urinary Tract  
21 Symptoms in Adults Due to Rare Inherited Neuromuscular Diseases. *Urology* 2020;135:165-70.  
22 doi: 10.1016/j.urology.2019.09.039 [published Online First: 2019/10/19]  
23  
24 70. Ward CS, Huang TW, Herrera JA, et al. Loss of MeCP2 Causes Urological Dysfunction and  
25 Contributes to Death by Kidney Failure in Mouse Models of Rett Syndrome. *PLoS One*  
26 2016;11(11):e0165550. doi: 10.1371/journal.pone.0165550  
27  
28 71. Freilinger M, Bohm M, Lanator I, et al. Prevalence, clinical investigation, and management of  
29 gallbladder disease in Rett syndrome. *Dev Med Child Neurol* 2014;56(8):756-62. doi:  
30 10.1111/dmcn.12358  
31  
32 72. Motil KJ, Lane JB, Barrish JO, et al. Biliary Tract Disease in Girls and Young Women with Rett  
33 Syndrome. *J Pediatr Gastroenterol Nutr* 2019 doi: 10.1097/MPG.0000000000002273  
34  
35 73. Kirby RS, Lane JB, Childers J, et al. Longevity in Rett syndrome: analysis of the North American  
36 Database. *J Pediatr* 2010;156(1):135-38 e1. doi: 10.1016/j.jpeds.2009.07.015  
37  
38 74. Halbach NS, Smeets EE, Schrandt-Stumpel CT, et al. Aging in people with specific genetic  
39 syndromes: Rett syndrome. *Am J Med Genet A* 2008;146A(15):1925-32.  
40  
41 75. Vignoli A, La Briola F, Peron A, et al. Medical care of adolescents and women with Rett syndrome:  
42 an Italian study. *Am J Med Genet A* 2012;158A(1):13-8. doi: 10.1002/ajmg.a.34367  
43  
44 76. Cianfagione R, Clarke A, Kerr M, et al. Ageing in Rett syndrome. *J Intellect Disabil Res*  
45 2016;60(2):182-90. doi: 10.1111/jir.12228  
46  
47 77. Motil KJ, Schultz RJ, Abrams S, et al. Fractional calcium absorption is increased in girls with Rett  
48 syndrome. *J Pediatr Gastroenterol Nutr* 2006;42(4):419-26. doi:  
49 10.1097/01.mpg.0000189370.22288.0c  
50  
51 78. Motil KJ, Ellis KJ, Barrish JO, et al. Bone mineral content and bone mineral density are lower in  
52 older than in younger females with Rett syndrome. *Pediatr Res* 2008;64(4):435-9. doi:  
53 10.1203/PDR.0b013e318180ebcd  
54  
55 79. Motil KJ, Barrish JO, Neul JL, et al. Low bone mineral mass is associated with decreased bone  
56 formation and diet in girls with Rett syndrome. *J Pediatr Gastroenterol Nutr* 2014;59(3):386-92.  
57 doi: 10.1097/MPG.0000000000000440 [published Online First: 2014/08/22]  
58  
59 80. Jefferson A, Leonard H, Siafarikas A, et al. Clinical Guidelines for Management of Bone Health in  
60 Rett Syndrome Based on Expert Consensus and Available Evidence. *PLoS One*  
2016;11(2):e0146824. doi: 10.1371/journal.pone.0146824  
61  
62 81. Motil KJ, Barrish JO, Lane J, et al. Vitamin D deficiency is prevalent in girls and women with Rett  
63 syndrome. *J Pediatr Gastroenterol Nutr* 2011;53(5):569-74.  
64  
65 82. Buchanan CB, Stallworth JL, Scott AE, et al. Behavioral profiles in Rett syndrome: Data from the  
66 natural history study. *Brain Dev* 2019;41(2):123-34. doi: 10.1016/j.braindev.2018.08.008  
67  
68 83. Lotan M, Merrick J, Kandel I, et al. Aging in persons with Rett syndrome: an updated review.  
69 *ScientificWorldJournal* 2010;10:778-87. doi: 10.1100/tsw.2010.79  
70  
71 84. Katz DM, Bird A, Coenraads M, et al. Rett Syndrome: Crossing the Threshold to Clinical Translation.  
72 *Trends Neurosci* 2016;39(2):100-13. doi: 10.1016/j.tins.2015.12.008

- 1  
2  
3 85. Erlandson A, Samuelsson L, Hagberg B, et al. Multiplex ligation-dependent probe amplification  
4 (MLPA) detects large deletions in the MECP2 gene of Swedish Rett syndrome patients. *Genet*  
5 *Test* 2003;7(4):329-32. doi: 10.1089/109065703322783707 [published Online First: 2004/03/06]  
6  
7 86. Gill H, Cheadle JP, Maynard J, et al. Mutation analysis in the MECP2 gene and genetic counselling  
8 for Rett syndrome. *J Med Genet* 2003;40(5):380-4. doi: 10.1136/jmg.40.5.380 [published Online  
9 First: 2003/05/15]  
10  
11 87. Temudo T, Ramos E, Dias K, et al. Movement disorders in Rett syndrome: an analysis of 60 patients  
12 with detected MECP2 mutation and correlation with mutation type. *Mov Disord*  
13 2008;23(10):1384-90. doi: 10.1002/mds.22115  
14  
15 88. Temudo T, Oliveira P, Santos M, et al. Stereotypies in Rett syndrome: analysis of 83 patients with and  
16 without detected MECP2 mutations. *Neurology* 2007;68(15):1183-7. doi:  
17 10.1212/01.wnl.0000259086.34769.78  
18  
19 89. Hagberg B. Clinical manifestations and stages of Rett syndrome. *Ment Retard Dev Disabil Res Rev*  
20 2002;8(2):61-5. doi: 10.1002/mrdd.10020 [published Online First: 2002/07/12]  
21  
22 90. Symons FJ, Byiers B, Hoch J, et al. Infrared Thermal Analysis and Individual Differences in Skin  
23 Temperature Asymmetry in Rett Syndrome. *Pediatr Neurol* 2015;53(2):169-72. doi:  
24 10.1016/j.pediatrneurol.2015.03.018 [published Online First: 2015/05/25]  
25  
26 91. Kerr AM, Julu PO. Recent insights into hyperventilation from the study of Rett syndrome. *Arch Dis*  
27 *Child* 1999;80(4):384-7. doi: 10.1136/adc.80.4.384 [published Online First: 1999/03/23]  
28  
29 92. Krajnc N. Severe respiratory dysrhythmia in Rett syndrome treated with topiramate. *J Child Neurol*  
30 2014;29(10):NP118-21. doi: 10.1177/0883073813508313  
31  
32 93. Gokben S, Ardic UA, Serdaroglu G. Use of buspirone and fluoxetine for breathing problems in Rett  
33 syndrome. *Pediatr Neurol* 2012;46(3):192-4. doi: 10.1016/j.pediatrneurol.2011.12.003  
34  
35 94. Chu DI, Tasian GE, Copelovitch L. Pediatric Kidney Stones - Avoidance and Treatment. *Curr Treat*  
36 *Options Pediatr* 2016;2(2):104-11. doi: 10.1007/s40746-016-0046-8 [published Online First:  
37 2016/10/22]  
38  
39 95. Marchand V, Motil KJ, Nutrition NCo. Nutrition support for neurologically impaired children: a  
40 clinical report of the North American Society for Pediatric Gastroenterology, Hepatology, and  
41 Nutrition. *J Pediatr Gastroenterol Nutr* 2006;43(1):123-35. doi:  
42 10.1097/01.mpg.0000228124.93841.ea  
43  
44 96. Leonard H, Ravikumara M, Baikie G, et al. Assessment and management of nutrition and growth in  
45 Rett syndrome. *J Pediatr Gastroenterol Nutr* 2013;57(4):451-60. doi:  
46 10.1097/MPG.0b013e31829e0b65  
47  
48 97. . In: Ross AC, Taylor CL, Yaktine AL, et al., eds. Dietary Reference Intakes for Calcium and Vitamin  
49 D. Washington (DC)2011.  
50  
51 98. Cook S, Hooper V, Nasser R, et al. Effect of gastrostomy on growth in children with  
52 neurodevelopmental disabilities. *Can J Diet Pract Res* 2005;66(1):19-24. doi:  
53 10.3148/66.1.2005.19  
54  
55 99. Percy AK, Lee HS, Neul JL, et al. Profiling scoliosis in Rett syndrome. *Pediatr Res* 2010;67(4):435-  
56 39.  
57  
58 100. Killian JT, Lane JB, Lee HS, et al. Scoliosis in Rett Syndrome: Progression, Comorbidities, and  
59 Predictors. *Pediatr Neurol* 2017;70:20-25. doi: 10.1016/j.pediatrneurol.2017.01.032 [published  
60 Online First: 2017/03/30]  
101. Downs J, Bergman A, Carter P, et al. Guidelines for management of scoliosis in Rett syndrome  
patients based on expert consensus and clinical evidence. *Spine (Phila Pa 1976)*  
2009;34(17):E607-E17.  
102. Downs J, Torode I, Wong K, et al. Surgical fusion of early onset severe scoliosis increases survival  
in Rett syndrome: a cohort study. *Dev Med Child Neurol* 2016;58(6):632-8. doi:  
10.1111/dmcn.12984 [published Online First: 2015/12/15]  
103. Tay G, Graham H, Graham HK, et al. Hip displacement and scoliosis in Rett syndrome - screening is  
required. *Dev Med Child Neurol* 2010;52(1):93-8. doi: 10.1111/j.1469-8749.2009.03359.x

- 1  
2  
3 104. Cass H, Reilly S, Owen L, et al. Findings from a multidisciplinary clinical case series of females  
4 with Rett syndrome. *Dev Med Child Neurol* 2003;45(5):325-37.  
5  
6 105. Hirano D, Taniguchi T. Skin injuries and joint contractures of the upper extremities in Rett  
7 syndrome. *J Intellect Disabil Res* 2018;62(1):53-59. doi: 10.1111/jir.12452 [published Online  
8 First: 2017/12/08]  
9  
10 106. Downs J, Bebbington A, Woodhead H, et al. Early determinants of fractures in Rett syndrome.  
11 *Pediatrics* 2008;121(3):540-6. doi: 10.1542/peds.2007-1641 [published Online First: 2008/03/04]  
12  
13 107. Jefferson AL, Woodhead HJ, Fyfe S, et al. Bone mineral content and density in Rett syndrome and  
14 their contributing factors. *Pediatr Res* 2011;69(4):293-8. doi: 10.1203/PDR.0b013e31820b937d  
15  
16 108. Freundlich K. Pressure Injuries in Medically Complex Children: A Review. *Children (Basel)*  
17 2017;4(4) doi: 10.3390/children4040025 [published Online First: 2017/04/08]  
18  
19 109. Stagi S, Cavalli L, Congiu L, et al. Thyroid function in Rett syndrome. *Horm Res Paediatr*  
20 2015;83(2):118-25. doi: 10.1159/000370066  
21  
22 110. Tauboll E, Sveberg L, Svalheim S. Interactions between hormones and epilepsy. *Seizure* 2015;28:3-  
23 11. doi: 10.1016/j.seizure.2015.02.012  
24  
25 111. Buchanan CB, Stallworth JL, Scott AE, et al. Behavioral profiles in Rett syndrome: Data from the  
26 natural history study. *Brain Dev* 2018 doi: 10.1016/j.braindev.2018.08.008 [published Online  
27 First: 2018/09/16]  
28  
29 112. Wong K, Leonard H, Jacoby P, et al. The trajectories of sleep disturbances in Rett syndrome. *J Sleep*  
30 *Res* 2015;24(2):223-33. doi: 10.1111/jsr.12240  
31  
32 113. Boban S, Leonard H, Wong K, et al. Sleep disturbances in Rett syndrome: Impact and management  
33 including use of sleep hygiene practices. *Am J Med Genet A* 2018;176(7):1569-77. doi:  
34 10.1002/ajmg.a.38829  
35  
36 114. Jan JE, Owens JA, Weiss MD, et al. Sleep hygiene for children with neurodevelopmental  
37 disabilities. *Pediatrics* 2008;122(6):1343-50. doi: 10.1542/peds.2007-3308  
38  
39 115. Dye TJ, Jain SV, Simakajornboon N. Outcomes of long-term iron supplementation in pediatric  
40 restless legs syndrome/periodic limb movement disorder (RLS/PLMD). *Sleep Med* 2017;32:213-  
41 19. doi: 10.1016/j.sleep.2016.01.008  
42  
43 116. Aurora RN, Zak RS, Karippot A, et al. Practice parameters for the respiratory indications for  
44 polysomnography in children. *Sleep* 2011;34(3):379-88. doi: 10.1093/sleep/34.3.379  
45  
46 117. Lai YYL, Wong K, King NM, et al. Oral health experiences of individuals with Rett syndrome: a  
47 retrospective study. *BMC Oral Health* 2018;18(1):195. doi: 10.1186/s12903-018-0651-y  
48 [published Online First: 2018/12/01]  
49  
50 118. Tarquinio DC, Hou W, Neul JL, et al. Age of diagnosis in Rett syndrome: patterns of recognition  
51 among diagnosticians and risk factors for late diagnosis. *Pediatr Neurol* 2015;52(6):585-91 e2.  
52 doi: 10.1016/j.pediatrneurol.2015.02.007  
53  
54 119. Lane JB, Lee HS, Smith LW, et al. Clinical severity and quality of life in children and adolescents  
55 with Rett syndrome. *Neurology* 2011;77(20):1812-18.  
56  
57 120. Mori Y, Downs J, Wong K, et al. Longitudinal effects of caregiving on parental well-being: the  
58 example of Rett syndrome, a severe neurological disorder. *Eur Child Adolesc Psychiatry*  
59 2019;28(4):505-20. doi: 10.1007/s00787-018-1214-0 [published Online First: 2018/08/29]  
60



1  
2  
3  
4  
5  
6  
7  
8  
9  
10  
11  
12  
13  
14  
15  
16  
17  
18  
19  
20  
21  
22  
23  
24  
25  
26  
27  
28  
29  
30  
31  
32  
33  
34  
35  
36  
37  
38  
39  
40  
41  
42  
43  
44  
45  
46  
47  
48  
49  
50  
51  
52  
53  
54  
55  
56  
57  
58  
59  
60

**Supplementary Table 1. Health supervision goals surrounding individuals with RTT by ICF contextual factors**

|                              | Early Childhood                                                                                                                                                                                                                                                                                             | Late Childhood                                                                                                                                                                                                                                                                                                                                               | Post-puberty                                                                                                                                                                                                                                                                                                                                                                | Ad                                                                                           |
|------------------------------|-------------------------------------------------------------------------------------------------------------------------------------------------------------------------------------------------------------------------------------------------------------------------------------------------------------|--------------------------------------------------------------------------------------------------------------------------------------------------------------------------------------------------------------------------------------------------------------------------------------------------------------------------------------------------------------|-----------------------------------------------------------------------------------------------------------------------------------------------------------------------------------------------------------------------------------------------------------------------------------------------------------------------------------------------------------------------------|----------------------------------------------------------------------------------------------|
| Body Functions and Structure | GI/Nutrition: Maintain adequate growth, bone health, and nutrition; manage reflux and constipation<br>Neurological: Identify and manage epilepsy when present; identify and manage autonomic dysfunction<br>Rehabilitation: develop strength and coordination<br>Cardiology: detect and manage prolonged QT | GI/Nutrition: Maintain adequate growth, bone health, and nutrition; manage reflux and constipation<br>Neurological: Identify and manage epilepsy when present; identify and manage autonomic dysfunction<br>Rehabilitation: regulate tone and prevent contractures<br>Cardiology: detect and manage prolonged QT<br>Orthopedics: detect and manage scoliosis | GI/Nutrition: Maintain nutrition and bone health; manage constipation; detect and manage gall bladder dysfunction<br>Neurological: Identify and manage epilepsy when present; identify and manage autonomic dysfunction<br>Rehabilitation: regulate tone and prevent contractures<br>Cardiology: detect and manage prolonged QT<br>Orthopedics detect and prevent fractures | GI<br>nut<br>ma<br>an<br>dys<br>Ne<br>ma<br>pre<br>aut<br>Re<br>an<br>Ca<br>pro<br>Or<br>pre |
| Environment                  | Education: Develop appropriate IEP<br>Therapies: Access to appropriate therapies<br>Socialization: Age-appropriate interactions and activities                                                                                                                                                              | Education: Develop appropriate IEP<br>Therapies: Access to appropriate therapies including physical, occupational, and assistive communication technologies<br>Socialization: Age-appropriate interactions and activities                                                                                                                                    | Education: Develop appropriate IEP<br>Therapies: Access to appropriate therapies including physical, occupational, and assistive communication technologies<br>Socialization: Age-appropriate interactions and activities                                                                                                                                                   | Ed<br>Da<br>Th<br>app<br>phy<br>ass<br>tec<br>So<br>app<br>act                               |

# BMJ Paediatrics Open

## Consensus guidelines on managing Rett Syndrome across the lifespan

|                               |                                                                                                                                                                                                                                                                                                                                                                                                                                                                                                                                                                                                                                                                                                                                                                                                                                                                                                                                                                                                                                                                                                                                                                                                                                                                                                                                                                                                                                                                                                                                                                                                                                                                                                                                                                                                                                                                                                                                                                                                                                                                                                                                                                                                            |
|-------------------------------|------------------------------------------------------------------------------------------------------------------------------------------------------------------------------------------------------------------------------------------------------------------------------------------------------------------------------------------------------------------------------------------------------------------------------------------------------------------------------------------------------------------------------------------------------------------------------------------------------------------------------------------------------------------------------------------------------------------------------------------------------------------------------------------------------------------------------------------------------------------------------------------------------------------------------------------------------------------------------------------------------------------------------------------------------------------------------------------------------------------------------------------------------------------------------------------------------------------------------------------------------------------------------------------------------------------------------------------------------------------------------------------------------------------------------------------------------------------------------------------------------------------------------------------------------------------------------------------------------------------------------------------------------------------------------------------------------------------------------------------------------------------------------------------------------------------------------------------------------------------------------------------------------------------------------------------------------------------------------------------------------------------------------------------------------------------------------------------------------------------------------------------------------------------------------------------------------------|
| Journal:                      | <i>BMJ Paediatrics Open</i>                                                                                                                                                                                                                                                                                                                                                                                                                                                                                                                                                                                                                                                                                                                                                                                                                                                                                                                                                                                                                                                                                                                                                                                                                                                                                                                                                                                                                                                                                                                                                                                                                                                                                                                                                                                                                                                                                                                                                                                                                                                                                                                                                                                |
| Manuscript ID                 | bmjpo-2020-000717.R3                                                                                                                                                                                                                                                                                                                                                                                                                                                                                                                                                                                                                                                                                                                                                                                                                                                                                                                                                                                                                                                                                                                                                                                                                                                                                                                                                                                                                                                                                                                                                                                                                                                                                                                                                                                                                                                                                                                                                                                                                                                                                                                                                                                       |
| Article Type:                 | Original research                                                                                                                                                                                                                                                                                                                                                                                                                                                                                                                                                                                                                                                                                                                                                                                                                                                                                                                                                                                                                                                                                                                                                                                                                                                                                                                                                                                                                                                                                                                                                                                                                                                                                                                                                                                                                                                                                                                                                                                                                                                                                                                                                                                          |
| Date Submitted by the Author: | 19-Jul-2020                                                                                                                                                                                                                                                                                                                                                                                                                                                                                                                                                                                                                                                                                                                                                                                                                                                                                                                                                                                                                                                                                                                                                                                                                                                                                                                                                                                                                                                                                                                                                                                                                                                                                                                                                                                                                                                                                                                                                                                                                                                                                                                                                                                                |
| Complete List of Authors:     | <p>Fu, Cary; Vanderbilt University Medical Center, Pediatrics and Neurology<br/>         Armstrong, Dallas; The Children's Hospital of Philadelphia, Neurology;<br/>         University of Pennsylvania, Neurology<br/>         Marsh, Eric; The Children's Hospital of Philadelphia, Neurology;<br/>         University of Pennsylvania, Neurology<br/>         Lieberman, David; Boston Children's Hospital, Neurology<br/>         Motil, Kay; Baylor College of Medicine, Pediatrics; USDA ARS, Children's<br/>         Nutrition Research Center<br/>         Witt, Rochelle; Boston Children's Hospital, Neurology<br/>         Standridge, Shannon; University of Cincinnati College of Medicine,<br/>         Pediatrics; Cincinnati Children's Hospital Medical Center, Neurology<br/>         Nues, Paige; International Rett Syndrome Foundation<br/>         Lane, Jane; The University of Alabama at Birmingham School of<br/>         Medicine, Civitan International Research Center<br/>         Dinkel, Tristen; Children's Hospital Colorado, Neurology<br/>         Coenraads, Monica; Rett Syndrome Research Trust<br/>         von Hehn, Jana; Rett Syndrome Research Trust<br/>         Jones, Mary; UCSF Benioff Children's Hospital Oakland, Pediatric<br/>         Medicine<br/>         Hale, Katie; UCSF Benioff Children's Hospital Oakland, Pediatric Medicine<br/>         Suter, Bernhard; Baylor College of Medicine, Pediatrics and Neurology;<br/>         Texas Children's Hospital, Neurology<br/>         Glaze, Daniel; Baylor College of Medicine, Pediatrics and Neurology;<br/>         Texas Children's Hospital, Neurology<br/>         Neul, Jeffrey; Vanderbilt Kennedy Center; Vanderbilt University Medical<br/>         Center, Pediatrics, Pharmacology, and Special Education<br/>         Percy, Alan; The University of Alabama at Birmingham School of<br/>         Medicine, Pediatrics, Neurology, Neurobiology, Genetics, and Psychology<br/>         Benke, Timothy; University of Colorado Denver School of Medicine,<br/>         Pediatrics, Pharmacology, Neurology, Otolaryngology; Children's Hospital<br/>         Colorado, Neurology</p> |
| Keywords:                     | Neurology, Genetics, Syndrome, Rehabilitation, Gastroenterology                                                                                                                                                                                                                                                                                                                                                                                                                                                                                                                                                                                                                                                                                                                                                                                                                                                                                                                                                                                                                                                                                                                                                                                                                                                                                                                                                                                                                                                                                                                                                                                                                                                                                                                                                                                                                                                                                                                                                                                                                                                                                                                                            |
|                               |                                                                                                                                                                                                                                                                                                                                                                                                                                                                                                                                                                                                                                                                                                                                                                                                                                                                                                                                                                                                                                                                                                                                                                                                                                                                                                                                                                                                                                                                                                                                                                                                                                                                                                                                                                                                                                                                                                                                                                                                                                                                                                                                                                                                            |

1  
2  
3  
4  
5  
6  
7  
8  
9  
10  
11  
12  
13  
14  
15  
16  
17  
18  
19  
20  
21  
22  
23  
24  
25  
26  
27  
28  
29  
30  
31  
32  
33  
34  
35  
36  
37  
38  
39  
40  
41  
42  
43  
44  
45  
46  
47  
48  
49  
50  
51  
52  
53  
54  
55  
56  
57  
58  
59  
60

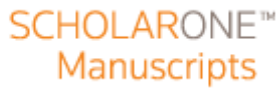



I, the Submitting Author has the right to grant and does grant on behalf of all authors of the Work (as defined in the below author licence), an exclusive licence and/or a non-exclusive licence for contributions from authors who are: i) UK Crown employees; ii) where BMJ has agreed a CC-BY licence shall apply, and/or iii) in accordance with the terms applicable for US Federal Government officers or employees acting as part of their official duties; on a worldwide, perpetual, irrevocable, royalty-free basis to BMJ Publishing Group Ltd ("BMJ") its licensees and where the relevant Journal is co-owned by BMJ to the co-owners of the Journal, to publish the Work in this journal and any other BMJ products and to exploit all rights, as set out in our [licence](#).

The Submitting Author accepts and understands that any supply made under these terms is made by BMJ to the Submitting Author unless you are acting as an employee on behalf of your employer or a postgraduate student of an affiliated institution which is paying any applicable article publishing charge ("APC") for Open Access articles. Where the Submitting Author wishes to make the Work available on an Open Access basis (and intends to pay the relevant APC), the terms of reuse of such Open Access shall be governed by a Creative Commons licence – details of these licences and which [Creative Commons](#) licence will apply to this Work are set out in our licence referred to above.

Other than as permitted in any relevant BMJ Author's Self Archiving Policies, I confirm this Work has not been accepted for publication elsewhere, is not being considered for publication elsewhere and does not duplicate material already published. I confirm all authors consent to publication of this Work and authorise the granting of this licence.

## Consensus guidelines on managing Rett Syndrome across the lifespan

Cary Fu MD<sup>a</sup>, Dallas Armstrong MD<sup>b</sup>, Eric D. Marsh MD PhD<sup>b</sup>, David N. Lieberman MD PhD<sup>c</sup>, Kathleen J. Motil MD PhD<sup>d</sup>, Rochelle Witt MD PhD<sup>c</sup>, Shannon Standridge DO MPH<sup>e</sup>, Paige Nues<sup>f</sup>, Jane Lane RN BSN<sup>g</sup>, Tristen Dinkel CNRN CPN RN BSN<sup>h</sup>, Monica Coenraads<sup>i</sup>, Jana von Hehn PhD<sup>i</sup>, Mary Jones MD MPH<sup>j</sup>, Katie Hale RN MS PNP<sup>j</sup>, Bernhard Suter MD<sup>k</sup>, Daniel G. Glaze MD<sup>k</sup>, Jeffrey L. Neul MD PhD<sup>l</sup>, Alan Percy, MD<sup>g,m</sup>, Tim A. Benke, MD PhD<sup>h,n</sup>

### Affiliations:

<sup>a</sup>Department of Pediatrics and Neurology, Vanderbilt University Medical Center, Nashville, TN; <sup>b</sup>Division of Neurology, Children's Hospital of Philadelphia and the Department of Neurology, Perelman School of Medicine at the University of Pennsylvania, Philadelphia PA; <sup>c</sup>Department of Neurology, Boston Children's Hospital; <sup>d</sup>Baylor College of Medicine, Department of Pediatrics, USDA/ARS Children's Nutrition Research Center, Houston, TX; <sup>e</sup>Department of Pediatrics, University of Cincinnati College of Medicine, Cincinnati, OH and Division of Neurology, Cincinnati Children's Hospital Medical Center, Cincinnati, OH; <sup>f</sup>International Rett Syndrome Foundation; <sup>g</sup>University of Alabama at Birmingham, School of Medicine, Civitan International Research Center, Birmingham, AL; <sup>h</sup>Children's Hospital Colorado, Department of Neurology, Aurora, CO; <sup>i</sup>Rett Syndrome Research Trust; <sup>j</sup>UCSF Benioff Children's Hospital Oakland, Department of Pediatric Medicine, Oakland, CA; <sup>k</sup>Baylor College of Medicine, Departments of Pediatrics and Neurology and Texas Children's Hospital, Houston, TX; <sup>l</sup>Vanderbilt Kennedy Center, Vanderbilt University Medical Center, Department of Pediatrics, Pharmacology, and Special Education, Nashville, TN; <sup>m</sup>University of Alabama at Birmingham, School of Medicine, Department of Pediatrics, Neurology, Neurobiology, Genetics, and Psychology, Birmingham, AL; <sup>n</sup>University of Colorado School of Medicine, Departments of Pediatrics, Pharmacology, Neurology, and Otolaryngology, and Children's Hospital Colorado, Department of Neurology, Aurora, CO.

**Corresponding author:** Tim A. Benke, MD PhD

Address: Children's Hospital Colorado, 13123 E 16<sup>th</sup>, Box B155/Neurology, Aurora, CO 80045, USA

Telephone: 303 724 3568

Email: tim.benke@cuanschutz.edu

**Short title:** Health guidance for Rett Syndrome

**Word Count:**

**Abstract: 182/300**

**Introduction: 592**

**Methods: 479**

**Results: 811**

**Discussion: 559**

**Total: 2441/2500**

**Tables: 7**

**Figures: 0**

**References: 120**

**Supplementary Tables: 1**

**Key words:** Rett syndrome, MECP2, primary care guidelines

**Funding Statement:** Cary Fu: International Rett Syndrome Foundation; Dallas Armstrong: Rett Syndrome Research Trust; Eric D. Marsh: NIH U54 HD061222, Rett Syndrome Research Trust; Rochelle M. Witt: Rett Syndrome Research Trust; David N. Lieberman: Rett Syndrome Research Trust, NIH U54 HD061222; Jane Lane: NIH U54 HD061222, Rett Syndrome Research Trust, International Rett Syndrome Foundation; Paige Nues: International Rett Syndrome Foundation; Kathleen J. Motil: International Rett Syndrome Foundation; Bernhard Suter: Blue Bird Circle, NIH U54 HD061222; Daniel G. Glaze: Blue Bird Circle, NIH U54 HD061222; Jeffery L. Neul: NIH U54 HD061222, U54 HD461222, Rett Syndrome Research Trust; Alan K. Percy: NIH U54 HD061222, Rett Syndrome Research Trust; Tim A. Benke: International Rett Syndrome Foundation, Rett Syndrome Research Trust, NIH U54 HD061222, Children's Hospital Colorado Foundation Ponzio Family Chair in Neurology Research.

**Competing Interest Statement:** Eric D. Marsh: Funding from the NIH and International Rett Syndrome Foundation; clinical trials with GW Pharmaceuticals, Zogenix, Marinus; Consultancy to Stoke therapeutics. David N. Lieberman: Consultancy for AveXis, clinical trials with Acadia, Anavex, GW Pharmaceuticals,. Shannon Standridge: Speaker Bureau for GW Pharmaceuticals. Bernhard Suter: Funding from the NIH and Blue Bird Circle; clinical trials with Acadia. Daniel G. Glaze: Funding from the NIH and Blue Bird Circle; clinical trials with GW Pharmaceuticals, Acadia, Anavex, Newron; Consultancy for Acadia and Trend Community Pharmaceuticals. Jeffery L. Neul: Funding from the NIH; Consultancy with Acadia, AveXis, Biohaven, GW Pharmaceuticals, Kurro, Neuren, Newron, Ovid, Takeda, and Teva. Jane Lane: Funding from NIH; Consultancy from International Rett Syndrome Foundation and GW Pharmaceuticals. Alan K. Percy: Funding from the NIH; Consultancy for Anavex, AveXis, Acadia, and GW Pharmaceuticals; Clinical Trials with Anavex, Acadia, GW Pharmaceuticals, and RSRT; Tim A. Benke: Funding from the NIH, International Foundation for CDKL5 Research, and Loulou Foundation. Consultancy for AveXis, Ovid, GW Pharmaceuticals, International Rett Syndrome Foundation, Takeda, and Marinus; Clinical Trials with Acadia, Ovid, GW Pharmaceuticals, Marinus and RSRT; All remuneration has been made to his department. The other authors have indicated they have no financial relationships relevant to this article to disclose.

**Abbreviations:**

ABR: auditory brainstem response

AAC: augmentative and alternative communication

CVI: cortical visual impairment

EI: Early Intervention

ICF: International Classification of Functioning, Disability and Health

IEP: Individualized Education Program (or Plan)

NHS: NIH-funded Natural History Study of Rett and related disorders

PCP: primary care provider

RTT: Rett Syndrome

TVI: teacher of the visually impaired

**Summary Box:**

**What is known:** Rett syndrome (RTT) is a multi-system and rare genetic disorder with similarities to other developmental encephalopathies. There are no peer-reviewed consensus-based therapeutic guidance to care in RTT.

**What this study adds:** Primary care providers and other health professionals caring for patients with RTT frequently have limited first-hand experience managing the disorder due to its rare prevalence. A consensus on guidance for health professionals caring for patients with RTT was developed based on literature review and expert opinion. This guidance is applicable to other rare and often severe neurodevelopmental disorders.



## Abstract

Background: Rett syndrome (RTT) is a severe neurodevelopmental disorder with complex medical co-morbidities extending beyond the nervous system requiring the attention of health professionals. There are no peer-reviewed consensus-based therapeutic guidance to care in RTT. The objective was to provide consensus on guidance of best practice for addressing these concerns.

Methods: Informed by the literature and using a modified Delphi approach, a consensus process was utilized to develop guidance for care in RTT by health professionals.

Results: Typical RTT presents early in childhood in a clinically recognizable fashion. Multisystem co-morbidities evolve throughout the lifespan requiring coordination of care between primary care and often multiple subspecialty providers. To assist health professionals and families in seeking best practice, a checklist and detailed references for guidance were developed by consensus.

Conclusions: The overall multisystem issues of RTT require primary care providers and other health professionals to manage complex medical co-morbidities within the context of the whole individual and family. Given the median life expectancy well into the 6<sup>th</sup> decade, guidance is provided to health professionals to achieve current best possible outcomes for these special-needs individuals.

## Introduction

Rett syndrome (RTT)<sup>1</sup> is a severe neurodevelopmental disorder with an estimated worldwide prevalence of between 1 in 20,000 to 40,000 people. RTT is one of the most common genetic causes of developmental and intellectual impairment in females<sup>2</sup>, affecting up to 1 in 10,000 girls under the age of 12. RTT is not a neurodegenerative condition<sup>3</sup>, rather it is a progressive disorder involving multisystem symptom evolution over time. Following demonstration of symptom reversal in mouse models<sup>4,5</sup>, there is flourishing hope for further disease modifying therapies.

Nearly all individuals with RTT have one of >300 distinct loss-of-function mutations in the *MECP2* gene on the X-chromosome<sup>6</sup>. This gene encodes methyl-CpG binding protein-2, an essential transcriptional regulator in the brain required for normal neurodevelopment<sup>7</sup>. Complete genetic testing involves sequencing and methods to detect larger deletions (e.g. multiplex ligation-dependent probe amplification (MLPA)) of the *MECP2* gene. Likely owing to the random nature of X-chromosome inactivation<sup>8</sup> and other genetic modifiers<sup>9-11</sup>, genotype-phenotype correlations are imprecise. However, a general pattern exists with some mutations (early truncating mutations such as R168X, R255X, R270X, large deletions and specific point mutations such as R106W) associated with increased severity compared to other mutation groups (R133C, R294X, R306X, and C-terminal truncations)<sup>12</sup>. *MECP2* mutations causing RTT are almost always *de novo* (spontaneous) and as such are not expected to recur in families.

The presentation is initially subtle in the first two years of life involving developmental delays and hypotonia on exam, but subsequent symptom evolution between 18-30 months of age with developmental regression and onset of repetitive, purposeless hand movements is striking<sup>13</sup>. The core clinical diagnostic features of RTT (Table 1, Typical and Atypical)<sup>1</sup> include a period of normal (or near normal) development followed by developmental regression with loss of language and hand function skills, impaired gait, and development of hand stereotypies causing life-long dependence<sup>14,15</sup>. The average age at RTT diagnosis of 2.5 years has been trending downward with increasing availability of diagnostic genetic testing<sup>16</sup>. The multisystem nature of the disorder has been documented within multiple observational studies with symptom risk evolving across the lifespan.

1  
2  
3 *MECP2* mutations have been identified rarely in males with neurodevelopmental disorders,  
4  
5 termed “male RTT encephalopathy”. The resulting developmental outcome is quite variable though with  
6  
7 symptomatology distinct from RTT and ranges in severity from a severe neonatal encephalopathy with  
8  
9 minimal developmental improvement to a mild intellectual disability<sup>17</sup>. Male RTT encephalopathy<sup>18</sup> and  
10  
11 other distinct developmental encephalopathies (historically linked to RTT)<sup>19</sup> such as *MECP2* duplication  
12  
13 syndrome<sup>20-22</sup>, *CDKL5* Deficiency Disorder<sup>23-26</sup> and *FOXG1* syndrome<sup>27-30</sup> may have similar approaches  
14  
15 (but distinct therapeutics) as more is learned about specific aspects of their clinical care. Alterations in  
16  
17 *MECP2*, *CDKL5* and *FOXG1* should be considered in all individuals, male and female, with  
18  
19 developmental delays and intellectual disability.  
20  
21

22 In the past two decades the natural history of RTT has been extensively studied<sup>31</sup>. Perhaps most  
23  
24 important to all health professionals managing this complex disorder is the knowledge that with  
25  
26 appropriate care, children with RTT will become adults with RTT; 70% live to at least 50 years of age<sup>14</sup>  
27  
28 <sup>32</sup>. As such, health professionals are often presented with the daunting task of effectively managing the  
29  
30 evolving medical comorbidities of the disorder throughout a patient’s lifespan. To help address this  
31  
32 challenge, based on a review of published literature regarding RTT symptomatology that identified the  
33  
34 most relevant primary care concerns through a modified Delphi consensus approach, we developed  
35  
36 recommendations regarding guidance for best practice. These recommendations have been organized  
37  
38 based on an age-dependent health supervision approach to facilitate the goal of effective and meaningful  
39  
40 care for individuals with RTT across all ages.  
41  
42  
43  
44

## 45 **Methods**

46  
47 Draft guidance was developed (MJ, KH and PN) and presented and discussed at bimonthly  
48  
49 International Rett Syndrome Foundation sponsored North American Rett Syndrome Clinics Network  
50  
51 conference calls between January 2016 through September 2018 with input obtained from 22 clinical  
52  
53 sites. An initial draft was presented January 2017 for external review by the Network through September  
54  
55 2018; additional public input was obtained from January 2019 to May 2019 through placement on the  
56  
57  
58  
59  
60

1  
2  
3 RettSyndrome.org website. With supervision by the group leader, the guidance was further refined  
4 substantially by eight Rett Centers (University of Alabama Birmingham, Vanderbilt University,  
5 Children's Hospital Colorado, Children's Hospital of Philadelphia, Cincinnati Children's Hospital,  
6 Boston Children's Hospital, UCSF Benioff Children's Hospital Oakland, and Texas Children's Hospital)  
7 providing multidisciplinary care for individuals with RTT, in partnership with the NIH-funded Natural  
8 History Study of Rett and related disorders (NHS, U54 HD061222; **ClinicalTrials.gov:**  
9 **NCT00299312/NCT02738281**) and two patient advocacy groups, Rett Syndrome Research Trust and the  
10 International Rett Syndrome Foundation. This consensus approach followed a modified Delphi process  
11 employed by members of this group previously<sup>33</sup>. The partners were chosen based on clinical experience  
12 across primary care, multiple subspecialties, health care delivery, and, importantly, patient-family  
13 experience with RTT. Conflicts of interest were vetted by the group leader with full knowledge by the  
14 group. A consensus led by the group leader surrounding relevant guidance based on published data and  
15 clinical opinion was developed through six further rounds of modifications. The results of a literature  
16 review were used to inform the guidance (paper submitted). The following recommendations were  
17 created based on an age-dependent health supervision approach to assist health professionals in fulfilling  
18 the goal of effective and meaningful care for individuals with RTT across all ages (Tables 2 and 3). Items  
19 are organized by prevalence at each age group. Consistent with International Classification of  
20 Functioning, Disability and Health (ICF) guidelines (WHO, 2001)<sup>34</sup>, this guidance recognizes the inter-  
21 relatedness of body function/structure, environment and personal factors to maximize activities and  
22 participation (Supplemental Table 1). Thus, in addition to routine assessment of medical issues (body  
23 function), several psychosocial, environmental, and educational concerns need to be assessed frequently  
24 to achieve the goal of family-centered service:

- 25 • The financial, emotional and physical impact on the family as a whole: sibling well-being, parent  
26 physical and mental health (sleep, grief, anxiety, depression), quality of life, and marital impacts<sup>35 36</sup>.
- 27 • Vigilance regarding signs and symptoms of abuse and neglect of an at-risk individual.
- 28 • Educational support programs for which the individual may be eligible.

- Government-sponsored income and other support benefits.
- Personal financial, community, and emotional support available to the family.

### **Patient involvement**

Patients family groups (International Rett Syndrome Foundation and Rett Syndrome Research Trust), represented by parents of individuals with RTT (Ms. Nues and Ms. Coenraads), were involved in the development of the patient care guidance and writing of this manuscript. Their organizations will assist with dissemination of the guidance.

### **Results**

The guidance was formulated into a checklist (Table 2) with further details and references (Tables 3-7) that informed the checklist and the consensus process. The guidance for management by health professionals was grouped by relevant features and therapeutic approaches at different ages. The checklist (Table 2) is suitable for use by health professionals as well as the family as part of their health care records with Tables 3-7 providing further detailed guidance.

*Diagnosis to 5 years old--Early Childhood:* Most features of RTT may emerge during this age period. Feeding difficulties and growth failure<sup>37-39</sup> begin during this age. Additional treatable gastrointestinal issues including dysmotility, gastroesophageal reflux, constipation, gas bloating, often presenting as irritability or apparent discomfort manifest commonly at this age<sup>37 40</sup>. The development of microcephaly or head growth stagnation (as early as 1.5 months)<sup>39</sup> is a common feature, though macrocephaly has also been seen<sup>41</sup>. Tone issues at this age are typically characterized by hypotonia<sup>42</sup>; early referral to therapists (physical, occupational, speech language including augmentative communication<sup>43</sup>) and establishment of an IEP<sup>44</sup> are necessary. Severe hearing loss is uncommon in RTT<sup>45</sup> but there may be delayed auditory processing<sup>46 47</sup> that mimics hearing impairment. There is increased risk of cortical visual impairment (CVI) and ocular apraxia in RTT<sup>48</sup>. There is evidence suggesting increased risk for prolonged QTc interval that may be present from a young age<sup>49-51</sup> and may develop with time<sup>52</sup>. The frequency of epileptic and non-epileptic spells<sup>53 54</sup> wax and wane throughout the

1  
2  
3 course<sup>53 55</sup>. Individuals with RTT generally respond to anticonvulsants<sup>53 55 56</sup> but there have been no  
4  
5 randomized, controlled trials of specific anticonvulsants for RTT. If hospitalized, it is important to  
6  
7 inform hospital staff of important issues in RTT individuals that could potentially confound or complicate  
8  
9 care. This includes a heightened sensitivity to the effects of anesthetics, potentially requiring lower doses  
10  
11 of anesthetic medications to achieve sedation<sup>57 58</sup> or longer time to awaken from general anesthesia<sup>59</sup>.  
12  
13 Though response to pain is altered in RTT<sup>60</sup>, the approach to analgesia should not be altered. Hospital  
14  
15 staff should also be aware of cold extremities<sup>61</sup>, irregular and disordered breathing with oxygen  
16  
17 desaturations<sup>62 63</sup>, impaired proprioception, lack of hand use, inability to change position, and increased  
18  
19 fall risk.  
20  
21

22 *5 years to the Pre-pubescent Stage--Late Childhood:* During the early school years, children with  
23  
24 RTT typically have stabilized developmentally; the regression phase has ended<sup>39</sup>. Overall, many of the  
25  
26 multisystem issues that arose during the first 5 years of life persist. Preventing undernutrition and  
27  
28 maintaining a healthy BMI is important, as this has been associated with better functioning<sup>38 64</sup>.  
29  
30 Surveillance for scoliosis becomes an important preventive measure; some children (~20%) ultimately  
31  
32 require spinal surgery for this comorbidity<sup>65</sup>. Longitudinal assessment of pubertal development indicates  
33  
34 an increased prevalence of early thelarche and adrenarche but delayed menarche<sup>66</sup>. Difficulties with  
35  
36 abnormal tone in this age range typically are characterized by hypotonia evolving to rigidity<sup>67 68</sup>.  
37  
38

39 *Post-puberty to the end of school (~21 years old)--Post-puberty:* Surveillance for scoliosis  
40  
41 continues to be an important preventive measure though this lessens with completion of puberty<sup>66</sup>.  
42  
43 Surveillance for urinary retention is important<sup>69 70</sup>. Biliary tract disease is seen in young adulthood at  
44  
45 rates similar to the general population but due to communication impairment in RTT the presenting  
46  
47 symptoms may be limited to irritability, weight loss and vomiting<sup>71 72</sup>. Studies of longevity in RTT  
48  
49 demonstrate survival of many into middle age, underscoring the need for the early development of a  
50  
51 comprehensive, thoughtful plan for transitioning to adulthood<sup>73</sup>. Longitudinal supervision is required in  
52  
53 RTT as physical, behavioral and cognitive limitations will not allow for independent living<sup>14 15</sup>. This may  
54  
55 include day programs and respite care.  
56  
57  
58  
59  
60

1  
2  
3                    *21 years and older--Adulthood:* Overall, individuals with RTT tend to stabilize clinically in  
4 young adulthood<sup>74-76</sup>. Frequent causes of hospitalization for women with RTT include pneumonia,  
5 respiratory distress, status epilepticus, rectal bleeding, decline in ambulation, or refusal/inability to eat or  
6 drink<sup>15</sup>. While one-third of individuals may have a gastrostomy tube, half of these continue to have some  
7 oral intake<sup>32</sup>. With age, concern for low bone mineral mass coupled with long-term use of particular  
8 anticonvulsants, raises the risks for osteoporosis and bone fractures<sup>77-79</sup> necessitating continued  
9 supplementation and monitoring of 25-OH Vitamin D status<sup>80 81</sup>. Musculoskeletal problems and gross  
10 motor function may worsen overall<sup>75</sup> possibly due to more parkinsonian features<sup>67</sup> but with overall  
11 preservation of intellect and memory<sup>15</sup>; additional study is needed due to relatively low numbers studied.  
12 Physical limitations, parkinsonian features, and high prevalence of social withdrawal behaviors lead to  
13 abnormal or decreased social interactions consistent with anxiety or depression<sup>82</sup>. Although the majority  
14 of women with RTT in the US live at home<sup>14</sup>, in other countries only about one-third of women over age  
15 16 with RTT live at home (either full or part-time) with the majority living in a residential facility<sup>15</sup>.  
16 Long-term and individually-tailored care that provides social interactions and physical activity should be  
17 provided at all ages to reduce age-related deterioration<sup>83</sup>.  
18  
19  
20  
21  
22  
23  
24  
25  
26  
27  
28  
29  
30  
31  
32  
33  
34  
35  
36

## 37 **Discussion**

38  
39                    Management of RTT requires input or expertise related to multiple specialties, often necessitating  
40 referrals to many providers in addition to the primary care provider. The above health guidance will  
41 evolve with further research into the longitudinal course of RTT by the NHS and others. However, there  
42 are limitations to the current proposed health guidance, specifically with respect to the lack of needed  
43 randomized clinical trials in a rare condition where interventions, such as physical and other therapies, are  
44 rarely standardized. While evaluation of annual ECG for prolonged QT appears supported by the  
45 literature<sup>49-52</sup>, the impact and outcomes of such surveillance need further study. At this time, longitudinal  
46 prognostic details are not well understood in certain areas of evaluation such as affect, displayed emotion  
47 and its meaning, the most appropriate manner to assess intelligence and how it evolves, or the life span of  
48  
49  
50  
51  
52  
53  
54  
55  
56  
57  
58  
59  
60

10



1  
2  
3 gynecologic concerns. Additional studies should also address the role and utility of palliative care and  
4 banking of post-mortem tissue. From this breadth of information, quality metrics with benchmarks can be  
5 defined to ensure standards of care with best outcomes for individuals with RTT.  
6  
7

8  
9 With the relative paucity of older individuals in the NHS and related studies, further study into  
10 the care of older individuals is needed to better address guidance more extensively for both older RTT  
11 women and for those more severely affected who are not routinely captured in most studies<sup>76</sup>.  
12  
13 Additionally, with current and future clinical trials, the disease course for individuals with RTT may be  
14 more modifiable with severity of symptoms and disease progression very different from our current  
15 understanding. There is considerable ongoing research in the field of specific RTT therapeutics<sup>84</sup>. It is  
16 therefore important for families, caregivers and health professionals to reach out to Rett Centers and  
17 family support group resources to stay up to date on clinical trials, drug approvals, and how this impacts  
18 these current care guidance. While a primary care provider may not be able to counsel on the suitability  
19 of different clinical trials, actively engaging RTT individuals and families and referring to clinical trials at  
20 specialty centers is necessary for the development of improved therapeutics.  
21  
22

23  
24 With the advances in healthcare and technology, improved and earlier genetic testing, robust  
25 research in RTT, and active patient advocacy from families and clinicians, individuals with RTT are  
26 surviving well into adulthood while living more healthy and meaningful lives. With the vast amount of  
27 medical knowledge emerging from research in RTT today and knowing the complexity of care RTT often  
28 requires, this proposed guidance can facilitate delivery of more thorough and well-rounded management  
29 and comprehensive surveillance by primary care providers and other health professionals caring for  
30 individuals with RTT. Importantly, the guidance also helps to outline considerations in which health  
31 professionals may want to refer the individual with RTT for more specialized management.  
32  
33

34  
35 In conclusion, Rett syndrome is a medically complex neurodevelopmental disorder impacting  
36 multiple organ systems in an evolving fashion from childhood through the 6<sup>th</sup> decade of adulthood.  
37  
38 Primary care providers and other health professionals tasked with coordinating care play an essential role  
39 in ensuring the long-term health and well-being of these individuals through effective screening practices,  
40  
41  
42  
43  
44  
45  
46  
47  
48  
49  
50  
51  
52  
53  
54  
55  
56  
57  
58  
59  
60

1  
2  
3 active management, and thoughtful coordination of subspecialty requirements. The accumulating  
4  
5 knowledge regarding the natural history of RTT serves as a vital resource to help providers anticipate the  
6  
7 complexities of this disorder.  
8  
9

### 10 11 12 13 **Web-links to regional RTT clinics for health professionals**

14  
15 <https://www.rettsyndrome.org/about-rett-syndrome/clinics>

16  
17 <https://reverserett.org/newly-diagnosed/#clinics-map>

18  
19  
20 <https://www.rettsyndrome.eu/>

### 21 22 23 **Useful web-links for families**

24  
25 <https://www.rettsyndrome.org/>

26  
27 <https://reverserett.org/>

28  
29 <https://www.rettsyndrome.org/for-families/resources-for-families>

30  
31 <https://www.rettsyndrome.eu/>

32  
33  
34  
35 **Contribution Statement:** Ms. Nues, Drs. Marsh, Jones, Neul, Percy and Benke conceptualized and  
36 designed the literature search and guidance. Ms. Nues and Dr. Jones initiated a first draft of Tables 2 and  
37 3. Drs. Fu, Armstrong, Lieberman, Marsh and Witt initiated the search and a first draft of the guidance.  
38 All authors participated in the consensus process in developing the guidance as described. Dr. Benke, as  
39 group leader, supervised and moderated the consensus process, initial drafts of the manuscript, the overall  
40 collation of the tables, manuscript, and guidance. All authors approved the final manuscript as submitted  
41 and agree to be accountable for all aspects of the work.  
42  
43

### 44 **Acknowledgements:**

45  
46 We sincerely thank all of the individuals and families that have participated in this research. Thanks to Dr.  
47 Walter Kaufmann for comments on a later stage of this manuscript.  
48  
49  
50  
51  
52  
53  
54  
55  
56  
57  
58  
59  
60

|    |                                                                                               |
|----|-----------------------------------------------------------------------------------------------|
| 1  |                                                                                               |
| 2  |                                                                                               |
| 3  |                                                                                               |
| 4  | Table 1. Classic (or Typical RTT) and Atypical RTT diagnostic criteria <sup>1</sup> .         |
| 5  | <b>Classic or Typical RTT diagnostic criteria</b>                                             |
| 6  | A period of regression followed by recovery or stabilization                                  |
| 7  | 1. Partial or complete loss of acquired purposeful hand skills                                |
| 8  | 2. Partial or complete loss of spoken language                                                |
| 9  | 3. Gait abnormalities: impaired or absence of ability                                         |
| 10 | 4. Stereotypic hand movements such as hand wringing/squeezing, clapping/tapping, mouthing and |
| 11 | washing/rubbing automatisms.                                                                  |
| 12 | <b>Atypical RTT diagnostic criteria</b>                                                       |
| 13 | A period of regression followed by recovery or stabilization                                  |
| 14 | 1. At least 2 of the 4 main criteria                                                          |
| 15 | 2. 5 of 11 supportive criteria                                                                |
| 16 | a) Breathing disturbances while awake                                                         |
| 17 | b) Bruxism while awake                                                                        |
| 18 | c) Impaired sleep                                                                             |
| 19 | d) Abnormal muscle tone                                                                       |
| 20 | e) Peripheral vasomotor disturbances                                                          |
| 21 | f) Scoliosis/kyphosis                                                                         |
| 22 | g) Growth retardation                                                                         |
| 23 | h) Small cold hands and feet                                                                  |
| 24 | i) Inappropriate laughing/screaming spells                                                    |
| 25 | j) Diminished response to pain                                                                |
| 26 | k) Intense eye communication – “eye pointing”                                                 |
| 27 |                                                                                               |
| 28 |                                                                                               |
| 29 |                                                                                               |
| 30 |                                                                                               |
| 31 |                                                                                               |
| 32 |                                                                                               |
| 33 |                                                                                               |
| 34 |                                                                                               |
| 35 |                                                                                               |
| 36 |                                                                                               |
| 37 |                                                                                               |
| 38 |                                                                                               |
| 39 |                                                                                               |
| 40 |                                                                                               |
| 41 |                                                                                               |
| 42 |                                                                                               |
| 43 |                                                                                               |
| 44 |                                                                                               |
| 45 |                                                                                               |
| 46 |                                                                                               |
| 47 |                                                                                               |
| 48 |                                                                                               |
| 49 |                                                                                               |
| 50 |                                                                                               |
| 51 |                                                                                               |
| 52 |                                                                                               |
| 53 |                                                                                               |
| 54 |                                                                                               |
| 55 |                                                                                               |
| 56 |                                                                                               |
| 57 |                                                                                               |
| 58 |                                                                                               |
| 59 |                                                                                               |
| 60 |                                                                                               |

**Table 2.** Health Supervision guidance as a checklist for individuals and PCP.

| <ul style="list-style-type: none"> <li>• <b>Individuals with Rett syndrome should be seen for regular wellness checkups, screenings and immunizations (especially influenza vaccinations)*.</b></li> <li>• <b>Inform staff that extra time will be needed for visit, especially to inspecting the individual without braces, shoes and outer clothing.</b></li> <li>• <b>Parents and care-givers should keep a binder of health records to include: genetic testing results, summaries of all doctor visits (including specialist referrals), summaries of hospital admissions, laboratory studies, ECG, x-ray reports and other imaging results.</b></li> </ul> |                                                                                                                                                                                                                                                                                                                                                                                                                                                                                                                                                                          |                       |                              |          |
|------------------------------------------------------------------------------------------------------------------------------------------------------------------------------------------------------------------------------------------------------------------------------------------------------------------------------------------------------------------------------------------------------------------------------------------------------------------------------------------------------------------------------------------------------------------------------------------------------------------------------------------------------------------|--------------------------------------------------------------------------------------------------------------------------------------------------------------------------------------------------------------------------------------------------------------------------------------------------------------------------------------------------------------------------------------------------------------------------------------------------------------------------------------------------------------------------------------------------------------------------|-----------------------|------------------------------|----------|
| Areas of Assessment                                                                                                                                                                                                                                                                                                                                                                                                                                                                                                                                                                                                                                              | Assessment Details                                                                                                                                                                                                                                                                                                                                                                                                                                                                                                                                                       | Yearly Wellness Visit | Primary Care every 6 months* | Baseline |
| <b>Genetics/<br/>MECP2 Testing Results</b>                                                                                                                                                                                                                                                                                                                                                                                                                                                                                                                                                                                                                       | Counsel family on genetic test results and refer to genetic counselor if appropriate for additional counsel or explanation. Family and PCP to keep a copy of genetic results.                                                                                                                                                                                                                                                                                                                                                                                            |                       |                              | ✓        |
| <b>General</b>                                                                                                                                                                                                                                                                                                                                                                                                                                                                                                                                                                                                                                                   | Update current medications and allergies                                                                                                                                                                                                                                                                                                                                                                                                                                                                                                                                 |                       | At every visit               |          |
|                                                                                                                                                                                                                                                                                                                                                                                                                                                                                                                                                                                                                                                                  | Weight                                                                                                                                                                                                                                                                                                                                                                                                                                                                                                                                                                   |                       | At every visit               |          |
|                                                                                                                                                                                                                                                                                                                                                                                                                                                                                                                                                                                                                                                                  | Height or body length                                                                                                                                                                                                                                                                                                                                                                                                                                                                                                                                                    |                       | At every visit               |          |
|                                                                                                                                                                                                                                                                                                                                                                                                                                                                                                                                                                                                                                                                  | Body mass index                                                                                                                                                                                                                                                                                                                                                                                                                                                                                                                                                          |                       | At every visit               |          |
|                                                                                                                                                                                                                                                                                                                                                                                                                                                                                                                                                                                                                                                                  | Head circumference <sup>1</sup>                                                                                                                                                                                                                                                                                                                                                                                                                                                                                                                                          |                       | At every visit               |          |
|                                                                                                                                                                                                                                                                                                                                                                                                                                                                                                                                                                                                                                                                  | Tanner Stage                                                                                                                                                                                                                                                                                                                                                                                                                                                                                                                                                             |                       | At yearly wellness           |          |
|                                                                                                                                                                                                                                                                                                                                                                                                                                                                                                                                                                                                                                                                  | <b>Laboratory evaluations</b> (see below)                                                                                                                                                                                                                                                                                                                                                                                                                                                                                                                                |                       | (see below)                  |          |
| <b>Gastrointestinal</b>                                                                                                                                                                                                                                                                                                                                                                                                                                                                                                                                                                                                                                          | Review: feeding methods, appetite, chewing ability, choking and length of feeding time.                                                                                                                                                                                                                                                                                                                                                                                                                                                                                  | ✓                     | ✓                            |          |
|                                                                                                                                                                                                                                                                                                                                                                                                                                                                                                                                                                                                                                                                  | Screen for GE reflux, gas bloating, biliary tract disease, constipation and hemorrhoids, skin tags, or fissures.                                                                                                                                                                                                                                                                                                                                                                                                                                                         | ✓                     | ✓                            |          |
| <b>Nutrition</b>                                                                                                                                                                                                                                                                                                                                                                                                                                                                                                                                                                                                                                                 | Review nutritional and herbal supplements<br>Nutrition screening <sup>2</sup> : energy, protein, fluids, sodium, potassium, calcium, and vitamin D intake.<br>Consider nutrition related laboratory screening (yearly): CBC, electrolyte panel, 25-OH-vitamin D, fasting lipids                                                                                                                                                                                                                                                                                          | ✓                     | ✓                            |          |
| <b>Respiratory</b>                                                                                                                                                                                                                                                                                                                                                                                                                                                                                                                                                                                                                                               | Screen for awake disordered breathing (hyperventilating, breath-holding, color change), and air swallowing.                                                                                                                                                                                                                                                                                                                                                                                                                                                              | ✓                     |                              |          |
| <b>Neurology</b>                                                                                                                                                                                                                                                                                                                                                                                                                                                                                                                                                                                                                                                 | Screen for presence of paroxysmal events (seizures or non-epileptic spells suspicious for seizures). Advise caregivers to keep a log with description of distinct event types and frequency. Refer to Neurology if an event occurs repeatedly for diagnostic clarification. Encourage follow-up with neurologist routinely; every 6 months if treated for seizures. If individual's weight fluctuates (more than 10-20%), request neurologist to consider adjusting anticonvulsant doses accordingly. Laboratory follow-up as needed for use of antiseizure medications. | ✓                     | ✓                            | ✓        |
|                                                                                                                                                                                                                                                                                                                                                                                                                                                                                                                                                                                                                                                                  | Screen for abnormal movements (stereotypies and dystonia) and level of impact on daily                                                                                                                                                                                                                                                                                                                                                                                                                                                                                   | ✓                     |                              | ✓        |

|                                       |                                                                                                                                                                                                                                                                                                                       |        |                         |   |
|---------------------------------------|-----------------------------------------------------------------------------------------------------------------------------------------------------------------------------------------------------------------------------------------------------------------------------------------------------------------------|--------|-------------------------|---|
|                                       | activities.                                                                                                                                                                                                                                                                                                           |        |                         |   |
| <b>Cardiology</b>                     | 12-lead ECG to screen for prolonged QTc interval; if abnormal, refer to Cardiology.                                                                                                                                                                                                                                   | ✓      |                         | ✓ |
| <b>Skin</b>                           | Document temperature and color of hands and feet. Screen for skin breakdown from hand-mouthing or ill-fitting braces. Screen for pressure ulcers.                                                                                                                                                                     | ✓      | ✓                       |   |
| <b>Orthopedics<br/>Rehabilitation</b> | Estimate curvature of spine. Recheck every 6 months if scoliosis present; refer to Orthopedics if > 20 degrees.                                                                                                                                                                                                       | ✓      | (if scoliosis present✓) |   |
|                                       | Screen for abnormal hip abduction, range of motion and leg length.                                                                                                                                                                                                                                                    | ✓      | ✓                       |   |
|                                       | Screen for contractures and use or need of devices to prevent them (ankle-foot orthoses and splints).                                                                                                                                                                                                                 | ✓      |                         |   |
|                                       | Discuss risk of fractures due to osteopenia.<br>Screen for needs and use of mobility aids.                                                                                                                                                                                                                            | ✓<br>✓ |                         |   |
| <b>Urology</b>                        | Review toilet training, frequency and infrequency of urination, and urinary tract infections. Refer to Urology for frequent urinary tract infections or urinary retention. Consider Urology related laboratory screening (every 2 years): urinalysis                                                                  | ✓      |                         |   |
| <b>Development</b>                    | Documentation of baseline, gains and losses of milestones. Fine motor: hand use: raking grasp, pincer grasp, rake, holding cup or spoon. Gross motor: sitting, standing, and walking. Language: coo, babble, laugh, words.                                                                                            | ✓      |                         | ✓ |
| <b>Communication</b>                  | Screen communication methods used by family and school: eye pointing, vocalizations, switches, ipad, eye-gaze device.                                                                                                                                                                                                 | ✓      |                         | ✓ |
| <b>Behavioral</b>                     | Screen for symptoms of anxiety and depression, such as withdrawal, screaming and irritability. Inquire about sensory processing difficulties.                                                                                                                                                                         | ✓      | ✓                       | ✓ |
| <b>Sleep</b>                          | Review sleep initiation, staying asleep, snoring or coughing, and frequency of nocturnal interventions by caregivers. Review safety of bed and bedroom. Consider laboratory evaluation for iron deficiency if concerns arise about disrupted sleep or restless leg syndrome: ferritin, serum iron, TIBC, transferrin. | ✓      | ✓                       | ✓ |
| <b>Pain</b>                           | Discuss delayed pain response and describe individual's response to pain.                                                                                                                                                                                                                                             | ✓      |                         |   |
| <b>Extremities</b>                    | Temperature dysregulation. Review environmental factors that might impact comfort.                                                                                                                                                                                                                                    | ✓      |                         |   |
| <b>Screenings</b>                     | Screen for vision concerns and consider referral for formal vision assessment including acuity, spatial, depth, visual fields and cortical visual impairment.                                                                                                                                                         | ✓      |                         |   |
|                                       | Review newborn ABR results at baseline, consider repeating ABR if history of chronic otitis media, consider evaluation for auditory processing delay.                                                                                                                                                                 | ✓      |                         | ✓ |
|                                       | Annual dental health screening; refer for cleaning every 6 months.                                                                                                                                                                                                                                                    | ✓      |                         |   |
| <b>Education/Therapies</b>            | Review for presence of current IEP (see info on RettSyndrome.org)                                                                                                                                                                                                                                                     | ✓      |                         | ✓ |
|                                       | Documentation of therapies (type and frequency).                                                                                                                                                                                                                                                                      | ✓      |                         |   |
| <b>Family/Social</b>                  | Assess for family stress (financial, social, fatigue)                                                                                                                                                                                                                                                                 | ✓      | ✓                       | ✓ |
| <b>Resources</b>                      | Review available community and insurance resources (disabled parking permit, respite care etc.)<br>In adolescent individuals review plans for obtaining guardianship. Clinician may be required                                                                                                                       | ✓      |                         |   |

|  |                                                                                       |  |  |  |
|--|---------------------------------------------------------------------------------------|--|--|--|
|  | to write Letters of Medical Necessity for equipment and sign school medication forms. |  |  |  |
|--|---------------------------------------------------------------------------------------|--|--|--|

\*6month follow-up visit is medically necessary to screen for issues that can appear quickly, progress rapidly and require intervention

<sup>1</sup>Please see CDC or Nellhaus head circumference chart for age 0-18 years

<sup>2</sup>Please see **Food and Drink Log** (<https://www.rettsyndrome.org/pcg>) to ensure adequate calcium, vitamin D, energy and fluid intake

Confidential: For Review Only

**Tables 3-7. Detailed approaches to management and therapy for RTT.** References not specific to RTT noted as “See:”.

| <b>Table 3: Genetics, Neurology, Cardiology, Respiratory, and Urology</b> |                                                                       |                                                                                                                                                                                                                                                                                                                                                                                                                                                                                                                                                                                                                                                                                  |                   |
|---------------------------------------------------------------------------|-----------------------------------------------------------------------|----------------------------------------------------------------------------------------------------------------------------------------------------------------------------------------------------------------------------------------------------------------------------------------------------------------------------------------------------------------------------------------------------------------------------------------------------------------------------------------------------------------------------------------------------------------------------------------------------------------------------------------------------------------------------------|-------------------|
| <b>System/Area</b>                                                        | <b>Common concerns and questions</b>                                  | <b>Details and suggested approach</b>                                                                                                                                                                                                                                                                                                                                                                                                                                                                                                                                                                                                                                            | <b>References</b> |
| <b>Genetics</b>                                                           | <i>MECP2</i> gene                                                     | For suspicion of Rett syndrome, <i>MECP2</i> gene sequencing and MLPA testing is recommended. MLPA testing is needed to detect deletions otherwise missed by sequencing; this test is necessary if no abnormalities are found by sequencing. Referral to a geneticist or genetic counselor is recommended to review recurrence risks and answer related questions. Genetic testing results are essential for enrollment in clinical trials. Referral to a Rett Center if feasible may be useful to provide multidisciplinary care and access to clinical trials.                                                                                                                 | 16 85 86          |
| <b>Neurology</b>                                                          | Seizures and Spells                                                   | Refer to neurologist for seizures and spells suspicious for seizures with follow-up every 6 months if treated with an anticonvulsant. It is difficult to differentiate between a non-epileptic Rett Spell and a seizure (both may be present). Individuals can have multiple types of seizures. Seizure logs by the family are needed with careful description of events that includes frequency and duration. Videos of events are helpful to the neurologist. The neurologist may order a video EEG to accurately characterize whether a type of event is a seizure or not. An overnight EEG may be necessary to capture sleep; an EEG is incomplete if sleep is not captured. | 53-56             |
|                                                                           | Abnormal movements                                                    | Ataxic gait and an impaired spatial awareness (proprioception) are common. Stereotypical hand movements (hand-wringing, mouthing, etc) are typical. These are often disruptive to hand use. Use of splints to elbows or hand guards, which may be prescribed by an OT, may be helpful to improve hand use. Initially, most individuals have low tone that progresses over years to high tone and dystonia. Neurologist or physiatrist may prescribe neuromuscular blockade or other medications to reduce tone to maintain function and prevent contractures.                                                                                                                    | 67 68 87 88       |
| <b>Cardiology</b>                                                         | Abnormal ECG                                                          | Yearly ECG to check for prolonged QTc interval which can develop at any time. Referral to cardiologist if the ECG is abnormal, who may consider further studies (Holter monitor, echocardiogram) or treatment. Avoid prescription of medications that can prolong QTc interval (i.e. fluoxetine). A current ECG is recommended before anesthesia.                                                                                                                                                                                                                                                                                                                                | 49-52             |
|                                                                           | Poor circulation                                                      | Distal temperature asymmetries are common and thought to be autonomic in origin; no specific therapy is recommended.                                                                                                                                                                                                                                                                                                                                                                                                                                                                                                                                                             | 61 89 90          |
| <b>Respiratory</b>                                                        | Hyperventilation, air swallowing, breath holding, blowing raspberries | Due to autonomic dysregulation, these may occur during the day. While not purposeful, they may be triggered by anxiety. Currently, there are no medications or treatments for this. If night time apneas are present, check tonsils and consider ordering a comprehensive sleep study and related specialist referral. Breathing abnormalities may disrupt feeding.                                                                                                                                                                                                                                                                                                              | 62 63 91-93       |
| <b>Urology</b>                                                            | Urine retention                                                       | Autonomic dysfunction can lead to delayed bladder emptying and bladder distension. If present, referral to urology may be needed. Constipation can increase risk of UTIs. Toilet training can be achieved in some cases. Certain medications or poor fluid intake can cause increase risk of kidney stones.                                                                                                                                                                                                                                                                                                                                                                      | 69 70 See: 94     |



**Table 4: Gastroenterology and Nutrition**

| <b>System/Area</b>                    | <b>Common concerns and questions</b> | <b>Details and suggested approach</b>                                                                                                                                                                                                                                                                                                                                                                                                                                                                                                                                                                                                      | <b>References</b> |
|---------------------------------------|--------------------------------------|--------------------------------------------------------------------------------------------------------------------------------------------------------------------------------------------------------------------------------------------------------------------------------------------------------------------------------------------------------------------------------------------------------------------------------------------------------------------------------------------------------------------------------------------------------------------------------------------------------------------------------------------|-------------------|
| <b>Gastroenterology and Nutrition</b> | Dysmotility                          | Abdominal pain and discomfort typically are caused by reflux, gas bloating, delayed stomach emptying, biliary tract disease, or constipation; these can be empirically diagnosed and managed (see below). These will present with abdominal fullness (gas or constipation), irritability (reflux or constipation), nocturnal arousals (reflux or constipation), arching (reflux), overt reflux or emesis, burping (reflux or air swallowing). Gall bladder dysfunction, screened by abdominal ultrasound, should be considered. Referral to surgery for cholecystectomy may be necessary for symptomatic gallstones or biliary dyskinesia. | 37 38 40 72       |
|                                       | Constipation                         | <u>This is a very common problem.</u> Laxatives (polyethylene glycol, magnesium hydroxide, glycerin or bisacodyl suppositories) are often a part of long-term treatment with a goal of one soft bowel movement per day.                                                                                                                                                                                                                                                                                                                                                                                                                    | 37 40             |
|                                       | Reflux                               | <u>This is a very common problem.</u> PPI or H2 blockers are used empirically. Referral to gastroenterologist may be necessary to rule out complications such as esophagitis, ulcer, strictures, or Barrett's esophagus.                                                                                                                                                                                                                                                                                                                                                                                                                   | 37 40             |
|                                       | Poor weight gain                     | Fatigue and irritability may be signs that dietary requirements are not being met; consider energy dense foods (oils, syrups, avocado), gastroenterologist, and nutrition consults. Gastrostomy-button may be needed to maintain growth; counsel families that use of a gastrostomy button does not preclude oral feeding as long as oral feeding is safe. Use CDC/WHO growth charts to track growth and try to keep at same BMI percentile on growth curve through adolescent growth spurt. RTT-specific growth charts are also available.                                                                                                | 37-39 95 96       |
|                                       | Calcium/Vitamin D                    | Ensure supplemental Vitamin D intake: 600-1000 IU or more daily. Target serum levels of 25-OH-Vitamin D greater than 30-40 ng/ml.<br>Ensure milk and dairy products to provide age-appropriate dietary calcium intakes: 1-3 y, 700 mg/d; 4-8 y, 1000 mg/d; 9-18 y, 1300 mg/d; 19 y and older, 1000 mg/d. 240 ml (8 oz) of milk or 240 ml (8 oz) of yogurt contains 300 mg of calcium.                                                                                                                                                                                                                                                      | 77-79 See: 97     |
|                                       | Prolonged feeding times              | Long feeding times (more than 30 minutes) can affect quality of life for patient and family; this may be an indication that a gastrostomy button is needed.                                                                                                                                                                                                                                                                                                                                                                                                                                                                                | 64 96 See: 98     |
|                                       | Chewing/swallowing difficulties      | Referral to appropriate therapist or gastroenterologist to assess if there is concern for aspiration (coughing, choking, gagging with feeding or aspiration or unexplained pneumonia). In some cases, thickeners for liquids may be helpful to prevent aspiration versus need for a gastrostomy button.                                                                                                                                                                                                                                                                                                                                    | 37 38             |

| <b>Table 5: Orthopedics, Rehabilitation, Skin, Endocrine, and Hospitalization</b> |                                                                |                                                                                                                                                                                                                                                                                                                                                                                                                                                                                                                                                                                                                                                                                                                                                    |                     |
|-----------------------------------------------------------------------------------|----------------------------------------------------------------|----------------------------------------------------------------------------------------------------------------------------------------------------------------------------------------------------------------------------------------------------------------------------------------------------------------------------------------------------------------------------------------------------------------------------------------------------------------------------------------------------------------------------------------------------------------------------------------------------------------------------------------------------------------------------------------------------------------------------------------------------|---------------------|
| <b>System/Area</b>                                                                | <b>Common concerns and questions</b>                           | <b>Details and suggested approach</b>                                                                                                                                                                                                                                                                                                                                                                                                                                                                                                                                                                                                                                                                                                              | <b>References</b>   |
| <b>Orthopedics, Rehabilitation</b>                                                | Scoliosis                                                      | Increased risk of neuromuscular scoliosis after age 6; risk typically abates after puberty. This can progress rapidly if present, necessitating re-observation every 6 months if present. Supine x-ray and orthopedic referral when scoliotic curvature greater than 20 degrees; correction may be indicated when greater than 40 degrees. Kyphosis is more common in ambulatory individuals.                                                                                                                                                                                                                                                                                                                                                      | 65 99-102           |
|                                                                                   | Increased risk of hip subluxation                              | Examine hip range of motion due to high risk for hip subluxation and contractures, as either may be source of pain and cause for irritability. X-ray-AP views of pelvis may be needed to evaluate femoral head coverage.                                                                                                                                                                                                                                                                                                                                                                                                                                                                                                                           | 103                 |
|                                                                                   | Contractures                                                   | Encourage families and caregivers to inspect all joints and practice daily range of motion, especially if mobility is reduced in an acute setting (illness or hospitalization). Consider OT and PT consults for bracing and splinting. Consider neurology and physiatry consults for neuromuscular blockade or other medications to improve tone.                                                                                                                                                                                                                                                                                                                                                                                                  | 104 105             |
|                                                                                   | Osteopenia and fractures                                       | There is higher risk of fracture due to immobility and use of anticonvulsants. If fracture occurs, consider DEXA scan and referral to endocrine specialist (in addition to aggressive screen of calcium, vitamin D intake and 25-OH-vitamin D levels). Cause for fractures beyond osteopenia needs investigation in order to eliminate other preventable causes, such as falling out of bed (needs rails), falling at home (needs assessment of home) or non-accidental trauma.                                                                                                                                                                                                                                                                    | 77-81 95 97 106 107 |
|                                                                                   | Equipment                                                      | There is risks of injury due to outgrown equipment (See Skin above). Family and caregivers may need lifts, shower accommodations, bed-side toilets, etc.; these needs may be best assessed by a physiatry referral.                                                                                                                                                                                                                                                                                                                                                                                                                                                                                                                                | See: 108            |
| <b>Skin</b>                                                                       | Breakdown from mouthing or equipment or lack of re-positioning | Redness persisting longer than 20 min after equipment (such as a splint) is removed is of concern for development of pressure ulcers; return to PT to re-fit equipment. OT or PT may prescribe splints on elbows or hands to prevent skin breakdown from mouthing. Decubitus ulcer may need consultation with wound specialist and equipment specialist.                                                                                                                                                                                                                                                                                                                                                                                           | 105                 |
| <b>Endocrinology, Gynecology</b>                                                  | Premature adrenarche                                           | Menarche comes later, but breast buds and pubic hair may begin earlier than in typically developing children. Periods may be irregular due to low body weight or stress; T4, TSH should be checked if periods are irregular. Counsel family to notice whether or not seizure frequency corresponds with menstrual cycle and alert neurologist. Consideration of menses suppression should be considered, especially if it disrupts the interactions with caregivers and family or hormonal fluctuations correspond with increased seizure activity. The impact of menses suppression on bone health should be considered; IUD is a consideration. Avoidance of DEPO-provera is a consideration. Well-woman examination should include breast exam. | 66 109 See: 110     |
| <b>Hospitalization</b>                                                            | Anesthesia sensitivity, impaired proprioception                | Individuals may be more sensitive to effects of anesthetics. They may take longer to awaken from anesthesia. It is important to ensure anesthesiologist is aware of current medications (especially anticonvulsants and cannabis preparations), type and description of seizures, breathing abnormalities and risk of presence of prolonged QTc; a recent ECG is essential. Hospital needs to be aware of impaired proprioception, lack of hand use, inability to change position and increased fall risk. If hospitalized, family or hospital should perform daily ROM to prevent contractures.                                                                                                                                                   | 49-51 57-59 62 63   |

**Table 6: Psychological, Behavioral, Sleep, Pain, and Screenings**

| <b>System/Area</b>               | <b>Common concerns and questions</b>     | <b>Details and suggested approach</b>                                                                                                                                                                                                                                                                                                                                                                                                                                                                      | <b>References</b>    |
|----------------------------------|------------------------------------------|------------------------------------------------------------------------------------------------------------------------------------------------------------------------------------------------------------------------------------------------------------------------------------------------------------------------------------------------------------------------------------------------------------------------------------------------------------------------------------------------------------|----------------------|
| <b>Psychological, Behavioral</b> | Issues with inattention/anxiety          | Auditory processing is delayed and may be misinterpreted as disinterest; allow for this delay when assessing non-verbal language by allowing additional time for responses to questions or commands. Behavioral inconsistency is typical and may be affected by physical factors such as sleep or environment. Assess for intolerance of excessive stimuli (i.e. bright lights, loud noises).                                                                                                              | 46 47                |
|                                  | Externalizing/internalizing behaviors    | Screen for caregiver impressions of anxiety and depression, such as withdrawal; these may become more prominent with age or in individuals with milder clinical presentations. Identify possible contributors (e.g., sedating medications, decreased social interaction, limited access to engaging activities). Consider treatment with an SSRI such as escitalopram which may have a lower risk of inducing a prolonged QTc interval.                                                                    | 15 76 82 111         |
| <b>Sleep</b>                     | Disrupted sleep                          | Circadian rhythm is often disrupted; consider melatonin to initiate sleep and trazodone or clonidine to maintain asleep. Patient may be getting out of bed, which could be unsafe; consider a tent-style bed or similar engineering controls to keep child in bed and safe. Consider ferritin, serum iron, TIBC and transferrin levels if there is disrupted sleep or concerns for restless leg syndrome and need for iron replacement. Consider overnight sleep study for snoring or pauses in breathing. | 112 113 See: 114-116 |
| <b>Pain</b>                      | Pain assessment and sensitivity          | Individuals have an atypical pain response giving appearance of decreased sensitivity and have variable indications of pain (i.e. grimace, crying, increase in repetitive movements); typical pain scales may be difficult to interpret or apply.                                                                                                                                                                                                                                                          | 60                   |
|                                  | Increased risk of chronic pain           | Often due to GI problems (see above), dental problems, immobility and positioning. Always consider hip subluxation, vertebral compression fractures or other fractures as cause of pain.                                                                                                                                                                                                                                                                                                                   | 37 40 71 72          |
| <b>Screening: Ophthalmology</b>  | Difficult vision assessment              | Since eye gaze is the main way of communicating, assessment by a practitioner familiar with special needs individuals and cortical visual impairment is needed. Practitioner familiar with cortical visual impairment and ocular apraxia is needed.                                                                                                                                                                                                                                                        | 48 104               |
| <b>Screening: Auditory</b>       | Auditory processing delay                | Hearing is typically normal and assessments are often difficult to obtain but if chronic otitis media is present, these are needed.                                                                                                                                                                                                                                                                                                                                                                        | 45                   |
| <b>Screening: Dental</b>         | Teeth grinding, increased risk of caries | Routine cleanings needed and may require anesthesia. Dental work under anesthesia should be done with proper anesthesia support at major medical institutions. Regular dental care is required to avoid tooth extraction; tooth extraction significantly interferes with oral function and is to therefore be avoided if at all possible.                                                                                                                                                                  | 88 117               |

| <b>Table 7: Development, Education, Therapies, Social, and Alternative Medications</b> |                                      |                                                                                                                                                                                                                                                                                                                                                                                                                                                                                                                                                                                                                                                                                                                                                                                                                                                                                                                                                                                                                                                                                                                                                                                                                                                                                                                                                                                                                                                                                                                 |                   |
|----------------------------------------------------------------------------------------|--------------------------------------|-----------------------------------------------------------------------------------------------------------------------------------------------------------------------------------------------------------------------------------------------------------------------------------------------------------------------------------------------------------------------------------------------------------------------------------------------------------------------------------------------------------------------------------------------------------------------------------------------------------------------------------------------------------------------------------------------------------------------------------------------------------------------------------------------------------------------------------------------------------------------------------------------------------------------------------------------------------------------------------------------------------------------------------------------------------------------------------------------------------------------------------------------------------------------------------------------------------------------------------------------------------------------------------------------------------------------------------------------------------------------------------------------------------------------------------------------------------------------------------------------------------------|-------------------|
| <b>System/Area</b>                                                                     | <b>Common concerns and questions</b> | <b>Details and suggested approach</b>                                                                                                                                                                                                                                                                                                                                                                                                                                                                                                                                                                                                                                                                                                                                                                                                                                                                                                                                                                                                                                                                                                                                                                                                                                                                                                                                                                                                                                                                           | <b>References</b> |
| <b>Development, Education and Therapies</b>                                            | Developmental Milestones             | Developmental regression (reduced hand use and language) typically stops between 2-3 years. Skills can be maintained and possibly regained with vigorous therapies. Therapies to consider: speech therapy (ST), feeding therapy (FT), occupational therapy (OT), augmentative communication therapy (AAC), vision therapy (VT), hippotherapy (horse) and swim/pool therapy.                                                                                                                                                                                                                                                                                                                                                                                                                                                                                                                                                                                                                                                                                                                                                                                                                                                                                                                                                                                                                                                                                                                                     | 43 44 48 104 118  |
|                                                                                        | IEP and therapy challenges           | Educators may not have experience with Rett syndrome. Request they focus on communication, mobility, and socialization with attention to apraxia. Educators and therapists need to be informed that the approach to therapy in Rett syndrome is different: it is about maintaining skills as well as recovery. Therapies for Rett syndrome should include occupational, physical, speech, swallow and augmentative communication. Therapy that maximizes physical activities should be life-long, as these will minimize long-term complications and maximize long-term potentials. Educational opportunities that provide intensive physical, occupational and speech therapy, especially those that provide augmentative communication, allow individuals to learn and make the best progress. If CVI is present, then a Teacher of the Visually Impaired (TVI) should be included in the IEP. These essential accommodations to facilitate education are in accordance with disability rights legislation enacted in many countries throughout the world as required by the United Nations Convention on the Rights of Persons with Disabilities (CRPD). This international treaty signed by nearly all 193 U.N. Member States defines access to an inclusive, quality and free education as a basic human right of individuals with disabilities. Families should work with schools to develop an IEP that recognizes this; referral to a Rett Specialist may provide additional assistance in this regard. | 43 44             |
|                                                                                        | Non-verbal communication             | Alternative and augmentative communication assessments are needed. While this can be done by some speech therapists, a specific referral may be needed. Since eye gaze is typically the most effective form of communication, special eye gaze devices can give individuals a voice. These referrals should be made as early as possible to coincide with typical language development. Devices should be made available to individuals at both home and school. Home use is to be encouraged as this setting may be the longest after the child graduates from the school system.                                                                                                                                                                                                                                                                                                                                                                                                                                                                                                                                                                                                                                                                                                                                                                                                                                                                                                                              | 43 104            |
| <b>Social Concerns</b>                                                                 | Increased family stress              | Family may need respite care. Sibling reactions and their adjustment should be considered; families could provide education for extended family and friends to understand Rett syndrome through patient advocacy group websites. When appropriate, discussion of Rett genetics with older siblings of child-bearing age should be considered by referral to a genetic counselor.                                                                                                                                                                                                                                                                                                                                                                                                                                                                                                                                                                                                                                                                                                                                                                                                                                                                                                                                                                                                                                                                                                                                | 35 36 119 120     |
| <b>Alternative medications</b>                                                         | Cannabis, St John's wort, etc.       | Families should be encouraged to disclose use of alternative medications (cannabis, oils etc) to all specialists.                                                                                                                                                                                                                                                                                                                                                                                                                                                                                                                                                                                                                                                                                                                                                                                                                                                                                                                                                                                                                                                                                                                                                                                                                                                                                                                                                                                               |                   |

## References

1. Neul JL, Kaufmann WE, Glaze DG, et al. Rett syndrome: revised diagnostic criteria and nomenclature. *AnnNeurol* 2010;68(6):944-50.
2. Hagberg B. Rett's syndrome: prevalence and impact on progressive severe mental retardation in girls. *Acta Paediatr Scand* 1985;74(3):405-8.
3. Armstrong DD. Rett syndrome neuropathology review 2000. *Brain Dev* 2001;23 Suppl 1:S72-6.
4. Guy J, Gan J, Selfridge J, et al. Reversal of neurological defects in a mouse model of Rett syndrome. *Science* 2007;315(5815):1143-7. doi: 10.1126/science.1138389
5. Sinnott SE, Hector RD, Gadalla KKE, et al. Improved MECP2 Gene Therapy Extends the Survival of MeCP2-Null Mice without Apparent Toxicity after Intracisternal Delivery. *Mol Ther Methods Clin Dev* 2017;5:106-15. doi: 10.1016/j.omtm.2017.04.006
6. Neul JL, Fang P, Barrish J, et al. Specific mutations in methyl-CpG-binding protein 2 confer different severity in Rett syndrome. *Neurology* 2008;70(16):1313-21.
7. Tillotson R, Bird A. The Molecular Basis of MeCP2 Function in the Brain. *J Mol Biol* 2019 doi: 10.1016/j.jmb.2019.10.004 [published Online First: 2019/10/21]
8. Archer H, Evans J, Leonard H, et al. Correlation between clinical severity in patients with Rett syndrome with a p.R168X or p.T158M MECP2 mutation, and the direction and degree of skewing of X-chromosome inactivation. *J Med Genet* 2007;44(2):148-52. doi: 10.1136/jmg.2006.045260
9. Grillo E, Lo RC, Bianciardi L, et al. Revealing the complexity of a monogenic disease: rett syndrome exome sequencing. *PLoSOne* 2013;8(2):e56599.
10. Artuso R, Papa FT, Grillo E, et al. Investigation of modifier genes within copy number variations in Rett syndrome. *J Hum Genet* 2011;56(7):508-15. doi: 10.1038/jhg.2011.50
11. Zeev BB, Bebbington A, Ho G, et al. The common BDNF polymorphism may be a modifier of disease severity in Rett syndrome. *Neurology* 2009;72(14):1242-7. doi: 10.1212/01.wnl.0000345664.72220.6a
12. Cuddapah VA, Pillai RB, Shekar KV, et al. Methyl-CpG-binding protein 2 (MECP2) mutation type is associated with disease severity in Rett syndrome. *J MedGenet* 2014;51(3):152-58.
13. Hagberg B, Goutieres F, Hanefeld F, et al. Rett syndrome: criteria for inclusion and exclusion. *Brain Dev* 1985;7(3):372-3. doi: 10.1016/s0387-7604(85)80048-6
14. Tarquinio DC, Hou W, Neul JL, et al. The Changing Face of Survival in Rett Syndrome and MECP2-Related Disorders. *Pediatr Neurol* 2015;53(5):402-11. doi: 10.1016/j.pediatrneurol.2015.06.003
15. Halbach N, Smeets E, Steinbusch C, et al. Aging in Rett syndrome: a longitudinal study. *ClinGenet* 2012
16. Fehr S, Bebbington A, Nassar N, et al. Trends in the diagnosis of Rett syndrome in Australia. *Pediatr Res* 2011;70(3):313-9. doi: 10.1203/PDR.0b013e3182242461
17. Villard L. MECP2 mutations in males. *J Med Genet* 2007;44(7):417-23. doi: 10.1136/jmg.2007.049452
18. Neul JL, Benke TA, Marsh ED, et al. The array of clinical phenotypes of males with mutations in Methyl-CpG binding protein 2. *Am J Med Genet B Neuropsychiatr Genet* 2019;180(1):55-67. doi: 10.1002/ajmg.b.32707
19. Paciorkowski AR, Seltzer LE, Neul JL. Developmental Encephalopathies. In: Swaiman KF, Ashwal S, Ferriero DM, et al., eds. Swaiman's Pediatric Neurology. 6 ed. Philadelphia: Mosby 2018:242-48.
20. Ramocki MB, Tavyev YJ, Peters SU. The MECP2 duplication syndrome. *Am J Med Genet A* 2010;152A(5):1079-88. doi: 10.1002/ajmg.a.33184 [doi] [published Online First: 2010/04/29]
21. Miguet M, Faivre L, Amiel J, et al. Further delineation of the MECP2 duplication syndrome phenotype in 59 French male patients, with a particular focus on morphological and neurological



- features. *J Med Genet* 2018;55(6):359-71. doi: 10.1136/jmedgenet-2017-104956 [published Online First: 2018/04/06]
22. Peters SU, Fu C, Suter B, et al. Characterizing the Phenotypic Effect of Xq28 Duplication Size in MECP2 Duplication Syndrome. *Clin Genet* 2019 doi: 10.1111/cge.13521
23. Bahi-Buisson N, Villeneuve N, Caietta E, et al. Recurrent mutations in the CDKL5 gene: genotype-phenotype relationships. *AmJ MedGenetA* 2012;158A(7):1612-19.
24. Mangatt M, Wong K, Anderson B, et al. Prevalence and onset of comorbidities in the CDKL5 disorder differ from Rett syndrome. *Orphanet J Rare Dis* 2016;11:39. doi: 10.1186/s13023-016-0418-y
25. Mori Y, Downs J, Wong K, et al. Impacts of caring for a child with the CDKL5 disorder on parental wellbeing and family quality of life. *Orphanet J Rare Dis* 2017;12(1):16. doi: 10.1186/s13023-016-0563-3
26. Olson HE, Demarest ST, Pestana-Knight EM, et al. Cyclin-Dependent Kinase-Like 5 Deficiency Disorder: Clinical Review. *Pediatr Neurol* 2019 doi: 10.1016/j.pediatrneurol.2019.02.015
27. Florian C, Bahi-Buisson N, Bienvenu T. FOXP1-Related Disorders: From Clinical Description to Molecular Genetics. *MolSyndromol* 2012;2(3-5):153-63.
28. Ma M, Adams HR, Seltzer LE, et al. Phenotype Differentiation of FOXP1 and MECP2 Disorders: A New Method for Characterization of Developmental Encephalopathies. *J Pediatr* 2016;178:233-40 e10. doi: 10.1016/j.jpeds.2016.08.032
29. Vegas N, Cavallin M, Maillard C, et al. Delineating FOXP1 syndrome: From congenital microcephaly to hyperkinetic encephalopathy. *Neurol Genet* 2018;4(6):e281. doi: 10.1212/NXG.0000000000000281
30. Mitter D, Pringsheim M, Kaulisch M, et al. FOXP1 syndrome: genotype-phenotype association in 83 patients with FOXP1 variants. *Genet Med* 2018;20(1):98-108. doi: 10.1038/gim.2017.75
31. Percy AK, Neul JL, Glaze DG, et al. Rett syndrome diagnostic criteria: lessons from the Natural History Study. *AnnNeurol* 2010;68(6):951-55.
32. Anderson A, Wong K, Jacoby P, et al. Twenty years of surveillance in Rett syndrome: what does this tell us? *Orphanet J Rare Dis* 2014;9:87. doi: 10.1186/1750-1172-9-87
33. Demarest S, Pestana-Knight EM, Olson HE, et al. Severity Assessment in CDKL5 Deficiency Disorder. *Pediatr Neurol* 2019;97:38-42. doi: 10.1016/j.pediatrneurol.2019.03.017
34. Dahl TH. International classification of functioning, disability and health: an introduction and discussion of its potential impact on rehabilitation services and research. *J Rehabil Med* 2002;34(5):201-4.
35. Killian JT, Jr., Lane JB, Lee HS, et al. Caretaker Quality of Life in Rett Syndrome: Disorder Features and Psychological Predictors. *Pediatr Neurol* 2016;58:67-74. doi: 10.1016/j.pediatrneurol.2015.12.021
36. Lane JB, Salter AR, Jones NE, et al. Assessment of Caregiver Inventory for Rett Syndrome. *J Autism Dev Disord* 2017;47(4):1102-12. doi: 10.1007/s10803-017-3034-3 [published Online First: 2017/01/31]
37. Motil KJ, Caeg E, Barrish JO, et al. Gastrointestinal and nutritional problems occur frequently throughout life in girls and women with Rett syndrome. *J PediatrGastroenterolNutr* 2012;55(3):292-98.
38. Motil KJ, Schultz RJ, Browning K, et al. Oropharyngeal dysfunction and gastroesophageal dysmotility are present in girls and women with Rett syndrome. *J Pediatr Gastroenterol Nutr* 1999;29(1):31-7.
39. Tarquinio DC, Motil KJ, Hou W, et al. Growth failure and outcome in Rett syndrome: specific growth references. *Neurology* 2012;79(16):1653-61.
40. Baikie G, Ravikumara M, Downs J, et al. Gastrointestinal dysmotility in Rett syndrome. *J Pediatr Gastroenterol Nutr* 2014;58(2):237-44. doi: 10.1097/MPG.0000000000000200
41. Sheen V, Valencia IM, Torres AR. Atypical features in MECP2 P152R-associated Rett syndrome. *Pediatr Neurol* 2013;49(2):124-6. doi: 10.1016/j.pediatrneurol.2012.12.037

42. Hollander E, Kolevzon A, Coyle JT. Textbook of autism spectrum disorders. 1st ed. Washington, DC: American Psychiatric Pub. 2011.
43. Didden R, Korzilius H, Smeets E, et al. Communication in Individuals with Rett Syndrome: an Assessment of Forms and Functions. *J Dev Phys Disabil* 2010;22(2):105-18. doi: 10.1007/s10882-009-9168-2
44. Downs J, Rodger J, Li C, et al. Environmental enrichment intervention for Rett syndrome: an individually randomised stepped wedge trial. *Orphanet J Rare Dis* 2018;13(1):3. doi: 10.1186/s13023-017-0752-8
45. Pillion JP, Rawool VW, Bibat G, et al. Prevalence of hearing loss in Rett syndrome. *Dev Med Child Neurol* 2003;45(5):338-43. doi: 10.1017/s0012162203000628 [published Online First: 2003/05/06]
46. Lenn NJ, Olsho LW, Turk WR. Auditory processing deficit in a patient with Rett syndrome. *Am J Med Genet Suppl* 1986;1:153-6.
47. Stauder JE, Smeets EE, van Mil SG, et al. The development of visual- and auditory processing in Rett syndrome: an ERP study. *Brain Dev* 2006;28(8):487-94. doi: 10.1016/j.braindev.2006.02.011
48. LeBlanc JJ, DeGregorio G, Centofante E, et al. Visual evoked potentials detect cortical processing deficits in Rett syndrome. *Ann Neurol* 2015;78(5):775-86. doi: 10.1002/ana.24513
49. McCauley MD, Wang T, Mike E, et al. Pathogenesis of lethal cardiac arrhythmias in Mecp2 mutant mice: implication for therapy in Rett syndrome. *SciTranslMed* 2011;3(113):113ra25.
50. Kerr AM, Armstrong DD, Prescott RJ, et al. Rett syndrome: analysis of deaths in the British survey. *Eur Child Adolesc Psychiatry* 1997;6 Suppl 1:71-4.
51. Crosson J, Srivastava S, Bibat GM, et al. Evaluation of QTc in Rett syndrome: Correlation with age, severity, and genotype. *Am J Med Genet A* 2017;173(6):1495-501. doi: 10.1002/ajmg.a.38191
52. Clark BC, Kopp A, Morey W, et al. Serial follow-up of corrected QT interval in Rett syndrome. *Dev Med Child Neurol* 2019 doi: 10.1111/dmcn.14419 [published Online First: 2019/12/05]
53. Glaze DG, Percy AK, Skinner S, et al. Epilepsy and the natural history of Rett syndrome. *Neurology* 2010;74(11):909-12.
54. Glaze DG, Schultz RJ, Frost JD. Rett syndrome: characterization of seizures versus non-seizures. *Electroencephalogr Clin Neurophysiol* 1998;106(1):79-83.
55. Tarquinio DC, Hou W, Berg A, et al. Longitudinal course of epilepsy in Rett syndrome and related disorders. *Brain* 2017;140(2):306-18. doi: 10.1093/brain/aww302
56. Henriksen MW, Breck H, von Tetzchner S, et al. Epilepsy in classic Rett syndrome: Course and characteristics in adult age. *Epilepsy Res* 2018;145:134-39. doi: 10.1016/j.epilepsyres.2018.06.012
57. Kako H, Martin DP, Cartabuke R, et al. Perioperative management of a patient with Rett syndrome. *Int J Clin Exp Med* 2013;6(5):393-403.
58. Tofil NM, Buckmaster MA, Winkler MK, et al. Deep sedation with propofol in patients with Rett syndrome. *J Child Neurol* 2006;21(3):210-3. doi: 10.2310/7010.2006.00051
59. Konarzewski WH, Misso S. Rett syndrome and delayed recovery from anaesthesia. *Anaesthesia* 1994;49(4):357.
60. Downs J, Geranton SM, Bebbington A, et al. Linking MECP2 and pain sensitivity: the example of Rett syndrome. *Am J Med Genet A* 2010;152A(5):1197-205. doi: 10.1002/ajmg.a.33314 [published Online First: 2010/04/29]
61. Hagberg B, Aicardi J, Dias K, et al. A progressive syndrome of autism, dementia, ataxia, and loss of purposeful hand use in girls: Rett's syndrome: report of 35 cases. *Ann Neurol* 1983;14(4):471-9. doi: 10.1002/ana.410140412
62. Glaze DG, Frost JD, Jr., Zoghbi HY, et al. Rett's syndrome: characterization of respiratory patterns and sleep. *Ann Neurol* 1987;21(4):377-82. doi: 10.1002/ana.410210410
63. Tarquinio DC, Hou W, Neul JL, et al. The course of awake breathing disturbances across the lifespan in Rett syndrome. *Brain Dev* 2018;40(7):515-29. doi: 10.1016/j.braindev.2018.03.010 [published Online First: 2018/04/17]



- 1  
2  
3 64. Motil KJ, Morrissey M, Caeg E, et al. Gastrostomy placement improves height and weight gain in  
4 girls with Rett syndrome. *J Pediatr Gastroenterol Nutr* 2009;49(2):237-42. doi:  
5 10.1097/MPG.0b013e31818f61fd  
6  
7 65. Downs J, Torode I, Wong K, et al. The Natural History of Scoliosis in Females With Rett Syndrome.  
8 *Spine (Phila Pa 1976)* 2016;41(10):856-63. doi: 10.1097/BRS.0000000000001399  
9  
10 66. Killian JT, Lane JB, Cutter GR, et al. Pubertal development in Rett syndrome deviates from typical  
11 females. *Pediatr Neurol* 2014;51(6):769-75. doi: 10.1016/j.pediatrneurol.2014.08.013 [published  
12 Online First: 2014/10/07]  
13  
14 67. Humphreys P, Barrowman N. The Incidence and Evolution of Parkinsonian Rigidity in Rett  
15 Syndrome: A Pilot Study. *Can J Neurol Sci* 2016;43(4):567-73. doi: 10.1017/cjn.2016.8  
16  
17 68. FitzGerald PM, Jankovic J, Percy AK. Rett syndrome and associated movement disorders. *Mov*  
18 *Disord* 1990;5(3):195-202. doi: 10.1002/mds.870050303  
19  
20 69. Roth JD, Pariser JJ, Stout TE, et al. Presentation and Management Patterns of Lower Urinary Tract  
21 Symptoms in Adults Due to Rare Inherited Neuromuscular Diseases. *Urology* 2020;135:165-70.  
22 doi: 10.1016/j.urology.2019.09.039 [published Online First: 2019/10/19]  
23  
24 70. Ward CS, Huang TW, Herrera JA, et al. Loss of MeCP2 Causes Urological Dysfunction and  
25 Contributes to Death by Kidney Failure in Mouse Models of Rett Syndrome. *PLoS One*  
26 2016;11(11):e0165550. doi: 10.1371/journal.pone.0165550  
27  
28 71. Freilinger M, Bohm M, Lanator I, et al. Prevalence, clinical investigation, and management of  
29 gallbladder disease in Rett syndrome. *Dev Med Child Neurol* 2014;56(8):756-62. doi:  
30 10.1111/dmcn.12358  
31  
32 72. Motil KJ, Lane JB, Barrish JO, et al. Biliary Tract Disease in Girls and Young Women with Rett  
33 Syndrome. *J Pediatr Gastroenterol Nutr* 2019 doi: 10.1097/MPG.0000000000002273  
34  
35 73. Kirby RS, Lane JB, Childers J, et al. Longevity in Rett syndrome: analysis of the North American  
36 Database. *J Pediatr* 2010;156(1):135-38 e1. doi: 10.1016/j.jpeds.2009.07.015  
37  
38 74. Halbach NS, Smeets EE, Schrandt-Stumpel CT, et al. Aging in people with specific genetic  
39 syndromes: Rett syndrome. *Am J Med Genet A* 2008;146A(15):1925-32.  
40  
41 75. Vignoli A, La Briola F, Peron A, et al. Medical care of adolescents and women with Rett syndrome:  
42 an Italian study. *Am J Med Genet A* 2012;158A(1):13-8. doi: 10.1002/ajmg.a.34367  
43  
44 76. Cianfaglione R, Clarke A, Kerr M, et al. Ageing in Rett syndrome. *J Intellect Disabil Res*  
45 2016;60(2):182-90. doi: 10.1111/jir.12228  
46  
47 77. Motil KJ, Schultz RJ, Abrams S, et al. Fractional calcium absorption is increased in girls with Rett  
48 syndrome. *J Pediatr Gastroenterol Nutr* 2006;42(4):419-26. doi:  
49 10.1097/01.mpg.0000189370.22288.0c  
50  
51 78. Motil KJ, Ellis KJ, Barrish JO, et al. Bone mineral content and bone mineral density are lower in  
52 older than in younger females with Rett syndrome. *Pediatr Res* 2008;64(4):435-9. doi:  
53 10.1203/PDR.0b013e318180ebcd  
54  
55 79. Motil KJ, Barrish JO, Neul JL, et al. Low bone mineral mass is associated with decreased bone  
56 formation and diet in girls with Rett syndrome. *J Pediatr Gastroenterol Nutr* 2014;59(3):386-92.  
57 doi: 10.1097/MPG.0000000000000440 [published Online First: 2014/08/22]  
58  
59 80. Jefferson A, Leonard H, Siafarikas A, et al. Clinical Guidelines for Management of Bone Health in  
60 Rett Syndrome Based on Expert Consensus and Available Evidence. *PLoS One*  
2016;11(2):e0146824. doi: 10.1371/journal.pone.0146824  
61  
62 81. Motil KJ, Barrish JO, Lane J, et al. Vitamin D deficiency is prevalent in girls and women with Rett  
63 syndrome. *J Pediatr Gastroenterol Nutr* 2011;53(5):569-74.  
64  
65 82. Buchanan CB, Stallworth JL, Scott AE, et al. Behavioral profiles in Rett syndrome: Data from the  
66 natural history study. *Brain Dev* 2019;41(2):123-34. doi: 10.1016/j.braindev.2018.08.008  
67  
68 83. Lotan M, Merrick J, Kandel I, et al. Aging in persons with Rett syndrome: an updated review.  
69 *ScientificWorldJournal* 2010;10:778-87. doi: 10.1100/tsw.2010.79  
70  
71 84. Katz DM, Bird A, Coenraads M, et al. Rett Syndrome: Crossing the Threshold to Clinical Translation.  
72 *Trends Neurosci* 2016;39(2):100-13. doi: 10.1016/j.tins.2015.12.008

- 1  
2  
3 85. Erlandson A, Samuelsson L, Hagberg B, et al. Multiplex ligation-dependent probe amplification  
4 (MLPA) detects large deletions in the MECP2 gene of Swedish Rett syndrome patients. *Genet*  
5 *Test* 2003;7(4):329-32. doi: 10.1089/109065703322783707 [published Online First: 2004/03/06]  
6  
7 86. Gill H, Cheadle JP, Maynard J, et al. Mutation analysis in the MECP2 gene and genetic counselling  
8 for Rett syndrome. *J Med Genet* 2003;40(5):380-4. doi: 10.1136/jmg.40.5.380 [published Online  
9 First: 2003/05/15]  
10  
11 87. Temudo T, Ramos E, Dias K, et al. Movement disorders in Rett syndrome: an analysis of 60 patients  
12 with detected MECP2 mutation and correlation with mutation type. *Mov Disord*  
13 2008;23(10):1384-90. doi: 10.1002/mds.22115  
14  
15 88. Temudo T, Oliveira P, Santos M, et al. Stereotypies in Rett syndrome: analysis of 83 patients with and  
16 without detected MECP2 mutations. *Neurology* 2007;68(15):1183-7. doi:  
17 10.1212/01.wnl.0000259086.34769.78  
18  
19 89. Hagberg B. Clinical manifestations and stages of Rett syndrome. *Ment Retard Dev Disabil Res Rev*  
20 2002;8(2):61-5. doi: 10.1002/mrdd.10020 [published Online First: 2002/07/12]  
21  
22 90. Symons FJ, Byiers B, Hoch J, et al. Infrared Thermal Analysis and Individual Differences in Skin  
23 Temperature Asymmetry in Rett Syndrome. *Pediatr Neurol* 2015;53(2):169-72. doi:  
24 10.1016/j.pediatrneurol.2015.03.018 [published Online First: 2015/05/25]  
25  
26 91. Kerr AM, Julu PO. Recent insights into hyperventilation from the study of Rett syndrome. *Arch Dis*  
27 *Child* 1999;80(4):384-7. doi: 10.1136/adc.80.4.384 [published Online First: 1999/03/23]  
28  
29 92. Krajnc N. Severe respiratory dysrhythmia in Rett syndrome treated with topiramate. *J Child Neurol*  
30 2014;29(10):NP118-21. doi: 10.1177/0883073813508313  
31  
32 93. Gokben S, Ardic UA, Serdaroglu G. Use of buspirone and fluoxetine for breathing problems in Rett  
33 syndrome. *Pediatr Neurol* 2012;46(3):192-4. doi: 10.1016/j.pediatrneurol.2011.12.003  
34  
35 94. Chu DI, Tasian GE, Copelovitch L. Pediatric Kidney Stones - Avoidance and Treatment. *Curr Treat*  
36 *Options Pediatr* 2016;2(2):104-11. doi: 10.1007/s40746-016-0046-8 [published Online First:  
37 2016/10/22]  
38  
39 95. Marchand V, Motil KJ, Nutrition NCo. Nutrition support for neurologically impaired children: a  
40 clinical report of the North American Society for Pediatric Gastroenterology, Hepatology, and  
41 Nutrition. *J Pediatr Gastroenterol Nutr* 2006;43(1):123-35. doi:  
42 10.1097/01.mpg.0000228124.93841.ea  
43  
44 96. Leonard H, Ravikumara M, Baikie G, et al. Assessment and management of nutrition and growth in  
45 Rett syndrome. *J Pediatr Gastroenterol Nutr* 2013;57(4):451-60. doi:  
46 10.1097/MPG.0b013e31829e0b65  
47  
48 97. . In: Ross AC, Taylor CL, Yaktine AL, et al., eds. Dietary Reference Intakes for Calcium and Vitamin  
49 D. Washington (DC)2011.  
50  
51 98. Cook S, Hooper V, Nasser R, et al. Effect of gastrostomy on growth in children with  
52 neurodevelopmental disabilities. *Can J Diet Pract Res* 2005;66(1):19-24. doi:  
53 10.3148/66.1.2005.19  
54  
55 99. Percy AK, Lee HS, Neul JL, et al. Profiling scoliosis in Rett syndrome. *Pediatr Res* 2010;67(4):435-  
56 39.  
57  
58 100. Killian JT, Lane JB, Lee HS, et al. Scoliosis in Rett Syndrome: Progression, Comorbidities, and  
59 Predictors. *Pediatr Neurol* 2017;70:20-25. doi: 10.1016/j.pediatrneurol.2017.01.032 [published  
60 Online First: 2017/03/30]  
101. Downs J, Bergman A, Carter P, et al. Guidelines for management of scoliosis in Rett syndrome  
patients based on expert consensus and clinical evidence. *Spine (Phila Pa 1976)*  
2009;34(17):E607-E17.  
102. Downs J, Torode I, Wong K, et al. Surgical fusion of early onset severe scoliosis increases survival  
in Rett syndrome: a cohort study. *Dev Med Child Neurol* 2016;58(6):632-8. doi:  
10.1111/dmcn.12984 [published Online First: 2015/12/15]  
103. Tay G, Graham H, Graham HK, et al. Hip displacement and scoliosis in Rett syndrome - screening is  
required. *Dev Med Child Neurol* 2010;52(1):93-8. doi: 10.1111/j.1469-8749.2009.03359.x

- 1  
2  
3 104. Cass H, Reilly S, Owen L, et al. Findings from a multidisciplinary clinical case series of females  
4 with Rett syndrome. *Dev Med Child Neurol* 2003;45(5):325-37.  
5  
6 105. Hirano D, Taniguchi T. Skin injuries and joint contractures of the upper extremities in Rett  
7 syndrome. *J Intellect Disabil Res* 2018;62(1):53-59. doi: 10.1111/jir.12452 [published Online  
8 First: 2017/12/08]  
9  
10 106. Downs J, Bebbington A, Woodhead H, et al. Early determinants of fractures in Rett syndrome.  
11 *Pediatrics* 2008;121(3):540-6. doi: 10.1542/peds.2007-1641 [published Online First: 2008/03/04]  
12  
13 107. Jefferson AL, Woodhead HJ, Fyfe S, et al. Bone mineral content and density in Rett syndrome and  
14 their contributing factors. *Pediatr Res* 2011;69(4):293-8. doi: 10.1203/PDR.0b013e31820b937d  
15  
16 108. Freundlich K. Pressure Injuries in Medically Complex Children: A Review. *Children (Basel)*  
17 2017;4(4) doi: 10.3390/children4040025 [published Online First: 2017/04/08]  
18  
19 109. Stagi S, Cavalli L, Congiu L, et al. Thyroid function in Rett syndrome. *Horm Res Paediatr*  
20 2015;83(2):118-25. doi: 10.1159/000370066  
21  
22 110. Tauboll E, Sveberg L, Svalheim S. Interactions between hormones and epilepsy. *Seizure* 2015;28:3-  
23 11. doi: 10.1016/j.seizure.2015.02.012  
24  
25 111. Buchanan CB, Stallworth JL, Scott AE, et al. Behavioral profiles in Rett syndrome: Data from the  
26 natural history study. *Brain Dev* 2018 doi: 10.1016/j.braindev.2018.08.008 [published Online  
27 First: 2018/09/16]  
28  
29 112. Wong K, Leonard H, Jacoby P, et al. The trajectories of sleep disturbances in Rett syndrome. *J Sleep*  
30 *Res* 2015;24(2):223-33. doi: 10.1111/jsr.12240  
31  
32 113. Boban S, Leonard H, Wong K, et al. Sleep disturbances in Rett syndrome: Impact and management  
33 including use of sleep hygiene practices. *Am J Med Genet A* 2018;176(7):1569-77. doi:  
34 10.1002/ajmg.a.38829  
35  
36 114. Jan JE, Owens JA, Weiss MD, et al. Sleep hygiene for children with neurodevelopmental  
37 disabilities. *Pediatrics* 2008;122(6):1343-50. doi: 10.1542/peds.2007-3308  
38  
39 115. Dye TJ, Jain SV, Simakajornboon N. Outcomes of long-term iron supplementation in pediatric  
40 restless legs syndrome/periodic limb movement disorder (RLS/PLMD). *Sleep Med* 2017;32:213-  
41 19. doi: 10.1016/j.sleep.2016.01.008  
42  
43 116. Aurora RN, Zak RS, Karippot A, et al. Practice parameters for the respiratory indications for  
44 polysomnography in children. *Sleep* 2011;34(3):379-88. doi: 10.1093/sleep/34.3.379  
45  
46 117. Lai YYL, Wong K, King NM, et al. Oral health experiences of individuals with Rett syndrome: a  
47 retrospective study. *BMC Oral Health* 2018;18(1):195. doi: 10.1186/s12903-018-0651-y  
48 [published Online First: 2018/12/01]  
49  
50 118. Tarquinio DC, Hou W, Neul JL, et al. Age of diagnosis in Rett syndrome: patterns of recognition  
51 among diagnosticians and risk factors for late diagnosis. *Pediatr Neurol* 2015;52(6):585-91 e2.  
52 doi: 10.1016/j.pediatrneurol.2015.02.007  
53  
54 119. Lane JB, Lee HS, Smith LW, et al. Clinical severity and quality of life in children and adolescents  
55 with Rett syndrome. *Neurology* 2011;77(20):1812-18.  
56  
57 120. Mori Y, Downs J, Wong K, et al. Longitudinal effects of caregiving on parental well-being: the  
58 example of Rett syndrome, a severe neurological disorder. *Eur Child Adolesc Psychiatry*  
59 2019;28(4):505-20. doi: 10.1007/s00787-018-1214-0 [published Online First: 2018/08/29]  
60

1  
2  
3  
4  
5  
6  
7  
8  
9  
10  
11  
12  
13  
14  
15  
16  
17  
18  
19  
20  
21  
22  
23  
24  
25  
26  
27  
28  
29  
30  
31  
32  
33  
34  
35  
36  
37  
38  
39  
40  
41  
42  
43  
44  
45  
46  
47  
48  
49  
50  
51  
52  
53  
54  
55  
56  
57  
58  
59  
60

**Supplementary Table 1. Health supervision goals surrounding individuals with RTT by ICF contextual factors**

|                              | Early Childhood                                                                                                                                                                                                                                                                                             | Late Childhood                                                                                                                                                                                                                                                                                                                                               | Post-puberty                                                                                                                                                                                                                                                                                                                                                                | Ad                                                                                           |
|------------------------------|-------------------------------------------------------------------------------------------------------------------------------------------------------------------------------------------------------------------------------------------------------------------------------------------------------------|--------------------------------------------------------------------------------------------------------------------------------------------------------------------------------------------------------------------------------------------------------------------------------------------------------------------------------------------------------------|-----------------------------------------------------------------------------------------------------------------------------------------------------------------------------------------------------------------------------------------------------------------------------------------------------------------------------------------------------------------------------|----------------------------------------------------------------------------------------------|
| Body Functions and Structure | GI/Nutrition: Maintain adequate growth, bone health, and nutrition; manage reflux and constipation<br>Neurological: Identify and manage epilepsy when present; identify and manage autonomic dysfunction<br>Rehabilitation: develop strength and coordination<br>Cardiology: detect and manage prolonged QT | GI/Nutrition: Maintain adequate growth, bone health, and nutrition; manage reflux and constipation<br>Neurological: Identify and manage epilepsy when present; identify and manage autonomic dysfunction<br>Rehabilitation: regulate tone and prevent contractures<br>Cardiology: detect and manage prolonged QT<br>Orthopedics: detect and manage scoliosis | GI/Nutrition: Maintain nutrition and bone health; manage constipation; detect and manage gall bladder dysfunction<br>Neurological: Identify and manage epilepsy when present; identify and manage autonomic dysfunction<br>Rehabilitation: regulate tone and prevent contractures<br>Cardiology: detect and manage prolonged QT<br>Orthopedics detect and prevent fractures | GI<br>nut<br>ma<br>an<br>dys<br>Ne<br>ma<br>pre<br>aut<br>Re<br>an<br>Ca<br>pro<br>Or<br>pre |
| Environment                  | Education: Develop appropriate IEP<br>Therapies: Access to appropriate therapies<br>Socialization: Age-appropriate interactions and activities                                                                                                                                                              | Education: Develop appropriate IEP<br>Therapies: Access to appropriate therapies including physical, occupational, and assistive communication technologies<br>Socialization: Age-appropriate interactions and activities                                                                                                                                    | Education: Develop appropriate IEP<br>Therapies: Access to appropriate therapies including physical, occupational, and assistive communication technologies<br>Socialization: Age-appropriate interactions and activities                                                                                                                                                   | Ed<br>Da<br>Th<br>app<br>phy<br>ass<br>tec<br>So<br>app<br>act                               |

## **Consensus guidelines on managing Rett Syndrome across the lifespan** ~~Guidance for Health~~

### **Professionals in Rett Syndrome**

Cary Fu MD<sup>a</sup>, Dallas Armstrong MD<sup>b</sup>, Eric D. Marsh MD PhD<sup>b</sup>, David N. Lieberman MD PhD<sup>c</sup>, Kathleen J. Motil MD PhD<sup>d</sup>, Rochelle Witt MD PhD<sup>e</sup>, Shannon Standridge DO MPH<sup>e</sup>, Paige Nues<sup>f</sup>, Jane Lane RN BSN<sup>g</sup>, Tristen Dinkel CNRN CPN RN BSN<sup>h</sup>, Monica Coenraads<sup>i</sup>, Jana von Hehn PhD<sup>i</sup>, Mary Jones MD MPH<sup>j</sup>, Katie Hale RN MS PNP<sup>j</sup>, Bernhard Suter MD<sup>k</sup>, Daniel G. Glaze MD<sup>k</sup>, Jeffrey L. Neul MD PhD<sup>l</sup>, Alan Percy, MD<sup>g,m</sup>, Tim A. Benke, MD PhD<sup>h,n</sup>

#### **Affiliations:**

<sup>a</sup>Department of Pediatrics and Neurology, Vanderbilt University Medical Center, Nashville, TN;

<sup>b</sup>Division of Neurology, Children's Hospital of Philadelphia and the Department of Neurology, Perelman

School of Medicine at the University of Pennsylvania, Philadelphia PA; <sup>c</sup>Department of Neurology,

Boston Children's Hospital; <sup>d</sup>Baylor College of Medicine, Department of Pediatrics, USDA/ARS

Children's Nutrition Research Center, Houston, TX; <sup>e</sup>Department of Pediatrics, University of Cincinnati

College of Medicine, Cincinnati, OH and Division of Neurology, Cincinnati Children's Hospital Medical

Center, Cincinnati, OH; <sup>f</sup>International Rett Syndrome Foundation; <sup>g</sup>University of Alabama at

Birmingham, School of Medicine, Civitan International Research Center, Birmingham, AL; <sup>h</sup>Children's

Hospital Colorado, Department of Neurology, Aurora, CO; <sup>i</sup>Rett Syndrome Research Trust; <sup>j</sup>UCSF

Benioff Children's Hospital Oakland, Department of Pediatric Medicine, Oakland, CA; <sup>k</sup>Baylor College

of Medicine, Departments of Pediatrics and Neurology and Texas Children's Hospital, Houston, TX;

<sup>l</sup>Vanderbilt Kennedy Center, Vanderbilt University Medical Center, Department of Pediatrics,

Pharmacology, and Special Education, Nashville, TN; <sup>m</sup>University of Alabama at Birmingham, School of

Medicine, Department of Pediatrics, Neurology, Neurobiology, Genetics, and Psychology, Birmingham,

AL; <sup>n</sup>University of Colorado School of Medicine, Departments of Pediatrics, Pharmacology, Neurology,

and Otolaryngology, and Children's Hospital Colorado, Department of Neurology, Aurora, CO.

**Corresponding author:** Tim A. Benke, MD PhD

Address: Children's Hospital Colorado, 13123 E 16<sup>th</sup>, Box B155/Neurology, Aurora, CO 80045, USA

Telephone: 303 724 3568

Email: tim.benke@cuanschutz.edu

**Short title:** Health guidance for Rett Syndrome

**Word Count:**

**Abstract: 182/300**

**Introduction: 592**

**Methods: 479**

**Results: 811**

**Discussion: 559**

**Total: 2441/2500**

**Tables: 7**

**Figures: 0**

**References: 120**

**Supplementary Tables: 1**



**Key words:** Rett syndrome, MECP2, primary care guidelines

**Funding Statement:** Cary Fu: International Rett Syndrome Foundation; Dallas Armstrong: Rett Syndrome Research Trust; Eric D. Marsh: NIH U54 HD061222, Rett Syndrome Research Trust; Rochelle M. Witt: Rett Syndrome Research Trust; David N. Lieberman: Rett Syndrome Research Trust, NIH U54 HD061222; Jane Lane: NIH U54 HD061222, Rett Syndrome Research Trust, International Rett Syndrome Foundation; Paige Nues: International Rett Syndrome Foundation; Kathleen J. Motil: International Rett Syndrome Foundation; Bernhard Suter: Blue Bird Circle, NIH U54 HD061222; Daniel G. Glaze: Blue Bird Circle, NIH U54 HD061222; Jeffery L. Neul: NIH U54 HD061222, U54 HD461222, Rett Syndrome Research Trust; Alan K. Percy: NIH U54 HD061222, Rett Syndrome Research Trust; Tim A. Benke: International Rett Syndrome Foundation, Rett Syndrome Research Trust, NIH U54 HD061222, Children's Hospital Colorado Foundation Ponzio Family Chair in Neurology Research.

**Competing Interest Statement:** Eric D. Marsh: Funding from the NIH and International Rett Syndrome Foundation; clinical trials with GW Pharmaceuticals, Zogenix, Marinus; Consultancy to Stoke therapeutics. David N. Lieberman: Consultancy for AveXis, clinical trials with Acadia, Anavex, GW Pharmaceuticals,. Shannon Standridge: Speaker Bureau for GW Pharmaceuticals. Bernhard Suter: Funding from the NIH and Blue Bird Circle; clinical trials with Acadia. Daniel G. Glaze: Funding from the NIH and Blue Bird Circle; clinical trials with GW Pharmaceuticals, Acadia, Anavex, Newron; Consultancy for Acadia and Trend Community Pharmaceuticals. Jeffery L. Neul: Funding from the NIH; Consultancy with Acadia, AveXis, Biohaven, GW Pharmaceuticals, Kurro, Neuren, Newron, Ovid, Takeda, and Teva. Jane Lane: Funding from NIH; Consultancy from International Rett Syndrome Foundation and GW Pharmaceuticals. Alan K. Percy: Funding from the NIH; Consultancy for Anavex, AveXis, Acadia, and GW Pharmaceuticals; Clinical Trials with Anavex, Acadia, GW Pharmaceuticals, and RSRT; Tim A. Benke: Funding from the NIH, International Foundation for CDKL5 Research, and Loulou Foundation. Consultancy for AveXis, Ovid, GW Pharmaceuticals, International Rett Syndrome Foundation, Takeda, and Marinus; Clinical Trials with Acadia, Ovid, GW Pharmaceuticals, Marinus and RSRT; All remuneration has been made to his department. The other authors have indicated they have no financial relationships relevant to this article to disclose.

**Abbreviations:**

ABR: auditory brainstem response

AAC: augmentative and alternative communication

CVI: cortical visual impairment

EI: Early Intervention

ICF: International Classification of Functioning, Disability and Health

IEP: Individualized Education Program (or Plan)

NHS: NIH-funded Natural History Study of Rett and related disorders

PCP: primary care provider

RTT: Rett Syndrome

TVI: teacher of the visually impaired

**Summary Box:**

**What is known:** Rett syndrome (RTT) is a multi-system and rare genetic disorder with similarities to other developmental encephalopathies. There are no peer-reviewed consensus-based therapeutic guidance to care in RTT.

**What this study adds:** Primary care providers and other health professionals caring for patients with RTT frequently have limited first-hand experience managing the disorder due to its rare prevalence. A consensus on guidance for health professionals caring for patients with RTT was developed based on literature review and expert opinion. This guidance is applicable to other rare and often severe neurodevelopmental disorders.



## Abstract

Background: Rett syndrome (RTT) is a severe neurodevelopmental disorder with complex medical co-morbidities extending beyond the nervous system requiring the attention of health professionals. There are no peer-reviewed consensus-based therapeutic guidance to care in RTT. The objective was to provide consensus on guidance of best practice for addressing these concerns.

Methods: Informed by the literature and using a modified Delphi approach, a consensus process was utilized to develop guidance for care in RTT by health professionals.

Results: Typical RTT presents early in childhood in a clinically recognizable fashion. Multisystem co-morbidities evolve throughout the lifespan requiring coordination of care between primary care and often multiple subspecialty providers. To assist health professionals and families in seeking best practice, a checklist and detailed references for guidance were developed by consensus.

Conclusions: The overall multisystem issues of RTT require primary care providers and other health professionals to manage complex medical co-morbidities within the context of the whole individual and family. Given the median life expectancy well into the 6<sup>th</sup> decade, guidance is provided to health professionals to achieve current best possible outcomes for these special-needs individuals.

## Introduction

Rett syndrome (RTT)<sup>1</sup> is a severe neurodevelopmental disorder with an estimated worldwide prevalence of between 1 in 20,000 to 40,000 people. RTT is one of the most common genetic causes of developmental and intellectual impairment in females<sup>2</sup>, affecting up to 1 in 10,000 girls under the age of 12. RTT is not a neurodegenerative condition<sup>3</sup>, rather it is a progressive disorder involving multisystem symptom evolution over time. Following demonstration of symptom reversal in mouse models<sup>4 5</sup>, there is flourishing hope for further disease modifying therapies.

Nearly all individuals with RTT have one of >300 distinct loss-of-function mutations in the *MECP2* gene on the X-chromosome<sup>6</sup>. This gene encodes methyl-CpG binding protein-2, an essential transcriptional regulator in the brain required for normal neurodevelopment<sup>7</sup>. Complete genetic testing involves sequencing and methods to detect larger deletions (e.g. multiplex ligation-dependent probe amplification (MLPA)) of the *MECP2* gene. Likely owing to the random nature of X-chromosome inactivation<sup>8</sup> and other genetic modifiers<sup>9-11</sup>, genotype-phenotype correlations are imprecise. However, a general pattern exists with some mutations (early truncating mutations such as R168X, R255X, R270X, large deletions and specific point mutations such as R106W) associated with increased severity compared to other mutation groups (R133C, R294X, R306X, and C-terminal truncations)<sup>12</sup>. *MECP2* mutations causing RTT are almost always *de novo* (spontaneous) and as such are not expected to recur in families.

The presentation is initially subtle in the first two years of life involving developmental delays and hypotonia on exam, but subsequent symptom evolution between 18-30 months of age with developmental regression and onset of repetitive, purposeless hand movements is striking<sup>13</sup>. The core clinical diagnostic features of RTT (Table 1, Typical and Atypical)<sup>1</sup> include a period of normal (or near normal) development followed by developmental regression with loss of language and hand function skills, impaired gait, and development of hand stereotypies causing life-long dependence<sup>14 15</sup>. The average age at RTT diagnosis of 2.5 years has been trending downward with increasing availability of diagnostic genetic testing<sup>16</sup>. The multisystem nature of the disorder has been documented within multiple observational studies with symptom risk evolving across the lifespan.

1  
2  
3 *MECP2* mutations have been identified rarely in males with neurodevelopmental disorders,  
4  
5 termed “male RTT encephalopathy”. The resulting developmental outcome is quite variable though with  
6  
7 symptomatology distinct from RTT and ranges in severity from a severe neonatal encephalopathy with  
8  
9 minimal developmental improvement to a mild intellectual disability<sup>17</sup>. Male RTT encephalopathy<sup>18</sup> and  
10  
11 other distinct developmental encephalopathies (historically linked to RTT)<sup>19</sup> such as *MECP2* duplication  
12  
13 syndrome<sup>20-22</sup>, *CDKL5* Deficiency Disorder<sup>23-26</sup> and *FOXG1* syndrome<sup>27-30</sup> may have similar approaches  
14  
15 (but distinct therapeutics) as more is learned about specific aspects of their clinical care. Alterations in  
16  
17 *MECP2*, *CDKL5* and *FOXG1* should be considered in all individuals, male and female, with  
18  
19 developmental delays and intellectual disability.  
20  
21

22 In the past two decades the natural history of RTT has been extensively studied<sup>31</sup>. Perhaps most  
23  
24 important to all health professionals managing this complex disorder is the knowledge that with  
25  
26 appropriate care, children with RTT will become adults with RTT; 70% live to at least 50 years of age<sup>14</sup>  
27  
28 <sup>32</sup>. As such, health professionals are often presented with the daunting task of effectively managing the  
29  
30 evolving medical comorbidities of the disorder throughout a patient’s lifespan. To help address this  
31  
32 challenge, based on a review of published literature regarding RTT symptomatology that identified the  
33  
34 most relevant primary care concerns through a modified Delphi consensus approach, we developed  
35  
36 recommendations regarding guidance for best practice. These recommendations have been organized  
37  
38 based on an age-dependent health supervision approach to facilitate the goal of effective and meaningful  
39  
40 care for individuals with RTT across all ages.  
41  
42  
43  
44

## 45 **Methods**

46  
47 Draft guidance was developed (MJ, KH and PN) and presented and discussed at bimonthly  
48  
49 International Rett Syndrome Foundation sponsored North American Rett Syndrome Clinics Network  
50  
51 conference calls between January 2016 through September 2018 with input obtained from 22 clinical  
52  
53 sites. An initial draft was presented January 2017 for external review by the Network through September  
54  
55 2018; additional public input was obtained from January 2019 to May 2019 through placement on the  
56  
57  
58  
59  
60

1  
2  
3 RettSyndrome.org website. With supervision by the group leader, the guidance was further refined  
4 substantially by eight Rett Centers (University of Alabama Birmingham, Vanderbilt University,  
5 Children's Hospital Colorado, Children's Hospital of Philadelphia, Cincinnati Children's Hospital,  
6 Boston Children's Hospital, UCSF Benioff Children's Hospital Oakland, and Texas Children's Hospital)  
7 providing multidisciplinary care for individuals with RTT, in partnership with the NIH-funded Natural  
8 History Study of Rett and related disorders (NHS, U54 HD061222; **ClinicalTrials.gov:**  
9 **NCT00299312/NCT02738281**) and two patient advocacy groups, Rett Syndrome Research Trust and the  
10 International Rett Syndrome Foundation. This consensus approach followed a modified Delphi process  
11 employed by members of this group previously<sup>33</sup>. The partners were chosen based on clinical experience  
12 across primary care, multiple subspecialties, health care delivery, and, importantly, patient-family  
13 experience with RTT. Conflicts of interest were vetted by the group leader with full knowledge by the  
14 group. A consensus led by the group leader surrounding relevant guidance based on published data and  
15 clinical opinion was developed through six further rounds of modifications. The results of a **systematic**  
16 **literature** review were used to inform the guidance (**Fu et al, in preparation paper submitted**). The  
17 following recommendations were created based on an age-dependent health supervision approach to assist  
18 health professionals in fulfilling the goal of effective and meaningful care for individuals with RTT across  
19 all ages (Tables 2 and 3). Items are organized by prevalence at each age group. Consistent with  
20 International Classification of Functioning, Disability and Health (ICF) guidelines (WHO, 2001)<sup>34</sup>, this  
21 guidance recognizes the inter-relatedness of body function/structure, environment and personal factors to  
22 maximize activities and participation (Supplemental Table 1). Thus, in addition to routine assessment of  
23 medical issues (body function), several psychosocial, environmental, and educational concerns need to be  
24 assessed frequently to achieve the goal of family-centered service:

- 25 • The financial, emotional and physical impact on the family as a whole: sibling well-being, parent  
26 physical and mental health (sleep, grief, anxiety, depression), quality of life, and marital impacts<sup>35 36</sup>.
- 27 • Vigilance regarding signs and symptoms of abuse and neglect of an at-risk individual.
- 28 • Educational support programs for which the individual may be eligible.

- Government-sponsored income and other support benefits.
- Personal financial, community, and emotional support available to the family.

### **Patient involvement**

Patients family groups (International Rett Syndrome Foundation and Rett Syndrome Research Trust), represented by parents of individuals with RTT (Ms. Nues and Ms. Coenraads), were involved in the development of the patient care guidance and writing of this manuscript. Their organizations will assist with dissemination of the guidance.

### **Results**

The guidance was formulated into a checklist (Table 2) with further details and references (Tables 3-7) that informed the checklist and the consensus process. The guidance for management by health professionals was grouped by relevant features and therapeutic approaches at different ages. The checklist (Table 2) is suitable for use by health professionals as well as the family as part of their health care records with Tables 3-7 providing further detailed guidance.

*Diagnosis to 5 years old--Early Childhood:* Most features of RTT may emerge during this age period. Feeding difficulties and growth failure<sup>37-39</sup> begin during this age. Additional treatable gastrointestinal issues including dysmotility, gastroesophageal reflux, constipation, gas bloating, often presenting as irritability or apparent discomfort manifest commonly at this age<sup>37 40</sup>. The development of microcephaly or head growth stagnation (as early as 1.5 months)<sup>39</sup> is a common feature, though macrocephaly has also been seen<sup>41</sup>. Tone issues at this age are typically characterized by hypotonia<sup>42</sup>; early referral to therapists (physical, occupational, speech language including augmentative communication<sup>43</sup>) and establishment of an IEP<sup>44</sup> are necessary. Severe hearing loss is uncommon in RTT<sup>45</sup> but there may be delayed auditory processing<sup>46 47</sup> that mimics hearing impairment. There is increased risk of cortical visual impairment (CVI) and ocular apraxia in RTT<sup>48</sup>. There is evidence suggesting increased risk for prolonged QTc interval that may be present from a young age<sup>49-51</sup> and may develop with time<sup>52</sup>. The frequency of epileptic and non-epileptic spells<sup>53 54</sup> wax and wane throughout the

1  
2  
3 course<sup>53 55</sup>. Individuals with RTT generally respond to anticonvulsants<sup>53 55 56</sup> but there have been no  
4  
5 randomized, controlled trials of specific anticonvulsants for RTT. If hospitalized, it is important to  
6  
7 inform hospital staff of important issues in RTT individuals that could potentially confound or complicate  
8  
9 care. This includes a heightened sensitivity to the effects of anesthetics, potentially requiring lower doses  
10  
11 of anesthetic medications to achieve sedation<sup>57 58</sup> or longer time to awaken from general anesthesia<sup>59</sup>.  
12  
13 Though response to pain is altered in RTT<sup>60</sup>, the approach to analgesia should not be altered. Hospital  
14  
15 staff should also be aware of cold extremities<sup>61</sup>, irregular and disordered breathing with oxygen  
16  
17 desaturations<sup>62 63</sup>, impaired proprioception, lack of hand use, inability to change position, and increased  
18  
19 fall risk.  
20  
21

22 *5 years to the Pre-pubescent Stage--Late Childhood:* During the early school years, children with  
23  
24 RTT typically have stabilized developmentally; the regression phase has ended<sup>39</sup>. Overall, many of the  
25  
26 multisystem issues that arose during the first 5 years of life persist. Preventing undernutrition and  
27  
28 maintaining a healthy BMI is important, as this has been associated with better functioning<sup>38 64</sup>.  
29  
30 Surveillance for scoliosis becomes an important preventive measure; some children (~20%) ultimately  
31  
32 require spinal surgery for this comorbidity<sup>65</sup>. Longitudinal assessment of pubertal development indicates  
33  
34 an increased prevalence of early thelarche and adrenarche but delayed menarche<sup>66</sup>. Difficulties with  
35  
36 abnormal tone in this age range typically are characterized by hypotonia evolving to rigidity<sup>67 68</sup>.  
37  
38

39 *Post-puberty to the end of school (~21 years old)--Post-puberty:* Surveillance for scoliosis  
40  
41 continues to be an important preventive measure though this lessens with completion of puberty<sup>66</sup>.  
42  
43 Surveillance for urinary retention is important<sup>69 70</sup>. Biliary tract disease is seen in young adulthood at  
44  
45 rates similar to the general population but due to communication impairment in RTT the presenting  
46  
47 symptoms may be limited to irritability, weight loss and vomiting<sup>71 72</sup>. Studies of longevity in RTT  
48  
49 demonstrate survival of many into middle age, underscoring the need for the early development of a  
50  
51 comprehensive, thoughtful plan for transitioning to adulthood<sup>73</sup>. Longitudinal supervision is required in  
52  
53 RTT as physical, behavioral and cognitive limitations will not allow for independent living<sup>14 15</sup>. This may  
54  
55 include day programs and respite care.  
56  
57  
58  
59  
60

1  
2  
3  
4  
5  
6  
7  
8  
9  
10  
11  
12  
13  
14  
15  
16  
17  
18  
19  
20  
21  
22  
23  
24  
25  
26  
27  
28  
29  
30  
31  
32  
33  
34  
35  
36  
37  
38  
39  
40  
41  
42  
43  
44  
45  
46  
47  
48  
49  
50  
51  
52  
53  
54  
55  
56  
57  
58  
59  
60

*21 years and older--Adulthood:* Overall, individuals with RTT tend to stabilize clinically in young adulthood<sup>74-76</sup>. Frequent causes of hospitalization for women with RTT include pneumonia, respiratory distress, status epilepticus, rectal bleeding, decline in ambulation, or refusal/inability to eat or drink<sup>15</sup>. While one-third of individuals may have a gastrostomy tube, half of these continue to have some oral intake<sup>32</sup>. With age, concern for low bone mineral mass coupled with long-term use of particular anticonvulsants, raises the risks for osteoporosis and bone fractures<sup>77-79</sup> necessitating continued supplementation and monitoring of 25-OH Vitamin D status<sup>80 81</sup>. Musculoskeletal problems and gross motor function may worsen overall<sup>75</sup> possibly due to more parkinsonian features<sup>67</sup> but with overall preservation of intellect and memory<sup>15</sup>; additional study is needed due to relatively low numbers studied. Physical limitations, parkinsonian features, and high prevalence of social withdrawal behaviors lead to abnormal or decreased social interactions consistent with anxiety or depression<sup>82</sup>. Although the majority of women with RTT in the US live at home<sup>14</sup>, in other countries only about one-third of women over age 16 with RTT live at home (either full or part-time) with the majority living in a residential facility<sup>15</sup>. Long-term and individually-tailored care that provides social interactions and physical activity should be provided at all ages to reduce age-related deterioration<sup>83</sup>.

## Discussion

Management of RTT requires input or expertise related to multiple specialties, often necessitating referrals to many providers in addition to the primary care provider. The above health guidance will evolve with further research into the longitudinal course of RTT by the NHS and others. However, there are limitations to the current proposed health guidance, specifically with respect to the lack of needed randomized clinical trials in a rare condition where interventions, such as physical and other therapies, are rarely standardized. While evaluation of annual ECG for prolonged QT appears supported by the literature<sup>49-52</sup>, the impact and outcomes of such surveillance need further study. At this time, longitudinal prognostic details are not well understood in certain areas of evaluation such as affect, displayed emotion and its meaning, the most appropriate manner to assess intelligence and how it evolves, or the life span of

10



1  
2  
3 gynecologic concerns. Additional studies should also address the role and utility of palliative care and  
4 banking of post-mortem tissue. From this breadth of information, quality metrics with benchmarks can be  
5 defined to ensure standards of care with best outcomes for individuals with RTT.  
6  
7

8  
9 With the relative paucity of older individuals in the NHS and related studies, further study into  
10 the care of older individuals is needed to better address guidance more extensively for both older RTT  
11 women and for those more severely affected who are not routinely captured in most studies<sup>76</sup>.  
12  
13 Additionally, with current and future clinical trials, the disease course for individuals with RTT may be  
14 more modifiable with severity of symptoms and disease progression very different from our current  
15 understanding. There is considerable ongoing research in the field of specific RTT therapeutics<sup>84</sup>. It is  
16 therefore important for families, caregivers and health professionals to reach out to Rett Centers and  
17 family support group resources to stay up to date on clinical trials, drug approvals, and how this impacts  
18 these current care guidance. While a primary care provider may not be able to counsel on the suitability  
19 of different clinical trials, actively engaging RTT individuals and families and referring to clinical trials at  
20 specialty centers is necessary for the development of improved therapeutics.  
21  
22

23  
24 With the advances in healthcare and technology, improved and earlier genetic testing, robust  
25 research in RTT, and active patient advocacy from families and clinicians, individuals with RTT are  
26 surviving well into adulthood while living more healthy and meaningful lives. With the vast amount of  
27 medical knowledge emerging from research in RTT today and knowing the complexity of care RTT often  
28 requires, this proposed guidance can facilitate delivery of more thorough and well-rounded management  
29 and comprehensive surveillance by primary care providers and other health professionals caring for  
30 individuals with RTT. Importantly, the guidance also helps to outline considerations in which health  
31 professionals may want to refer the individual with RTT for more specialized management.  
32  
33

34  
35 In conclusion, Rett syndrome is a medically complex neurodevelopmental disorder impacting  
36 multiple organ systems in an evolving fashion from childhood through the 6<sup>th</sup> decade of adulthood.  
37  
38 Primary care providers and other health professionals tasked with coordinating care play an essential role  
39 in ensuring the long-term health and well-being of these individuals through effective screening practices,  
40  
41  
42  
43  
44  
45  
46  
47  
48  
49  
50  
51  
52  
53  
54  
55  
56  
57  
58  
59  
60

1  
2  
3 active management, and thoughtful coordination of subspecialty requirements. The accumulating  
4  
5 knowledge regarding the natural history of RTT serves as a vital resource to help providers anticipate the  
6  
7 complexities of this disorder.  
8  
9

### 10 11 12 13 **Web-links to regional RTT clinics for health professionals**

14  
15 <https://www.rettsyndrome.org/about-rett-syndrome/clinics>

16  
17 <https://reverserett.org/newly-diagnosed/#clinics-map>

18  
19  
20 <https://www.rettsyndrome.eu/>

### 21 22 23 **Useful web-links for families**

24  
25 <https://www.rettsyndrome.org/>

26  
27 <https://reverserett.org/>

28  
29 <https://www.rettsyndrome.org/for-families/resources-for-families>

30  
31  
32 <https://www.rettsyndrome.eu/>

33  
34  
35 **Contribution Statement:** Ms. Nues, Drs. Marsh, Jones, Neul, Percy and Benke conceptualized and  
36 designed the literature search and guidance. Ms. Nues and Dr. Jones initiated a first draft of Tables 2 and  
37 3. Drs. Fu, Armstrong, Lieberman, Marsh and Witt initiated the search and a first draft of the guidance.  
38 All authors participated in the consensus process in developing the guidance as described. Dr. Benke, as  
39 group leader, supervised and moderated the consensus process, initial drafts of the manuscript, the overall  
40 collation of the tables, manuscript, and guidance. All authors approved the final manuscript as submitted  
41 and agree to be accountable for all aspects of the work.  
42  
43

### 44 **Acknowledgements:**

45 We sincerely thank all of the individuals and families that have participated in this research. Thanks to Dr.  
46 Walter Kaufmann for comments on a later stage of this manuscript.  
47  
48  
49  
50  
51  
52  
53  
54  
55  
56  
57  
58  
59  
60

|    |                                                                                               |
|----|-----------------------------------------------------------------------------------------------|
| 1  |                                                                                               |
| 2  |                                                                                               |
| 3  |                                                                                               |
| 4  | Table 1. Classic (or Typical RTT) and Atypical RTT diagnostic criteria <sup>1</sup> .         |
| 5  | <b>Classic or Typical RTT diagnostic criteria</b>                                             |
| 6  | A period of regression followed by recovery or stabilization                                  |
| 7  | 1. Partial or complete loss of acquired purposeful hand skills                                |
| 8  | 2. Partial or complete loss of spoken language                                                |
| 9  | 3. Gait abnormalities: impaired or absence of ability                                         |
| 10 | 4. Stereotypic hand movements such as hand wringing/squeezing, clapping/tapping, mouthing and |
| 11 | washing/rubbing automatisms.                                                                  |
| 12 | <b>Atypical RTT diagnostic criteria</b>                                                       |
| 13 | A period of regression followed by recovery or stabilization                                  |
| 14 | 1. At least 2 of the 4 main criteria                                                          |
| 15 | 2. 5 of 11 supportive criteria                                                                |
| 16 | a) Breathing disturbances while awake                                                         |
| 17 | b) Bruxism while awake                                                                        |
| 18 | c) Impaired sleep                                                                             |
| 19 | d) Abnormal muscle tone                                                                       |
| 20 | e) Peripheral vasomotor disturbances                                                          |
| 21 | f) Scoliosis/kyphosis                                                                         |
| 22 | g) Growth retardation                                                                         |
| 23 | h) Small cold hands and feet                                                                  |
| 24 | i) Inappropriate laughing/screaming spells                                                    |
| 25 | j) Diminished response to pain                                                                |
| 26 | k) Intense eye communication – “eye pointing”                                                 |
| 27 |                                                                                               |
| 28 |                                                                                               |
| 29 |                                                                                               |
| 30 |                                                                                               |
| 31 |                                                                                               |
| 32 |                                                                                               |
| 33 |                                                                                               |
| 34 |                                                                                               |
| 35 |                                                                                               |
| 36 |                                                                                               |
| 37 |                                                                                               |
| 38 |                                                                                               |
| 39 |                                                                                               |
| 40 |                                                                                               |
| 41 |                                                                                               |
| 42 |                                                                                               |
| 43 |                                                                                               |
| 44 |                                                                                               |
| 45 |                                                                                               |
| 46 |                                                                                               |
| 47 |                                                                                               |
| 48 |                                                                                               |
| 49 |                                                                                               |
| 50 |                                                                                               |
| 51 |                                                                                               |
| 52 |                                                                                               |
| 53 |                                                                                               |
| 54 |                                                                                               |
| 55 |                                                                                               |
| 56 |                                                                                               |
| 57 |                                                                                               |
| 58 |                                                                                               |
| 59 |                                                                                               |
| 60 |                                                                                               |

**Table 2.** Health Supervision guidance as a checklist for individuals and PCP.

| <ul style="list-style-type: none"> <li>• <b>Individuals with Rett syndrome should be seen for regular wellness checkups, screenings and immunizations (especially influenza vaccinations)*.</b></li> <li>• <b>Inform staff that extra time will be needed for visit, especially to inspecting the individual without braces, shoes and outer clothing.</b></li> <li>• <b>Parents and care-givers should keep a binder of health records to include: genetic testing results, summaries of all doctor visits (including specialist referrals), summaries of hospital admissions, laboratory studies, ECG, x-ray reports and other imaging results.</b></li> </ul> |                                                                                                                                                                                                                                                                                                                                                                                                                                                                                                                                                                          |                       |                              |          |
|------------------------------------------------------------------------------------------------------------------------------------------------------------------------------------------------------------------------------------------------------------------------------------------------------------------------------------------------------------------------------------------------------------------------------------------------------------------------------------------------------------------------------------------------------------------------------------------------------------------------------------------------------------------|--------------------------------------------------------------------------------------------------------------------------------------------------------------------------------------------------------------------------------------------------------------------------------------------------------------------------------------------------------------------------------------------------------------------------------------------------------------------------------------------------------------------------------------------------------------------------|-----------------------|------------------------------|----------|
| Areas of Assessment                                                                                                                                                                                                                                                                                                                                                                                                                                                                                                                                                                                                                                              | Assessment Details                                                                                                                                                                                                                                                                                                                                                                                                                                                                                                                                                       | Yearly Wellness Visit | Primary Care every 6 months* | Baseline |
| <b>Genetics/<br/>MECP2 Testing Results</b>                                                                                                                                                                                                                                                                                                                                                                                                                                                                                                                                                                                                                       | Counsel family on genetic test results and refer to genetic counselor if appropriate for additional counsel or explanation. Family and PCP to keep a copy of genetic results.                                                                                                                                                                                                                                                                                                                                                                                            |                       |                              | ✓        |
| <b>General</b>                                                                                                                                                                                                                                                                                                                                                                                                                                                                                                                                                                                                                                                   | Update current medications and allergies                                                                                                                                                                                                                                                                                                                                                                                                                                                                                                                                 |                       | At every visit               |          |
|                                                                                                                                                                                                                                                                                                                                                                                                                                                                                                                                                                                                                                                                  | Weight                                                                                                                                                                                                                                                                                                                                                                                                                                                                                                                                                                   |                       | At every visit               |          |
|                                                                                                                                                                                                                                                                                                                                                                                                                                                                                                                                                                                                                                                                  | Height or body length                                                                                                                                                                                                                                                                                                                                                                                                                                                                                                                                                    |                       | At every visit               |          |
|                                                                                                                                                                                                                                                                                                                                                                                                                                                                                                                                                                                                                                                                  | Body mass index                                                                                                                                                                                                                                                                                                                                                                                                                                                                                                                                                          |                       | At every visit               |          |
|                                                                                                                                                                                                                                                                                                                                                                                                                                                                                                                                                                                                                                                                  | Head circumference <sup>1</sup>                                                                                                                                                                                                                                                                                                                                                                                                                                                                                                                                          |                       | At every visit               |          |
|                                                                                                                                                                                                                                                                                                                                                                                                                                                                                                                                                                                                                                                                  | Tanner Stage                                                                                                                                                                                                                                                                                                                                                                                                                                                                                                                                                             |                       | At yearly wellness           |          |
|                                                                                                                                                                                                                                                                                                                                                                                                                                                                                                                                                                                                                                                                  | <b>Laboratory evaluations</b> (see below)                                                                                                                                                                                                                                                                                                                                                                                                                                                                                                                                |                       | (see below)                  |          |
| <b>Gastrointestinal</b>                                                                                                                                                                                                                                                                                                                                                                                                                                                                                                                                                                                                                                          | Review: feeding methods, appetite, chewing ability, choking and length of feeding time.                                                                                                                                                                                                                                                                                                                                                                                                                                                                                  | ✓                     | ✓                            |          |
|                                                                                                                                                                                                                                                                                                                                                                                                                                                                                                                                                                                                                                                                  | Screen for GE reflux, gas bloating, biliary tract disease, constipation and hemorrhoids, skin tags, or fissures.                                                                                                                                                                                                                                                                                                                                                                                                                                                         | ✓                     | ✓                            |          |
| <b>Nutrition</b>                                                                                                                                                                                                                                                                                                                                                                                                                                                                                                                                                                                                                                                 | Review nutritional and herbal supplements<br>Nutrition screening <sup>2</sup> : energy, protein, fluids, sodium, potassium, calcium, and vitamin D intake.<br>Consider nutrition related laboratory screening (yearly): CBC, electrolyte panel, 25-OH-vitamin D, fasting lipids                                                                                                                                                                                                                                                                                          | ✓                     | ✓                            |          |
| <b>Respiratory</b>                                                                                                                                                                                                                                                                                                                                                                                                                                                                                                                                                                                                                                               | Screen for awake disordered breathing (hyperventilating, breath-holding, color change), and air swallowing.                                                                                                                                                                                                                                                                                                                                                                                                                                                              | ✓                     |                              |          |
| <b>Neurology</b>                                                                                                                                                                                                                                                                                                                                                                                                                                                                                                                                                                                                                                                 | Screen for presence of paroxysmal events (seizures or non-epileptic spells suspicious for seizures). Advise caregivers to keep a log with description of distinct event types and frequency. Refer to Neurology if an event occurs repeatedly for diagnostic clarification. Encourage follow-up with neurologist routinely; every 6 months if treated for seizures. If individual's weight fluctuates (more than 10-20%), request neurologist to consider adjusting anticonvulsant doses accordingly. Laboratory follow-up as needed for use of antiseizure medications. | ✓                     | ✓                            | ✓        |
|                                                                                                                                                                                                                                                                                                                                                                                                                                                                                                                                                                                                                                                                  | Screen for abnormal movements (stereotypies and dystonia) and level of impact on daily                                                                                                                                                                                                                                                                                                                                                                                                                                                                                   | ✓                     |                              | ✓        |

|                                       |                                                                                                                                                                                                                                                                                                                       |        |                         |   |
|---------------------------------------|-----------------------------------------------------------------------------------------------------------------------------------------------------------------------------------------------------------------------------------------------------------------------------------------------------------------------|--------|-------------------------|---|
|                                       | activities.                                                                                                                                                                                                                                                                                                           |        |                         |   |
| <b>Cardiology</b>                     | 12-lead ECG to screen for prolonged QTc interval; if abnormal, refer to Cardiology.                                                                                                                                                                                                                                   | ✓      |                         | ✓ |
| <b>Skin</b>                           | Document temperature and color of hands and feet. Screen for skin breakdown from hand-mouthing or ill-fitting braces. Screen for pressure ulcers.                                                                                                                                                                     | ✓      | ✓                       |   |
| <b>Orthopedics<br/>Rehabilitation</b> | Estimate curvature of spine. Recheck every 6 months if scoliosis present; refer to Orthopedics if > 20 degrees.                                                                                                                                                                                                       | ✓      | (if scoliosis present✓) |   |
|                                       | Screen for abnormal hip abduction, range of motion and leg length.                                                                                                                                                                                                                                                    | ✓      | ✓                       |   |
|                                       | Screen for contractures and use or need of devices to prevent them (ankle-foot orthoses and splints).                                                                                                                                                                                                                 | ✓      |                         |   |
|                                       | Discuss risk of fractures due to osteopenia.<br>Screen for needs and use of mobility aids.                                                                                                                                                                                                                            | ✓<br>✓ |                         |   |
| <b>Urology</b>                        | Review toilet training, frequency and infrequency of urination, and urinary tract infections. Refer to Urology for frequent urinary tract infections or urinary retention. Consider Urology related laboratory screening (every 2 years): urinalysis                                                                  | ✓      |                         |   |
| <b>Development</b>                    | Documentation of baseline, gains and losses of milestones. Fine motor: hand use: raking grasp, pincer grasp, rake, holding cup or spoon. Gross motor: sitting, standing, and walking. Language: coo, babble, laugh, words.                                                                                            | ✓      |                         | ✓ |
| <b>Communication</b>                  | Screen communication methods used by family and school: eye pointing, vocalizations, switches, ipad, eye-gaze device.                                                                                                                                                                                                 | ✓      |                         | ✓ |
| <b>Behavioral</b>                     | Screen for symptoms of anxiety and depression, such as withdrawal, screaming and irritability. Inquire about sensory processing difficulties.                                                                                                                                                                         | ✓      | ✓                       | ✓ |
| <b>Sleep</b>                          | Review sleep initiation, staying asleep, snoring or coughing, and frequency of nocturnal interventions by caregivers. Review safety of bed and bedroom. Consider laboratory evaluation for iron deficiency if concerns arise about disrupted sleep or restless leg syndrome: ferritin, serum iron, TIBC, transferrin. | ✓      | ✓                       | ✓ |
| <b>Pain</b>                           | Discuss delayed pain response and describe individual's response to pain.                                                                                                                                                                                                                                             | ✓      |                         |   |
| <b>Extremities</b>                    | Temperature dysregulation. Review environmental factors that might impact comfort.                                                                                                                                                                                                                                    | ✓      |                         |   |
| <b>Screenings</b>                     | Screen for vision concerns and consider referral for formal vision assessment including acuity, spatial, depth, visual fields and cortical visual impairment.                                                                                                                                                         | ✓      |                         |   |
|                                       | Review newborn ABR results at baseline, consider repeating ABR if history of chronic otitis media, consider evaluation for auditory processing delay.                                                                                                                                                                 | ✓      |                         | ✓ |
|                                       | Annual dental health screening; refer for cleaning every 6 months.                                                                                                                                                                                                                                                    | ✓      |                         |   |
| <b>Education/Therapies</b>            | Review for presence of current IEP (see info on RettSyndrome.org)<br>Documentation of therapies (type and frequency).                                                                                                                                                                                                 | ✓<br>✓ |                         | ✓ |
| <b>Family/Social<br/>Resources</b>    | Assess for family stress (financial, social, fatigue)<br>Review available community and insurance resources (disabled parking permit, respite care etc.)<br>In adolescent individuals review plans for obtaining guardianship. Clinician may be required                                                              | ✓<br>✓ | ✓                       | ✓ |

|  |                                                                                       |  |  |  |
|--|---------------------------------------------------------------------------------------|--|--|--|
|  | to write Letters of Medical Necessity for equipment and sign school medication forms. |  |  |  |
|--|---------------------------------------------------------------------------------------|--|--|--|

\*6month follow-up visit is medically necessary to screen for issues that can appear quickly, progress rapidly and require intervention

<sup>1</sup>Please see CDC or Nellhaus head circumference chart for age 0-18 years

<sup>2</sup>Please see **Food and Drink Log** (<https://www.rettsyndrome.org/pcg>) to ensure adequate calcium, vitamin D, energy and fluid intake

Confidential: For Review Only

**Tables 3-7. Detailed approaches to management and therapy for RTT.** References not specific to RTT noted as “See:”.

| <b>Table 3: Genetics, Neurology, Cardiology, Respiratory, and Urology</b> |                                                                       |                                                                                                                                                                                                                                                                                                                                                                                                                                                                                                                                                                                                                                                                                  |                   |
|---------------------------------------------------------------------------|-----------------------------------------------------------------------|----------------------------------------------------------------------------------------------------------------------------------------------------------------------------------------------------------------------------------------------------------------------------------------------------------------------------------------------------------------------------------------------------------------------------------------------------------------------------------------------------------------------------------------------------------------------------------------------------------------------------------------------------------------------------------|-------------------|
| <b>System/Area</b>                                                        | <b>Common concerns and questions</b>                                  | <b>Details and suggested approach</b>                                                                                                                                                                                                                                                                                                                                                                                                                                                                                                                                                                                                                                            | <b>References</b> |
| <b>Genetics</b>                                                           | <i>MECP2</i> gene                                                     | For suspicion of Rett syndrome, <i>MECP2</i> gene sequencing and MLPA testing is recommended. MLPA testing is needed to detect deletions otherwise missed by sequencing; this test is necessary if no abnormalities are found by sequencing. Referral to a geneticist or genetic counselor is recommended to review recurrence risks and answer related questions. Genetic testing results are essential for enrollment in clinical trials. Referral to a Rett Center if feasible may be useful to provide multidisciplinary care and access to clinical trials.                                                                                                                 | 16 85 86          |
| <b>Neurology</b>                                                          | Seizures and Spells                                                   | Refer to neurologist for seizures and spells suspicious for seizures with follow-up every 6 months if treated with an anticonvulsant. It is difficult to differentiate between a non-epileptic Rett Spell and a seizure (both may be present). Individuals can have multiple types of seizures. Seizure logs by the family are needed with careful description of events that includes frequency and duration. Videos of events are helpful to the neurologist. The neurologist may order a video EEG to accurately characterize whether a type of event is a seizure or not. An overnight EEG may be necessary to capture sleep; an EEG is incomplete if sleep is not captured. | 53-56             |
|                                                                           | Abnormal movements                                                    | Ataxic gait and an impaired spatial awareness (proprioception) are common. Stereotypical hand movements (hand-wringing, mouthing, etc) are typical. These are often disruptive to hand use. Use of splints to elbows or hand guards, which may be prescribed by an OT, may be helpful to improve hand use. Initially, most individuals have low tone that progresses over years to high tone and dystonia. Neurologist or physiatrist may prescribe neuromuscular blockade or other medications to reduce tone to maintain function and prevent contractures.                                                                                                                    | 67 68 87 88       |
| <b>Cardiology</b>                                                         | Abnormal ECG                                                          | Yearly ECG to check for prolonged QTc interval which can develop at any time. Referral to cardiologist if the ECG is abnormal, who may consider further studies (Holter monitor, echocardiogram) or treatment. Avoid prescription of medications that can prolong QTc interval (i.e. fluoxetine). A current ECG is recommended before anesthesia.                                                                                                                                                                                                                                                                                                                                | 49-52             |
|                                                                           | Poor circulation                                                      | Distal temperature asymmetries are common and thought to be autonomic in origin; no specific therapy is recommended.                                                                                                                                                                                                                                                                                                                                                                                                                                                                                                                                                             | 61 89 90          |
| <b>Respiratory</b>                                                        | Hyperventilation, air swallowing, breath holding, blowing raspberries | Due to autonomic dysregulation, these may occur during the day. While not purposeful, they may be triggered by anxiety. Currently, there are no medications or treatments for this. If night time apneas are present, check tonsils and consider ordering a comprehensive sleep study and related specialist referral. Breathing abnormalities may disrupt feeding.                                                                                                                                                                                                                                                                                                              | 62 63 91-93       |
| <b>Urology</b>                                                            | Urine retention                                                       | Autonomic dysfunction can lead to delayed bladder emptying and bladder distension. If present, referral to urology may be needed. Constipation can increase risk of UTIs. Toilet training can be achieved in some cases. Certain medications or poor fluid intake can cause increase risk of kidney stones.                                                                                                                                                                                                                                                                                                                                                                      | 69 70 See: 94     |



**Table 4: Gastroenterology and Nutrition**

| <b>System/Area</b>                    | <b>Common concerns and questions</b> | <b>Details and suggested approach</b>                                                                                                                                                                                                                                                                                                                                                                                                                                                                                                                                                                                                      | <b>References</b> |
|---------------------------------------|--------------------------------------|--------------------------------------------------------------------------------------------------------------------------------------------------------------------------------------------------------------------------------------------------------------------------------------------------------------------------------------------------------------------------------------------------------------------------------------------------------------------------------------------------------------------------------------------------------------------------------------------------------------------------------------------|-------------------|
| <b>Gastroenterology and Nutrition</b> | Dysmotility                          | Abdominal pain and discomfort typically are caused by reflux, gas bloating, delayed stomach emptying, biliary tract disease, or constipation; these can be empirically diagnosed and managed (see below). These will present with abdominal fullness (gas or constipation), irritability (reflux or constipation), nocturnal arousals (reflux or constipation), arching (reflux), overt reflux or emesis, burping (reflux or air swallowing). Gall bladder dysfunction, screened by abdominal ultrasound, should be considered. Referral to surgery for cholecystectomy may be necessary for symptomatic gallstones or biliary dyskinesia. | 37 38 40 72       |
|                                       | Constipation                         | <u>This is a very common problem.</u> Laxatives (polyethylene glycol, magnesium hydroxide, glycerin or bisacodyl suppositories) are often a part of long-term treatment with a goal of one soft bowel movement per day.                                                                                                                                                                                                                                                                                                                                                                                                                    | 37 40             |
|                                       | Reflux                               | <u>This is a very common problem.</u> PPI or H2 blockers are used empirically. Referral to gastroenterologist may be necessary to rule out complications such as esophagitis, ulcer, strictures, or Barrett's esophagus.                                                                                                                                                                                                                                                                                                                                                                                                                   | 37 40             |
|                                       | Poor weight gain                     | Fatigue and irritability may be signs that dietary requirements are not being met; consider energy dense foods (oils, syrups, avocado), gastroenterologist, and nutrition consults. Gastrostomy-button may be needed to maintain growth; counsel families that use of a gastrostomy button does not preclude oral feeding as long as oral feeding is safe. Use CDC/WHO growth charts to track growth and try to keep at same BMI percentile on growth curve through adolescent growth spurt. RTT-specific growth charts are also available.                                                                                                | 37-39 95 96       |
|                                       | Calcium/Vitamin D                    | Ensure supplemental Vitamin D intake: 600-1000 IU or more daily. Target serum levels of 25-OH-Vitamin D greater than 30-40 ng/ml. Ensure milk and dairy products to provide age-appropriate dietary calcium intakes: 1-3 y, 700 mg/d; 4-8 y, 1000 mg/d; 9-18 y, 1300 mg/d; 19 y and older, 1000 mg/d. 240 ml (8 oz) of milk or 240 ml (8 oz) of yogurt contains 300 mg of calcium.                                                                                                                                                                                                                                                         | 77-79 See: 97     |
|                                       | Prolonged feeding times              | Long feeding times (more than 30 minutes) can affect quality of life for patient and family; this may be an indication that a gastrostomy button is needed.                                                                                                                                                                                                                                                                                                                                                                                                                                                                                | 64 96 See: 98     |
|                                       | Chewing/swallowing difficulties      | Referral to appropriate therapist or gastroenterologist to assess if there is concern for aspiration (coughing, choking, gagging with feeding or aspiration or unexplained pneumonia). In some cases, thickeners for liquids may be helpful to prevent aspiration versus need for a gastrostomy button.                                                                                                                                                                                                                                                                                                                                    | 37 38             |

**Table 5: Orthopedics, Rehabilitation, Skin, Endocrine, and Hospitalization**

| <b>System/Area</b>                 | <b>Common concerns and questions</b>                           | <b>Details and suggested approach</b>                                                                                                                                                                                                                                                                                                                                                                                                                                                                                                                                                                                                                                                                                                              | <b>References</b>          |
|------------------------------------|----------------------------------------------------------------|----------------------------------------------------------------------------------------------------------------------------------------------------------------------------------------------------------------------------------------------------------------------------------------------------------------------------------------------------------------------------------------------------------------------------------------------------------------------------------------------------------------------------------------------------------------------------------------------------------------------------------------------------------------------------------------------------------------------------------------------------|----------------------------|
| <b>Orthopedics, Rehabilitation</b> | Scoliosis                                                      | Increased risk of neuromuscular scoliosis after age 6; risk typically abates after puberty. This can progress rapidly if present, necessitating re-observation every 6 months if present. Supine x-ray and orthopedic referral when scoliotic curvature greater than 20 degrees; correction may be indicated when greater than 40 degrees. Kyphosis is more common in ambulatory individuals.                                                                                                                                                                                                                                                                                                                                                      | 65 99-102                  |
|                                    | Increased risk of hip subluxation                              | Examine hip range of motion due to high risk for hip subluxation and contractures, as either may be source of pain and cause for irritability. X-ray-AP views of pelvis may be needed to evaluate femoral head coverage.                                                                                                                                                                                                                                                                                                                                                                                                                                                                                                                           | 103                        |
|                                    | Contractures                                                   | Encourage families and caregivers to inspect all joints and practice daily range of motion, especially if mobility is reduced in an acute setting (illness or hospitalization). Consider OT and PT consults for bracing and splinting. Consider neurology and physiatry consults for neuromuscular blockade or other medications to improve tone.                                                                                                                                                                                                                                                                                                                                                                                                  | 104 105                    |
|                                    | Osteopenia and fractures                                       | There is higher risk of fracture due to immobility and use of anticonvulsants. If fracture occurs, consider DEXA scan and referral to endocrine specialist (in addition to aggressive screen of calcium, vitamin D intake and 25-OH-vitamin D levels). Cause for fractures beyond osteopenia needs investigation in order to eliminate other preventable causes, such as falling out of bed (needs rails), falling at home (needs assessment of home) or non-accidental trauma.                                                                                                                                                                                                                                                                    | 77-81 95 97 106 107        |
|                                    | Equipment                                                      | There is risks of injury due to outgrown equipment (See Skin above). Family and caregivers may need lifts, shower accommodations, bed-side toilets, etc.; these needs may be best assessed by a physiatry referral.                                                                                                                                                                                                                                                                                                                                                                                                                                                                                                                                | See: <sup>108</sup>        |
| <b>Skin</b>                        | Breakdown from mouthing or equipment or lack of re-positioning | Redness persisting longer than 20 min after equipment (such as a splint) is removed is of concern for development of pressure ulcers; return to PT to re-fit equipment. OT or PT may prescribe splints on elbows or hands to prevent skin breakdown from mouthing. Decubitus ulcer may need consultation with wound specialist and equipment specialist.                                                                                                                                                                                                                                                                                                                                                                                           | 105                        |
| <b>Endocrinology, Gynecology</b>   | Premature adrenarche                                           | Menarche comes later, but breast buds and pubic hair may begin earlier than in typically developing children. Periods may be irregular due to low body weight or stress; T4, TSH should be checked if periods are irregular. Counsel family to notice whether or not seizure frequency corresponds with menstrual cycle and alert neurologist. Consideration of menses suppression should be considered, especially if it disrupts the interactions with caregivers and family or hormonal fluctuations correspond with increased seizure activity. The impact of menses suppression on bone health should be considered; IUD is a consideration. Avoidance of DEPO-provera is a consideration. Well-woman examination should include breast exam. | 66 <sup>109</sup> See: 110 |
| <b>Hospitalization</b>             | Anesthesia sensitivity, impaired proprioception                | Individuals may be more sensitive to effects of anesthetics. They may take longer to awaken from anesthesia. It is important to ensure anesthesiologist is aware of current medications (especially anticonvulsants and cannabis preparations), type and description of seizures, breathing abnormalities and risk of presence of prolonged QTc; a recent ECG is essential. Hospital needs to be aware of impaired proprioception, lack of hand use, inability to change position and increased fall risk. If hospitalized, family or hospital should perform daily ROM to prevent contractures.                                                                                                                                                   | 49-51 57-59 62 63          |

**Table 6: Psychological, Behavioral, Sleep, Pain, and Screenings**

| <b>System/Area</b>               | <b>Common concerns and questions</b>     | <b>Details and suggested approach</b>                                                                                                                                                                                                                                                                                                                                                                                                                                                                      | <b>References</b>    |
|----------------------------------|------------------------------------------|------------------------------------------------------------------------------------------------------------------------------------------------------------------------------------------------------------------------------------------------------------------------------------------------------------------------------------------------------------------------------------------------------------------------------------------------------------------------------------------------------------|----------------------|
| <b>Psychological, Behavioral</b> | Issues with inattention/anxiety          | Auditory processing is delayed and may be misinterpreted as disinterest; allow for this delay when assessing non-verbal language by allowing additional time for responses to questions or commands. Behavioral inconsistency is typical and may be affected by physical factors such as sleep or environment. Assess for intolerance of excessive stimuli (i.e. bright lights, loud noises).                                                                                                              | 46 47                |
|                                  | Externalizing/internalizing behaviors    | Screen for caregiver impressions of anxiety and depression, such as withdrawal; these may become more prominent with age or in individuals with milder clinical presentations. Identify possible contributors (e.g., sedating medications, decreased social interaction, limited access to engaging activities). Consider treatment with an SSRI such as escitalopram which may have a lower risk of inducing a prolonged QTc interval.                                                                    | 15 76 82 111         |
| <b>Sleep</b>                     | Disrupted sleep                          | Circadian rhythm is often disrupted; consider melatonin to initiate sleep and trazodone or clonidine to maintain asleep. Patient may be getting out of bed, which could be unsafe; consider a tent-style bed or similar engineering controls to keep child in bed and safe. Consider ferritin, serum iron, TIBC and transferrin levels if there is disrupted sleep or concerns for restless leg syndrome and need for iron replacement. Consider overnight sleep study for snoring or pauses in breathing. | 112 113 See: 114-116 |
| <b>Pain</b>                      | Pain assessment and sensitivity          | Individuals have an atypical pain response giving appearance of decreased sensitivity and have variable indications of pain (i.e. grimace, crying, increase in repetitive movements); typical pain scales may be difficult to interpret or apply.                                                                                                                                                                                                                                                          | 60                   |
|                                  | Increased risk of chronic pain           | Often due to GI problems (see above), dental problems, immobility and positioning. Always consider hip subluxation, vertebral compression fractures or other fractures as cause of pain.                                                                                                                                                                                                                                                                                                                   | 37 40 71 72          |
| <b>Screening: Ophthalmology</b>  | Difficult vision assessment              | Since eye gaze is the main way of communicating, assessment by a practitioner familiar with special needs individuals and cortical visual impairment is needed. Practitioner familiar with cortical visual impairment and ocular apraxia is needed.                                                                                                                                                                                                                                                        | 48 104               |
| <b>Screening: Auditory</b>       | Auditory processing delay                | Hearing is typically normal and assessments are often difficult to obtain but if chronic otitis media is present, these are needed.                                                                                                                                                                                                                                                                                                                                                                        | 45                   |
| <b>Screening: Dental</b>         | Teeth grinding, increased risk of caries | Routine cleanings needed and may require anesthesia. Dental work under anesthesia should be done with proper anesthesia support at major medical institutions. Regular dental care is required to avoid tooth extraction; tooth extraction significantly interferes with oral function and is to therefore be avoided if at all possible.                                                                                                                                                                  | 88 117               |

**Table 7: Development, Education, Therapies, Social, and Alternative Medications**

| <u>System/Area</u>                          | <u>Common concerns and questions</u> | <u>Details and suggested approach</u>                                                                                                                                                                                                                                                                                                                                                                                                                                                                                                                                                                                                                                                                                                                                                                                                                                                                                                                                                                                                                                                                                                                                                                                                                                                                                                                                                                                                                                                                           | <u>References</u> |
|---------------------------------------------|--------------------------------------|-----------------------------------------------------------------------------------------------------------------------------------------------------------------------------------------------------------------------------------------------------------------------------------------------------------------------------------------------------------------------------------------------------------------------------------------------------------------------------------------------------------------------------------------------------------------------------------------------------------------------------------------------------------------------------------------------------------------------------------------------------------------------------------------------------------------------------------------------------------------------------------------------------------------------------------------------------------------------------------------------------------------------------------------------------------------------------------------------------------------------------------------------------------------------------------------------------------------------------------------------------------------------------------------------------------------------------------------------------------------------------------------------------------------------------------------------------------------------------------------------------------------|-------------------|
| <b>Development, Education and Therapies</b> | Developmental Milestones             | Developmental regression (reduced hand use and language) typically stops between 2-3 years. Skills can be maintained and possibly regained with vigorous therapies. Therapies to consider: speech therapy (ST), feeding therapy (FT), occupational therapy (OT), augmentative communication therapy (AAC), vision therapy (VT), hippotherapy (horse) and swim/pool therapy.                                                                                                                                                                                                                                                                                                                                                                                                                                                                                                                                                                                                                                                                                                                                                                                                                                                                                                                                                                                                                                                                                                                                     | 43 44 48 104 118  |
|                                             | IEP and therapy challenges           | Educators may not have experience with Rett syndrome. Request they focus on communication, mobility, and socialization with attention to apraxia. Educators and therapists need to be informed that the approach to therapy in Rett syndrome is different: it is about maintaining skills as well as recovery. Therapies for Rett syndrome should include occupational, physical, speech, swallow and augmentative communication. Therapy that maximizes physical activities should be life-long, as these will minimize long-term complications and maximize long-term potentials. Educational opportunities that provide intensive physical, occupational and speech therapy, especially those that provide augmentative communication, allow individuals to learn and make the best progress. If CVI is present, then a Teacher of the Visually Impaired (TVI) should be included in the IEP. These essential accommodations to facilitate education are in accordance with disability rights legislation enacted in many countries throughout the world as required by the United Nations Convention on the Rights of Persons with Disabilities (CRPD). This international treaty signed by nearly all 193 U.N. Member States defines access to an inclusive, quality and free education as a basic human right of individuals with disabilities. Families should work with schools to develop an IEP that recognizes this; referral to a Rett Specialist may provide additional assistance in this regard. | 43 44             |
|                                             | Non-verbal communication             | Alternative and augmentative communication assessments are needed. While this can be done by some speech therapists, a specific referral may be needed. Since eye gaze is typically the most effective form of communication, special eye gaze devices can give individuals a voice. These referrals should be made as early as possible to coincide with typical language development. Devices should be made available to individuals at both home and school. Home use is to be encouraged as this setting may be the longest after the child graduates from the school system.                                                                                                                                                                                                                                                                                                                                                                                                                                                                                                                                                                                                                                                                                                                                                                                                                                                                                                                              | 43 104            |
| <b>Social Concerns</b>                      | Increased family stress              | Family may need respite care. Sibling reactions and their adjustment should be considered; families could provide education for extended family and friends to understand Rett syndrome through patient advocacy group websites. When appropriate, discussion of Rett genetics with older siblings of child-bearing age should be considered by referral to a genetic counselor.                                                                                                                                                                                                                                                                                                                                                                                                                                                                                                                                                                                                                                                                                                                                                                                                                                                                                                                                                                                                                                                                                                                                | 35 36 119 120     |
| <b>Alternative medications</b>              | Cannabis, St John's wort, etc.       | Families should be encouraged to disclose use of alternative medications (cannabis, oils etc) to all specialists.                                                                                                                                                                                                                                                                                                                                                                                                                                                                                                                                                                                                                                                                                                                                                                                                                                                                                                                                                                                                                                                                                                                                                                                                                                                                                                                                                                                               |                   |

## References

1. Neul JL, Kaufmann WE, Glaze DG, et al. Rett syndrome: revised diagnostic criteria and nomenclature. *AnnNeurol* 2010;68(6):944-50.
2. Hagberg B. Rett's syndrome: prevalence and impact on progressive severe mental retardation in girls. *Acta Paediatr Scand* 1985;74(3):405-8.
3. Armstrong DD. Rett syndrome neuropathology review 2000. *Brain Dev* 2001;23 Suppl 1:S72-6.
4. Guy J, Gan J, Selfridge J, et al. Reversal of neurological defects in a mouse model of Rett syndrome. *Science* 2007;315(5815):1143-7. doi: 10.1126/science.1138389
5. Sinnott SE, Hector RD, Gadalla KKE, et al. Improved MECP2 Gene Therapy Extends the Survival of MeCP2-Null Mice without Apparent Toxicity after Intracisternal Delivery. *Mol Ther Methods Clin Dev* 2017;5:106-15. doi: 10.1016/j.omtm.2017.04.006
6. Neul JL, Fang P, Barrish J, et al. Specific mutations in methyl-CpG-binding protein 2 confer different severity in Rett syndrome. *Neurology* 2008;70(16):1313-21.
7. Tillotson R, Bird A. The Molecular Basis of MeCP2 Function in the Brain. *J Mol Biol* 2019 doi: 10.1016/j.jmb.2019.10.004 [published Online First: 2019/10/21]
8. Archer H, Evans J, Leonard H, et al. Correlation between clinical severity in patients with Rett syndrome with a p.R168X or p.T158M MECP2 mutation, and the direction and degree of skewing of X-chromosome inactivation. *J Med Genet* 2007;44(2):148-52. doi: 10.1136/jmg.2006.045260
9. Grillo E, Lo RC, Bianciardi L, et al. Revealing the complexity of a monogenic disease: rett syndrome exome sequencing. *PLoSOne* 2013;8(2):e56599.
10. Artuso R, Papa FT, Grillo E, et al. Investigation of modifier genes within copy number variations in Rett syndrome. *J Hum Genet* 2011;56(7):508-15. doi: 10.1038/jhg.2011.50
11. Zeev BB, Bebbington A, Ho G, et al. The common BDNF polymorphism may be a modifier of disease severity in Rett syndrome. *Neurology* 2009;72(14):1242-7. doi: 10.1212/01.wnl.0000345664.72220.6a
12. Cuddapah VA, Pillai RB, Shekar KV, et al. Methyl-CpG-binding protein 2 (MECP2) mutation type is associated with disease severity in Rett syndrome. *J MedGenet* 2014;51(3):152-58.
13. Hagberg B, Goutieres F, Hanefeld F, et al. Rett syndrome: criteria for inclusion and exclusion. *Brain Dev* 1985;7(3):372-3. doi: 10.1016/s0387-7604(85)80048-6
14. Tarquinio DC, Hou W, Neul JL, et al. The Changing Face of Survival in Rett Syndrome and MECP2-Related Disorders. *Pediatr Neurol* 2015;53(5):402-11. doi: 10.1016/j.pediatrneurol.2015.06.003
15. Halbach N, Smeets E, Steinbusch C, et al. Aging in Rett syndrome: a longitudinal study. *ClinGenet* 2012
16. Fehr S, Bebbington A, Nassar N, et al. Trends in the diagnosis of Rett syndrome in Australia. *Pediatr Res* 2011;70(3):313-9. doi: 10.1203/PDR.0b013e3182242461
17. Villard L. MECP2 mutations in males. *J Med Genet* 2007;44(7):417-23. doi: 10.1136/jmg.2007.049452
18. Neul JL, Benke TA, Marsh ED, et al. The array of clinical phenotypes of males with mutations in Methyl-CpG binding protein 2. *Am J Med Genet B Neuropsychiatr Genet* 2019;180(1):55-67. doi: 10.1002/ajmg.b.32707
19. Paciorkowski AR, Seltzer LE, Neul JL. Developmental Encephalopathies. In: Swaiman KF, Ashwal S, Ferriero DM, et al., eds. Swaiman's Pediatric Neurology. 6 ed. Philadelphia: Mosby 2018:242-48.
20. Ramocki MB, Tavyev YJ, Peters SU. The MECP2 duplication syndrome. *Am J Med Genet A* 2010;152A(5):1079-88. doi: 10.1002/ajmg.a.33184 [doi] [published Online First: 2010/04/29]
21. Miguet M, Faivre L, Amiel J, et al. Further delineation of the MECP2 duplication syndrome phenotype in 59 French male patients, with a particular focus on morphological and neurological



- features. *J Med Genet* 2018;55(6):359-71. doi: 10.1136/jmedgenet-2017-104956 [published Online First: 2018/04/06]
22. Peters SU, Fu C, Suter B, et al. Characterizing the Phenotypic Effect of Xq28 Duplication Size in MECP2 Duplication Syndrome. *Clin Genet* 2019 doi: 10.1111/cge.13521
23. Bahi-Buisson N, Villeneuve N, Caietta E, et al. Recurrent mutations in the CDKL5 gene: genotype-phenotype relationships. *AmJ MedGenetA* 2012;158A(7):1612-19.
24. Mangatt M, Wong K, Anderson B, et al. Prevalence and onset of comorbidities in the CDKL5 disorder differ from Rett syndrome. *Orphanet J Rare Dis* 2016;11:39. doi: 10.1186/s13023-016-0418-y
25. Mori Y, Downs J, Wong K, et al. Impacts of caring for a child with the CDKL5 disorder on parental wellbeing and family quality of life. *Orphanet J Rare Dis* 2017;12(1):16. doi: 10.1186/s13023-016-0563-3
26. Olson HE, Demarest ST, Pestana-Knight EM, et al. Cyclin-Dependent Kinase-Like 5 Deficiency Disorder: Clinical Review. *Pediatr Neurol* 2019 doi: 10.1016/j.pediatrneurol.2019.02.015
27. Florian C, Bahi-Buisson N, Bienvenu T. FOXP1-Related Disorders: From Clinical Description to Molecular Genetics. *MolSyndromol* 2012;2(3-5):153-63.
28. Ma M, Adams HR, Seltzer LE, et al. Phenotype Differentiation of FOXP1 and MECP2 Disorders: A New Method for Characterization of Developmental Encephalopathies. *J Pediatr* 2016;178:233-40 e10. doi: 10.1016/j.jpeds.2016.08.032
29. Vegas N, Cavallin M, Maillard C, et al. Delineating FOXP1 syndrome: From congenital microcephaly to hyperkinetic encephalopathy. *Neurol Genet* 2018;4(6):e281. doi: 10.1212/NXG.0000000000000281
30. Mitter D, Pringsheim M, Kaulisch M, et al. FOXP1 syndrome: genotype-phenotype association in 83 patients with FOXP1 variants. *Genet Med* 2018;20(1):98-108. doi: 10.1038/gim.2017.75
31. Percy AK, Neul JL, Glaze DG, et al. Rett syndrome diagnostic criteria: lessons from the Natural History Study. *AnnNeurol* 2010;68(6):951-55.
32. Anderson A, Wong K, Jacoby P, et al. Twenty years of surveillance in Rett syndrome: what does this tell us? *Orphanet J Rare Dis* 2014;9:87. doi: 10.1186/1750-1172-9-87
33. Demarest S, Pestana-Knight EM, Olson HE, et al. Severity Assessment in CDKL5 Deficiency Disorder. *Pediatr Neurol* 2019;97:38-42. doi: 10.1016/j.pediatrneurol.2019.03.017
34. Dahl TH. International classification of functioning, disability and health: an introduction and discussion of its potential impact on rehabilitation services and research. *J Rehabil Med* 2002;34(5):201-4.
35. Killian JT, Jr., Lane JB, Lee HS, et al. Caretaker Quality of Life in Rett Syndrome: Disorder Features and Psychological Predictors. *Pediatr Neurol* 2016;58:67-74. doi: 10.1016/j.pediatrneurol.2015.12.021
36. Lane JB, Salter AR, Jones NE, et al. Assessment of Caregiver Inventory for Rett Syndrome. *J Autism Dev Disord* 2017;47(4):1102-12. doi: 10.1007/s10803-017-3034-3 [published Online First: 2017/01/31]
37. Motil KJ, Caeg E, Barrish JO, et al. Gastrointestinal and nutritional problems occur frequently throughout life in girls and women with Rett syndrome. *J PediatrGastroenterolNutr* 2012;55(3):292-98.
38. Motil KJ, Schultz RJ, Browning K, et al. Oropharyngeal dysfunction and gastroesophageal dysmotility are present in girls and women with Rett syndrome. *J Pediatr Gastroenterol Nutr* 1999;29(1):31-7.
39. Tarquinio DC, Motil KJ, Hou W, et al. Growth failure and outcome in Rett syndrome: specific growth references. *Neurology* 2012;79(16):1653-61.
40. Baikie G, Ravikumara M, Downs J, et al. Gastrointestinal dysmotility in Rett syndrome. *J Pediatr Gastroenterol Nutr* 2014;58(2):237-44. doi: 10.1097/MPG.0000000000000200
41. Sheen V, Valencia IM, Torres AR. Atypical features in MECP2 P152R-associated Rett syndrome. *Pediatr Neurol* 2013;49(2):124-6. doi: 10.1016/j.pediatrneurol.2012.12.037

42. Hollander E, Kolevzon A, Coyle JT. Textbook of autism spectrum disorders. 1st ed. Washington, DC: American Psychiatric Pub. 2011.
43. Didden R, Korzilius H, Smeets E, et al. Communication in Individuals with Rett Syndrome: an Assessment of Forms and Functions. *J Dev Phys Disabil* 2010;22(2):105-18. doi: 10.1007/s10882-009-9168-2
44. Downs J, Rodger J, Li C, et al. Environmental enrichment intervention for Rett syndrome: an individually randomised stepped wedge trial. *Orphanet J Rare Dis* 2018;13(1):3. doi: 10.1186/s13023-017-0752-8
45. Pillion JP, Rawool VW, Bibat G, et al. Prevalence of hearing loss in Rett syndrome. *Dev Med Child Neurol* 2003;45(5):338-43. doi: 10.1017/s0012162203000628 [published Online First: 2003/05/06]
46. Lenn NJ, Olsho LW, Turk WR. Auditory processing deficit in a patient with Rett syndrome. *Am J Med Genet Suppl* 1986;1:153-6.
47. Stauder JE, Smeets EE, van Mil SG, et al. The development of visual- and auditory processing in Rett syndrome: an ERP study. *Brain Dev* 2006;28(8):487-94. doi: 10.1016/j.braindev.2006.02.011
48. LeBlanc JJ, DeGregorio G, Centofante E, et al. Visual evoked potentials detect cortical processing deficits in Rett syndrome. *Ann Neurol* 2015;78(5):775-86. doi: 10.1002/ana.24513
49. McCauley MD, Wang T, Mike E, et al. Pathogenesis of lethal cardiac arrhythmias in Mecp2 mutant mice: implication for therapy in Rett syndrome. *SciTranslMed* 2011;3(113):113ra25.
50. Kerr AM, Armstrong DD, Prescott RJ, et al. Rett syndrome: analysis of deaths in the British survey. *Eur Child Adolesc Psychiatry* 1997;6 Suppl 1:71-4.
51. Crosson J, Srivastava S, Bibat GM, et al. Evaluation of QTc in Rett syndrome: Correlation with age, severity, and genotype. *Am J Med Genet A* 2017;173(6):1495-501. doi: 10.1002/ajmg.a.38191
52. Clark BC, Kopp A, Morey W, et al. Serial follow-up of corrected QT interval in Rett syndrome. *Dev Med Child Neurol* 2019 doi: 10.1111/dmcn.14419 [published Online First: 2019/12/05]
53. Glaze DG, Percy AK, Skinner S, et al. Epilepsy and the natural history of Rett syndrome. *Neurology* 2010;74(11):909-12.
54. Glaze DG, Schultz RJ, Frost JD. Rett syndrome: characterization of seizures versus non-seizures. *Electroencephalogr Clin Neurophysiol* 1998;106(1):79-83.
55. Tarquinio DC, Hou W, Berg A, et al. Longitudinal course of epilepsy in Rett syndrome and related disorders. *Brain* 2017;140(2):306-18. doi: 10.1093/brain/aww302
56. Henriksen MW, Breck H, von Tetzchner S, et al. Epilepsy in classic Rett syndrome: Course and characteristics in adult age. *Epilepsy Res* 2018;145:134-39. doi: 10.1016/j.epilepsyres.2018.06.012
57. Kako H, Martin DP, Cartabuke R, et al. Perioperative management of a patient with Rett syndrome. *Int J Clin Exp Med* 2013;6(5):393-403.
58. Tofil NM, Buckmaster MA, Winkler MK, et al. Deep sedation with propofol in patients with Rett syndrome. *J Child Neurol* 2006;21(3):210-3. doi: 10.2310/7010.2006.00051
59. Konarzewski WH, Misso S. Rett syndrome and delayed recovery from anaesthesia. *Anaesthesia* 1994;49(4):357.
60. Downs J, Geranton SM, Bebbington A, et al. Linking MECP2 and pain sensitivity: the example of Rett syndrome. *Am J Med Genet A* 2010;152A(5):1197-205. doi: 10.1002/ajmg.a.33314 [published Online First: 2010/04/29]
61. Hagberg B, Aicardi J, Dias K, et al. A progressive syndrome of autism, dementia, ataxia, and loss of purposeful hand use in girls: Rett's syndrome: report of 35 cases. *Ann Neurol* 1983;14(4):471-9. doi: 10.1002/ana.410140412
62. Glaze DG, Frost JD, Jr., Zoghbi HY, et al. Rett's syndrome: characterization of respiratory patterns and sleep. *Ann Neurol* 1987;21(4):377-82. doi: 10.1002/ana.410210410
63. Tarquinio DC, Hou W, Neul JL, et al. The course of awake breathing disturbances across the lifespan in Rett syndrome. *Brain Dev* 2018;40(7):515-29. doi: 10.1016/j.braindev.2018.03.010 [published Online First: 2018/04/17]



- 1  
2  
3 64. Motil KJ, Morrissey M, Caeg E, et al. Gastrostomy placement improves height and weight gain in  
4 girls with Rett syndrome. *J Pediatr Gastroenterol Nutr* 2009;49(2):237-42. doi:  
5 10.1097/MPG.0b013e31818f61fd  
6  
7 65. Downs J, Torode I, Wong K, et al. The Natural History of Scoliosis in Females With Rett Syndrome.  
8 *Spine (Phila Pa 1976)* 2016;41(10):856-63. doi: 10.1097/BRS.0000000000001399  
9  
10 66. Killian JT, Lane JB, Cutter GR, et al. Pubertal development in Rett syndrome deviates from typical  
11 females. *Pediatr Neurol* 2014;51(6):769-75. doi: 10.1016/j.pediatrneurol.2014.08.013 [published  
12 Online First: 2014/10/07]  
13  
14 67. Humphreys P, Barrowman N. The Incidence and Evolution of Parkinsonian Rigidity in Rett  
15 Syndrome: A Pilot Study. *Can J Neurol Sci* 2016;43(4):567-73. doi: 10.1017/cjn.2016.8  
16  
17 68. FitzGerald PM, Jankovic J, Percy AK. Rett syndrome and associated movement disorders. *Mov*  
18 *Disord* 1990;5(3):195-202. doi: 10.1002/mds.870050303  
19  
20 69. Roth JD, Pariser JJ, Stout TE, et al. Presentation and Management Patterns of Lower Urinary Tract  
21 Symptoms in Adults Due to Rare Inherited Neuromuscular Diseases. *Urology* 2020;135:165-70.  
22 doi: 10.1016/j.urology.2019.09.039 [published Online First: 2019/10/19]  
23  
24 70. Ward CS, Huang TW, Herrera JA, et al. Loss of MeCP2 Causes Urological Dysfunction and  
25 Contributes to Death by Kidney Failure in Mouse Models of Rett Syndrome. *PLoS One*  
26 2016;11(11):e0165550. doi: 10.1371/journal.pone.0165550  
27  
28 71. Freilinger M, Bohm M, Lanator I, et al. Prevalence, clinical investigation, and management of  
29 gallbladder disease in Rett syndrome. *Dev Med Child Neurol* 2014;56(8):756-62. doi:  
30 10.1111/dmcn.12358  
31  
32 72. Motil KJ, Lane JB, Barrish JO, et al. Biliary Tract Disease in Girls and Young Women with Rett  
33 Syndrome. *J Pediatr Gastroenterol Nutr* 2019 doi: 10.1097/MPG.0000000000002273  
34  
35 73. Kirby RS, Lane JB, Childers J, et al. Longevity in Rett syndrome: analysis of the North American  
36 Database. *J Pediatr* 2010;156(1):135-38 e1. doi: 10.1016/j.jpeds.2009.07.015  
37  
38 74. Halbach NS, Smeets EE, Schrandt-Stumpel CT, et al. Aging in people with specific genetic  
39 syndromes: Rett syndrome. *Am J Med Genet A* 2008;146A(15):1925-32.  
40  
41 75. Vignoli A, La Briola F, Peron A, et al. Medical care of adolescents and women with Rett syndrome:  
42 an Italian study. *Am J Med Genet A* 2012;158A(1):13-8. doi: 10.1002/ajmg.a.34367  
43  
44 76. Cianfagione R, Clarke A, Kerr M, et al. Ageing in Rett syndrome. *J Intellect Disabil Res*  
45 2016;60(2):182-90. doi: 10.1111/jir.12228  
46  
47 77. Motil KJ, Schultz RJ, Abrams S, et al. Fractional calcium absorption is increased in girls with Rett  
48 syndrome. *J Pediatr Gastroenterol Nutr* 2006;42(4):419-26. doi:  
49 10.1097/01.mpg.0000189370.22288.0c  
50  
51 78. Motil KJ, Ellis KJ, Barrish JO, et al. Bone mineral content and bone mineral density are lower in  
52 older than in younger females with Rett syndrome. *Pediatr Res* 2008;64(4):435-9. doi:  
53 10.1203/PDR.0b013e318180ebcd  
54  
55 79. Motil KJ, Barrish JO, Neul JL, et al. Low bone mineral mass is associated with decreased bone  
56 formation and diet in girls with Rett syndrome. *J Pediatr Gastroenterol Nutr* 2014;59(3):386-92.  
57 doi: 10.1097/MPG.0000000000000440 [published Online First: 2014/08/22]  
58  
59 80. Jefferson A, Leonard H, Siafarikas A, et al. Clinical Guidelines for Management of Bone Health in  
60 Rett Syndrome Based on Expert Consensus and Available Evidence. *PLoS One*  
2016;11(2):e0146824. doi: 10.1371/journal.pone.0146824  
81. Motil KJ, Barrish JO, Lane J, et al. Vitamin D deficiency is prevalent in girls and women with Rett  
syndrome. *J Pediatr Gastroenterol Nutr* 2011;53(5):569-74.  
82. Buchanan CB, Stallworth JL, Scott AE, et al. Behavioral profiles in Rett syndrome: Data from the  
natural history study. *Brain Dev* 2019;41(2):123-34. doi: 10.1016/j.braindev.2018.08.008  
83. Lotan M, Merrick J, Kandel I, et al. Aging in persons with Rett syndrome: an updated review.  
*ScientificWorldJournal* 2010;10:778-87. doi: 10.1100/tsw.2010.79  
84. Katz DM, Bird A, Coenraads M, et al. Rett Syndrome: Crossing the Threshold to Clinical Translation.  
*Trends Neurosci* 2016;39(2):100-13. doi: 10.1016/j.tins.2015.12.008

- 1  
2  
3 85. Erlandson A, Samuelsson L, Hagberg B, et al. Multiplex ligation-dependent probe amplification  
4 (MLPA) detects large deletions in the MECP2 gene of Swedish Rett syndrome patients. *Genet*  
5 *Test* 2003;7(4):329-32. doi: 10.1089/109065703322783707 [published Online First: 2004/03/06]  
6  
7 86. Gill H, Cheadle JP, Maynard J, et al. Mutation analysis in the MECP2 gene and genetic counselling  
8 for Rett syndrome. *J Med Genet* 2003;40(5):380-4. doi: 10.1136/jmg.40.5.380 [published Online  
9 First: 2003/05/15]  
10  
11 87. Temudo T, Ramos E, Dias K, et al. Movement disorders in Rett syndrome: an analysis of 60 patients  
12 with detected MECP2 mutation and correlation with mutation type. *Mov Disord*  
13 2008;23(10):1384-90. doi: 10.1002/mds.22115  
14  
15 88. Temudo T, Oliveira P, Santos M, et al. Stereotypies in Rett syndrome: analysis of 83 patients with and  
16 without detected MECP2 mutations. *Neurology* 2007;68(15):1183-7. doi:  
17 10.1212/01.wnl.0000259086.34769.78  
18  
19 89. Hagberg B. Clinical manifestations and stages of Rett syndrome. *Ment Retard Dev Disabil Res Rev*  
20 2002;8(2):61-5. doi: 10.1002/mrdd.10020 [published Online First: 2002/07/12]  
21  
22 90. Symons FJ, Byiers B, Hoch J, et al. Infrared Thermal Analysis and Individual Differences in Skin  
23 Temperature Asymmetry in Rett Syndrome. *Pediatr Neurol* 2015;53(2):169-72. doi:  
24 10.1016/j.pediatrneurol.2015.03.018 [published Online First: 2015/05/25]  
25  
26 91. Kerr AM, Julu PO. Recent insights into hyperventilation from the study of Rett syndrome. *Arch Dis*  
27 *Child* 1999;80(4):384-7. doi: 10.1136/adc.80.4.384 [published Online First: 1999/03/23]  
28  
29 92. Krajnc N. Severe respiratory dysrhythmia in Rett syndrome treated with topiramate. *J Child Neurol*  
30 2014;29(10):NP118-21. doi: 10.1177/0883073813508313  
31  
32 93. Gokben S, Ardic UA, Serdaroglu G. Use of buspirone and fluoxetine for breathing problems in Rett  
33 syndrome. *Pediatr Neurol* 2012;46(3):192-4. doi: 10.1016/j.pediatrneurol.2011.12.003  
34  
35 94. Chu DI, Tasian GE, Copelovitch L. Pediatric Kidney Stones - Avoidance and Treatment. *Curr Treat*  
36 *Options Pediatr* 2016;2(2):104-11. doi: 10.1007/s40746-016-0046-8 [published Online First:  
37 2016/10/22]  
38  
39 95. Marchand V, Motil KJ, Nutrition NCo. Nutrition support for neurologically impaired children: a  
40 clinical report of the North American Society for Pediatric Gastroenterology, Hepatology, and  
41 Nutrition. *J Pediatr Gastroenterol Nutr* 2006;43(1):123-35. doi:  
42 10.1097/01.mpg.0000228124.93841.ea  
43  
44 96. Leonard H, Ravikumara M, Baikie G, et al. Assessment and management of nutrition and growth in  
45 Rett syndrome. *J Pediatr Gastroenterol Nutr* 2013;57(4):451-60. doi:  
46 10.1097/MPG.0b013e31829e0b65  
47  
48 97. . In: Ross AC, Taylor CL, Yaktine AL, et al., eds. Dietary Reference Intakes for Calcium and Vitamin  
49 D. Washington (DC)2011.  
50  
51 98. Cook S, Hooper V, Nasser R, et al. Effect of gastrostomy on growth in children with  
52 neurodevelopmental disabilities. *Can J Diet Pract Res* 2005;66(1):19-24. doi:  
53 10.3148/66.1.2005.19  
54  
55 99. Percy AK, Lee HS, Neul JL, et al. Profiling scoliosis in Rett syndrome. *Pediatr Res* 2010;67(4):435-  
56 39.  
57  
58 100. Killian JT, Lane JB, Lee HS, et al. Scoliosis in Rett Syndrome: Progression, Comorbidities, and  
59 Predictors. *Pediatr Neurol* 2017;70:20-25. doi: 10.1016/j.pediatrneurol.2017.01.032 [published  
60 Online First: 2017/03/30]  
61  
62 101. Downs J, Bergman A, Carter P, et al. Guidelines for management of scoliosis in Rett syndrome  
63 patients based on expert consensus and clinical evidence. *Spine (Phila Pa 1976)*  
64 2009;34(17):E607-E17.  
65  
66 102. Downs J, Torode I, Wong K, et al. Surgical fusion of early onset severe scoliosis increases survival  
67 in Rett syndrome: a cohort study. *Dev Med Child Neurol* 2016;58(6):632-8. doi:  
68 10.1111/dmcn.12984 [published Online First: 2015/12/15]  
69  
70 103. Tay G, Graham H, Graham HK, et al. Hip displacement and scoliosis in Rett syndrome - screening is  
71 required. *Dev Med Child Neurol* 2010;52(1):93-8. doi: 10.1111/j.1469-8749.2009.03359.x

- 1  
2  
3 104. Cass H, Reilly S, Owen L, et al. Findings from a multidisciplinary clinical case series of females  
4 with Rett syndrome. *Dev Med Child Neurol* 2003;45(5):325-37.  
5  
6 105. Hirano D, Taniguchi T. Skin injuries and joint contractures of the upper extremities in Rett  
7 syndrome. *J Intellect Disabil Res* 2018;62(1):53-59. doi: 10.1111/jir.12452 [published Online  
8 First: 2017/12/08]  
9  
10 106. Downs J, Bebbington A, Woodhead H, et al. Early determinants of fractures in Rett syndrome.  
11 *Pediatrics* 2008;121(3):540-6. doi: 10.1542/peds.2007-1641 [published Online First: 2008/03/04]  
12  
13 107. Jefferson AL, Woodhead HJ, Fyfe S, et al. Bone mineral content and density in Rett syndrome and  
14 their contributing factors. *Pediatr Res* 2011;69(4):293-8. doi: 10.1203/PDR.0b013e31820b937d  
15  
16 108. Freundlich K. Pressure Injuries in Medically Complex Children: A Review. *Children (Basel)*  
17 2017;4(4) doi: 10.3390/children4040025 [published Online First: 2017/04/08]  
18  
19 109. Stagi S, Cavalli L, Congiu L, et al. Thyroid function in Rett syndrome. *Horm Res Paediatr*  
20 2015;83(2):118-25. doi: 10.1159/000370066  
21  
22 110. Tauboll E, Sveberg L, Svalheim S. Interactions between hormones and epilepsy. *Seizure* 2015;28:3-  
23 11. doi: 10.1016/j.seizure.2015.02.012  
24  
25 111. Buchanan CB, Stallworth JL, Scott AE, et al. Behavioral profiles in Rett syndrome: Data from the  
26 natural history study. *Brain Dev* 2018 doi: 10.1016/j.braindev.2018.08.008 [published Online  
27 First: 2018/09/16]  
28  
29 112. Wong K, Leonard H, Jacoby P, et al. The trajectories of sleep disturbances in Rett syndrome. *J Sleep*  
30 *Res* 2015;24(2):223-33. doi: 10.1111/jsr.12240  
31  
32 113. Boban S, Leonard H, Wong K, et al. Sleep disturbances in Rett syndrome: Impact and management  
33 including use of sleep hygiene practices. *Am J Med Genet A* 2018;176(7):1569-77. doi:  
34 10.1002/ajmg.a.38829  
35  
36 114. Jan JE, Owens JA, Weiss MD, et al. Sleep hygiene for children with neurodevelopmental  
37 disabilities. *Pediatrics* 2008;122(6):1343-50. doi: 10.1542/peds.2007-3308  
38  
39 115. Dye TJ, Jain SV, Simakajornboon N. Outcomes of long-term iron supplementation in pediatric  
40 restless legs syndrome/periodic limb movement disorder (RLS/PLMD). *Sleep Med* 2017;32:213-  
41 19. doi: 10.1016/j.sleep.2016.01.008  
42  
43 116. Aurora RN, Zak RS, Karippot A, et al. Practice parameters for the respiratory indications for  
44 polysomnography in children. *Sleep* 2011;34(3):379-88. doi: 10.1093/sleep/34.3.379  
45  
46 117. Lai YYL, Wong K, King NM, et al. Oral health experiences of individuals with Rett syndrome: a  
47 retrospective study. *BMC Oral Health* 2018;18(1):195. doi: 10.1186/s12903-018-0651-y  
48 [published Online First: 2018/12/01]  
49  
50 118. Tarquinio DC, Hou W, Neul JL, et al. Age of diagnosis in Rett syndrome: patterns of recognition  
51 among diagnosticians and risk factors for late diagnosis. *Pediatr Neurol* 2015;52(6):585-91 e2.  
52 doi: 10.1016/j.pediatrneurol.2015.02.007  
53  
54 119. Lane JB, Lee HS, Smith LW, et al. Clinical severity and quality of life in children and adolescents  
55 with Rett syndrome. *Neurology* 2011;77(20):1812-18.  
56  
57 120. Mori Y, Downs J, Wong K, et al. Longitudinal effects of caregiving on parental well-being: the  
58 example of Rett syndrome, a severe neurological disorder. *Eur Child Adolesc Psychiatry*  
59 2019;28(4):505-20. doi: 10.1007/s00787-018-1214-0 [published Online First: 2018/08/29]  
60
