# Supplementary material for: Consensus guidelines on managing Rett syndrome across the lifespan
Source: PubMed Central journal article supplement — BMJ Paediatr Open. 2020 Sep 13;4(1):e000717. doi: 10.1136/bmjpo-2020-000717 (PMC7488790; doi:10.1136/bmjpo-2020-000717), 2020-09-13
Supplement: bmjpo-2020-000717supp001.pdf [file bmjpo-2020-000717supp001.pdf]

| <b>Supplementary Table 1. Health supervision goals surrounding individuals with RTT by ICF contextual factors</b> |                                                                                                                                                                                                                                                                                                                                |                                                                                                                                                                                                                                                                                                                                                                                     |                                                                                                                                                                                                                                                                                                                                                                                                     |                                                                                                                                                                                                                                                                                                                                                                                                     |
|-------------------------------------------------------------------------------------------------------------------|--------------------------------------------------------------------------------------------------------------------------------------------------------------------------------------------------------------------------------------------------------------------------------------------------------------------------------|-------------------------------------------------------------------------------------------------------------------------------------------------------------------------------------------------------------------------------------------------------------------------------------------------------------------------------------------------------------------------------------|-----------------------------------------------------------------------------------------------------------------------------------------------------------------------------------------------------------------------------------------------------------------------------------------------------------------------------------------------------------------------------------------------------|-----------------------------------------------------------------------------------------------------------------------------------------------------------------------------------------------------------------------------------------------------------------------------------------------------------------------------------------------------------------------------------------------------|
|                                                                                                                   | Early Childhood                                                                                                                                                                                                                                                                                                                | Late Childhood                                                                                                                                                                                                                                                                                                                                                                      | Post-puberty                                                                                                                                                                                                                                                                                                                                                                                        | Adulthood                                                                                                                                                                                                                                                                                                                                                                                           |
| Body Functions and Structure                                                                                      | <p>GI/Nutrition: Maintain adequate growth, bone health, and nutrition; manage reflux and constipation</p> <p>Neurological: Identify and manage epilepsy when present; identify and manage autonomic dysfunction</p> <p>Rehabilitation: develop strength and coordination</p> <p>Cardiology: detect and manage prolonged QT</p> | <p>GI/Nutrition: Maintain adequate growth, bone health, and nutrition; manage reflux and constipation</p> <p>Neurological: Identify and manage epilepsy when present; identify and manage autonomic dysfunction</p> <p>Rehabilitation: regulate tone and prevent contractures</p> <p>Cardiology: detect and manage prolonged QT</p> <p>Orthopedics: detect and manage scoliosis</p> | <p>GI/Nutrition: Maintain nutrition and bone health; manage constipation; detect and manage gall bladder dysfunction</p> <p>Neurological: Identify and manage epilepsy when present; identify and manage autonomic dysfunction</p> <p>Rehabilitation: regulate tone and prevent contractures</p> <p>Cardiology: detect and manage prolonged QT</p> <p>Orthopedics: detect and prevent fractures</p> | <p>GI/Nutrition: Maintain nutrition and bone health; manage constipation; detect and manage gall bladder dysfunction</p> <p>Neurological: Identify and manage epilepsy when present; identify and manage autonomic dysfunction</p> <p>Rehabilitation: regulate tone and prevent contractures</p> <p>Cardiology: detect and manage prolonged QT</p> <p>Orthopedics: detect and prevent fractures</p> |
| Environment                                                                                                       | <p>Education: Develop appropriate IEP</p> <p>Therapies: Access to appropriate therapies</p> <p>Socialization: Age-appropriate interactions and activities</p>                                                                                                                                                                  | <p>Education: Develop appropriate IEP</p> <p>Therapies: Access to appropriate therapies including physical, occupational, and assistive communication technologies</p> <p>Socialization: Age-appropriate interactions and activities</p>                                                                                                                                            | <p>Education: Develop appropriate IEP</p> <p>Therapies: Access to appropriate therapies including physical, occupational, and assistive communication technologies</p> <p>Socialization: Age-appropriate interactions and activities</p>                                                                                                                                                            | <p>Education: Transition to Adult Daycare programs.</p> <p>Therapies: Access to appropriate therapies including physical, occupational, and assistive communication technologies</p> <p>Socialization: Age-appropriate interactions and activities</p>                                                                                                                                              |
